# Supplementary material for: Optimization of a High-Throughput 384-Well Plate-Based Screening Platform with Staphylococcus aureus ATCC 25923 and Pseudomonas aeruginosa ATCC 15442 Biofilms
Source: MDPI journal article supplement (doi:10.3390/ijms21093034), 2020-04-25
Supplement: s1 [file s1]

**Supplementary Table 1.** Identification and source of the compounds and results of the pilot screening performed on *S. aureus* biofilms in 96WP and 384WP. Results are expressed as the average percentage of inhibition from two biological replicates.

| Compounds                                                   | ID number | Source              | Inhibition of <i>S. aureus</i> biofilms (%) |       |               |       |               |       |               |       |
|-------------------------------------------------------------|-----------|---------------------|---------------------------------------------|-------|---------------|-------|---------------|-------|---------------|-------|
|                                                             |           |                     | Pre-exposure                                |       |               |       | Post-exposure |       |               |       |
|                                                             |           |                     | Viability                                   |       | Total biomass |       | Viability     |       | Total biomass |       |
|                                                             |           |                     | 96WP                                        | 384WP | 96WP          | 384WP | 96WP          | 384WP | 96WP          | 384WP |
| Rifampicin                                                  | R3501     | Sigma-Aldrich       | 98.7                                        | 100.6 | 88.1          | 81.3  | 48.6          | 65.2  | 10.1          | 41.5  |
| Oxacillin                                                   | 28221     | Sigma-Aldrich       | 99.8                                        | 100.6 | 96.9          | 97.2  | 25.5          | 61.7  | 21.9          | 52.1  |
| Doxycycline                                                 | D9891     | Sigma-Aldrich       | 99.1                                        | 100.4 | 88.8          | 91.2  | 34.0          | 45.1  | -27.6         | 35.1  |
| Penicillin                                                  | 13752     | Sigma-Aldrich       | 99.4                                        | 100.4 | 98.8          | 100.8 | 48.8          | 62.2  | 40.4          | 38.0  |
| Streptomycin                                                | 56501     | Sigma-Aldrich       | 36.5                                        | 100.0 | 37.5          | 100.1 | 3.1           | 8.5   | 6.8           | -2.8  |
| Tetracycline                                                | 87128     | Fluka Analytical    | 99.2                                        | 100.7 | 90.7          | 101.3 | 31.0          | 50.7  | -13.7         | 17.9  |
| Ampicillin                                                  | A6140     | Sigma-Aldrich       | 99.9                                        | 101.2 | 99.5          | 84.9  | 33.7          | 69.5  | 36.9          | 32.4  |
| Dicloxacillin                                               | D9016     | Sigma-Aldrich       | 100.2                                       | 101.1 | 99.1          | 91.8  | 36.1          | 65.2  | 37.1          | 36.7  |
| Levofloxacin                                                | 28266     | Sigma-Aldrich       | 98.3                                        | 101.0 | 86.4          | 95.7  | 33.3          | 60.9  | 36.6          | 30.6  |
| Vancomycin                                                  | 861987    | Sigma-Aldrich       | 98.4                                        | 101.3 | 95.6          | 100.8 | 13.1          | 14.7  | 23.6          | 12.2  |
| <i>N</i> -(abiet-8,11,13-trien-18-oyl) cyclohexyl-L-alanine | 11        | Manner et al., 2015 | 42.8                                        | 21.0  | 6.7           | -31.7 | 3.2           | 18.6  | 4.4           | 2.0   |
| <i>N</i> -(abiet-8,11,13-trien-18-oyl)-D-tryptophan         | 9b        | Manner et al., 2015 | 16.2                                        | 0.0   | 31.3          | -39.7 | 5.2           | 29.1  | -5.0          | 11.6  |
| 102                                                         | ST006037  | NDL-3000            | 16.7                                        | 9.2   | 13.6          | -8.7  | 14.5          | 31.8  | 14.0          | 29.0  |
| 103                                                         | ST006587  | NDL-3000            | 12.4                                        | 11.5  | 1.3           | -8.3  | 9.2           | 23.2  | -7.0          | 28.4  |
| 104                                                         | ST006593  | NDL-3000            | 9.6                                         | 12.6  | 2.6           | 7.3   | -6.7          | 37.2  | -12.4         | 27.1  |
| 105                                                         | ST007000  | NDL-3000            | 6.7                                         | 4.0   | -6.2          | -19.7 | 0.5           | 8.3   | 14.1          | 29.2  |
| 106                                                         | ST007035  | NDL-3000            | 5.1                                         | 8.5   | -2.6          | -0.9  | 7.0           | 14.6  | -1.3          | -4.8  |
| 107                                                         | ST007286  | NDL-3000            | 11.1                                        | 7.9   | 23.7          | -5.5  | 17.5          | 35.2  | 0.3           | 18.7  |
| 164                                                         | ST012939  | NDL-3000            | 2.5                                         | 8.7   | -35.1         | -19.8 | 20.7          | 29.3  | 13.1          | 14.0  |
| 165                                                         | ST012940  | NDL-3000            | -2.5                                        | 7.3   | -50.0         | -16.2 | -0.8          | 31.8  | 10.4          | 27.2  |
| 166                                                         | ST012949  | NDL-3000            | -0.9                                        | 15.7  | -23.5         | -16.5 | 0.7           | 33.1  | 4.2           | 22.9  |
| 167                                                         | ST012956  | NDL-3000            | 0.1                                         | 2.2   | -40.4         | -8.3  | 3.6           | 17.6  | -2.9          | 10.3  |
| 168                                                         | ST012957  | NDL-3000            | -1.4                                        | 6.9   | -35.0         | -24.7 | 4.8           | 9.5   | -14.5         | 6.2   |
| 169                                                         | ST012960  | NDL-3000            | -1.0                                        | -2.5  | -39.3         | -23.8 | 9.7           | 10.2  | -1.1          | 10.4  |
| 170                                                         | ST013021  | NDL-3000            | 10.0                                        | 11.0  | -8.3          | -15.8 | 5.2           | 27.1  | 13.3          | 26.2  |
| 1030                                                        | ST070457  | NDL-3000            | 3.0                                         | 8.8   | 1.5           | 3.7   | -4.2          | 32.1  | -9.2          | 21.1  |
| 1031                                                        | ST070458  | NDL-3000            | 12.3                                        | 12.2  | 26.6          | -4.3  | -3.7          | 35.3  | -9.1          | 27.5  |
| 1032                                                        | ST070492  | NDL-3000            | 6.5                                         | 9.2   | 22.9          | -21.4 | 5.3           | 11.7  | -0.8          | 8.6   |
| 1033                                                        | ST070499  | NDL-3000            | 11.9                                        | 11.2  | 7.3           | -2.2  | 3.9           | 14.2  | -4.9          | 0.2   |
| 1034                                                        | ST070506  | NDL-3000            | 8.3                                         | 17.2  | 19.5          | 11.3  | 10.7          | 17.6  | 5.3           | 26.8  |
| 1035                                                        | ST070595  | NDL-3000            | -0.4                                        | 4.7   | -23.7         | -3.4  | 12.4          | 15.0  | -5.8          | -3.2  |
| 1036                                                        | ST070604  | NDL-3000            | 1.2                                         | 15.7  | 2.6           | 21.2  | -2.4          | 32.9  | -2.4          | 34.5  |
| 1037                                                        | ST070609  | NDL-3000            | 4.4                                         | 15.7  | 14.2          | -3.8  | 14.1          | 30.2  | 13.8          | 19.1  |
| 1038                                                        | ST070619  | NDL-3000            | 1.6                                         | 9.9   | 15.7          | -1.7  | -2.1          | 9.8   | -11.7         | 29.2  |
| 1039                                                        | ST070626  | NDL-3000            | -1.5                                        | 5.3   | 9.6           | -24.3 | 8.4           | 20.6  | -7.0          | 12.8  |
| 1040                                                        | ST070645  | NDL-3000            | 8.3                                         | 10.2  | 31.2          | -6.4  | 0.4           | 31.5  | -2.7          | 13.1  |
| 1103                                                        | ST071169  | NDL-3000            | 14.1                                        | 14.5  | -3.7          | -6.3  | 2.5           | -4.3  | -18.1         | -9.6  |
| 1104                                                        | ST071178  | NDL-3000            | 2.9                                         | 15.5  | 1.7           | -2.8  | -7.5          | 31.2  | -16.3         | 29.0  |
| 1105                                                        | ST071180  | NDL-3000            | 15.4                                        | 4.0   | -11.3         | -68.3 | 24.7          | 45.4  | -4.2          | 18.5  |

|      |          |          |      |      |       |       |       |       |       |       |
|------|----------|----------|------|------|-------|-------|-------|-------|-------|-------|
| 1427 | ST074775 | NDL-3000 | 29.1 | 2.1  | -13.9 | -25.3 | 6.9   | 27.8  | -26.2 | 13.9  |
| 1428 | ST074776 | NDL-3000 | 31.1 | 10.6 | 2.2   | -8.4  | 8.3   | 14.5  | -9.8  | 2.2   |
| 1429 | ST074777 | NDL-3000 | 29.7 | 12.8 | 16.7  | 5.1   | -0.5  | 30.4  | -10.5 | -2.9  |
| 1430 | ST074778 | NDL-3000 | 9.8  | 21.0 | 21.8  | 1.0   | 23.9  | 33.3  | -5.0  | 10.1  |
| 1431 | ST074779 | NDL-3000 | 10.0 | 17.2 | 0.3   | 12.7  | 12.2  | 27.0  | -6.2  | 24.0  |
| 1432 | ST074780 | NDL-3000 | 15.9 | 16.0 | -2.8  | -20.7 | 5.2   | 36.4  | -7.0  | 22.3  |
| 1433 | ST074781 | NDL-3000 | 5.5  | 13.5 | -20.3 | -2.0  | 0.7   | 21.4  | -9.3  | 23.4  |
| 1434 | ST074782 | NDL-3000 | 10.0 | -0.4 | 7.3   | -9.2  | -4.8  | 6.0   | -14.2 | -5.9  |
| 1435 | ST074783 | NDL-3000 | 12.8 | 7.7  | 10.0  | 0.0   | 4.2   | 19.0  | -2.1  | 17.0  |
| 1436 | ST074784 | NDL-3000 | 12.6 | 10.5 | -3.0  | -7.2  | -2.6  | 34.0  | -7.7  | 25.9  |
| 1437 | ST074785 | NDL-3000 | 9.6  | 15.8 | -5.1  | -4.2  | -4.4  | 34.9  | -9.1  | 23.6  |
| 2084 | ST081356 | NDL-3000 | 7.1  | 20.4 | 18.1  | 0.0   | -1.2  | 20.7  | 28.2  | 39.2  |
| 2085 | ST081364 | NDL-3000 | 0.0  | -2.6 | -0.1  | -14.8 | -10.8 | 7.1   | 6.3   | 16.2  |
| 2086 | ST081380 | NDL-3000 | 6.4  | 14.1 | 16.1  | 1.8   | 9.8   | 18.8  | 2.1   | 4.6   |
| 2280 | ST088177 | NDL-3000 | 2.1  | 12.0 | 25.6  | 1.3   | 5.4   | 26.0  | 3.9   | 26.9  |
| 2281 | ST088185 | NDL-3000 | 4.0  | 15.3 | 6.7   | -12.6 | 0.1   | 38.9  | 2.8   | 23.6  |
| 2282 | ST088217 | NDL-3000 | 2.5  | 16.8 | 20.9  | 0.1   | 9.7   | 40.9  | 9.9   | 24.5  |
| 2283 | ST088220 | NDL-3000 | 6.1  | 21.8 | 2.4   | -4.3  | 9.0   | 39.8  | 15.8  | 38.9  |
| 2284 | ST088330 | NDL-3000 | -5.0 | 0.4  | 2.6   | -20.4 | 2.4   | 29.6  | 9.3   | 24.3  |
| 2285 | ST088333 | NDL-3000 | 15.9 | 4.4  | 19.1  | -15.0 | 2.0   | 13.6  | -19.7 | -22.5 |
| 2324 | ST088606 | NDL-3000 | 1.3  | 6.0  | 17.9  | -13.3 | 0.0   | 31.1  | -3.8  | 27.7  |
| 2325 | ST088608 | NDL-3000 | 6.3  | 10.2 | 12.0  | -20.7 | 3.2   | 33.1  | 5.7   | 36.5  |
| 2326 | ST088612 | NDL-3000 | 8.3  | 9.8  | 18.6  | -16.6 | 5.6   | 35.8  | 3.8   | 35.7  |
| 2409 | ST092585 | NDL-3000 | -1.0 | 15.1 | 18.1  | -16.3 | 13.5  | 31.5  | -5.7  | 39.1  |
| 2410 | ST092586 | NDL-3000 | -8.8 | 2.9  | 11.2  | -26.5 | 5.3   | 11.2  | 6.6   | 26.1  |
| 2411 | ST092587 | NDL-3000 | 2.2  | 6.7  | -4.0  | -10.3 | 10.7  | 23.1  | 9.2   | -7.9  |
| 2412 | ST092601 | NDL-3000 | 4.1  | 8.9  | 6.0   | -15.7 | 4.9   | 34.4  | 19.0  | 17.6  |
| 2413 | ST092612 | NDL-3000 | 0.6  | 14.6 | -8.6  | -8.6  | 0.0   | 34.4  | 16.4  | 27.0  |
| 2414 | ST092622 | NDL-3000 | 16.2 | 11.0 | 10.9  | -9.1  | 29.7  | 37.9  | 28.2  | 36.3  |
| 2415 | ST092632 | NDL-3000 | 17.4 | 21.6 | -1.2  | -3.0  | 18.4  | 42.2  | 17.9  | 39.8  |
| 2416 | ST092652 | NDL-3000 | -6.9 | 6.5  | 14.6  | -15.5 | 4.1   | 32.7  | 14.8  | 36.0  |
| 2417 | ST092660 | NDL-3000 | 5.1  | 10.4 | 13.8  | 8.2   | -0.2  | 3.5   | 5.2   | -5.0  |
| 2418 | ST092677 | NDL-3000 | -5.5 | 10.6 | 25.1  | -2.1  | -0.4  | 25.0  | 4.4   | 25.4  |
| 2419 | ST092685 | NDL-3000 | 5.6  | 15.3 | 30.2  | -2.6  | 6.6   | 31.6  | 21.8  | 15.0  |
| 2420 | ST092688 | NDL-3000 | 12.5 | 10.4 | 30.1  | 0.2   | 13.5  | 29.9  | 20.0  | 28.4  |
| 2421 | ST092693 | NDL-3000 | 13.1 | 12.5 | 17.0  | -12.8 | 8.8   | 31.1  | 13.8  | 34.9  |
| 2422 | ST092696 | NDL-3000 | -5.2 | 4.2  | 14.0  | -8.5  | 6.6   | 7.3   | 5.2   | 17.0  |
| 2423 | ST092700 | NDL-3000 | 13.0 | 7.8  | 13.6  | -13.7 | -1.7  | -11.4 | 4.9   | -36.8 |
| 2424 | ST092701 | NDL-3000 | 4.1  | 11.4 | 12.0  | -20.6 | 1.1   | 26.5  | 4.7   | 15.7  |
| 2425 | ST092702 | NDL-3000 | 13.4 | 17.3 | 19.6  | -18.5 | 5.2   | 33.0  | 25.8  | 17.5  |
| 2465 | ST092936 | NDL-3000 | 21.4 | 18.0 | 29.5  | -4.1  | 5.5   | 26.3  | 19.0  | 8.5   |
| 2466 | ST092942 | NDL-3000 | 14.4 | 18.0 | 27.1  | -0.8  | 9.6   | 25.9  | 15.0  | 16.4  |
| 2467 | ST092966 | NDL-3000 | 2.5  | 7.5  | 22.5  | -24.9 | -6.1  | 22.7  | -1.8  | -5.7  |
| 2468 | ST092971 | NDL-3000 | -5.2 | 7.7  | -20.1 | -55.0 | -11.8 | -1.1  | -15.7 | -35.7 |
| 2469 | ST092972 | NDL-3000 | 5.2  | 5.7  | -18.8 | -58.0 | -14.3 | 9.8   | -30.5 | -10.8 |
| 2470 | ST093057 | NDL-3000 | 10.1 | 10.6 | 1.0   | -5.9  | 3.6   | 11.0  | 23.9  | 20.8  |
| 2471 | ST093063 | NDL-3000 | 1.9  | 5.6  | 5.6   | -26.3 | 0.1   | 22.8  | 11.9  | 12.9  |
| 2590 | ST095411 | NDL-3000 | -5.1 | 14.5 | 7.2   | -28.4 | -1.9  | 25.5  | 12.7  | 21.5  |

|      |          |          |       |      |      |       |       |       |       |       |
|------|----------|----------|-------|------|------|-------|-------|-------|-------|-------|
| 2591 | ST095412 | NDL-3000 | 4.8   | 3.3  | 9.5  | -12.3 | -2.8  | 4.1   | -4.0  | 15.5  |
| 2592 | ST095413 | NDL-3000 | 8.9   | 10.0 | 19.8 | -1.1  | -13.7 | 21.8  | -9.5  | -8.8  |
| 2593 | ST095414 | NDL-3000 | -7.7  | 7.6  | 12.6 | -13.3 | -15.5 | 16.2  | 2.5   | 11.9  |
| 2594 | ST095416 | NDL-3000 | -1.3  | 17.0 | 10.2 | -6.5  | -0.3  | 26.6  | 22.5  | 3.5   |
| 2595 | ST095417 | NDL-3000 | -19.7 | -2.3 | -4.3 | -22.5 | -21.3 | -18.1 | -3.4  | -22.1 |
| 2596 | ST095418 | NDL-3000 | 4.9   | 15.6 | 0.1  | -21.4 | -1.3  | 27.9  | 10.0  | 9.0   |
| 2597 | ST095419 | NDL-3000 | -6.7  | 8.3  | 3.3  | -15.1 | -10.7 | -1.2  | 1.8   | 12.8  |
| 2965 | ST085690 | NDL-3000 | -2.3  | -3.2 | 16.7 | -36.6 | -14.3 | -1.1  | -15.4 | 8.5   |
| 2966 | ST085855 | NDL-3000 | -6.5  | 4.5  | 9.5  | -31.9 | -13.7 | 10.4  | -10.1 | 20.2  |
| 2967 | ST085897 | NDL-3000 | -3.7  | 5.3  | 18.1 | -24.6 | -3.4  | 13.4  | 21.5  | 33.2  |
| 2968 | ST085899 | NDL-3000 | -5.3  | 8.6  | 18.1 | -3.2  | -5.0  | 11.1  | 13.4  | 20.7  |
| 2969 | ST085955 | NDL-3000 | -4.9  | 11.2 | 0.5  | -47.7 | -16.8 | 20.6  | 0.2   | 20.9  |
| 2970 | ST086020 | NDL-3000 | -11.6 | -1.0 | 9.5  | -47.3 | -9.4  | -1.8  | -15.4 | 13.8  |
