# Supplementary material for: Optimization of a High-Throughput 384-Well Plate-Based Screening Platform with Staphylococcus aureus ATCC 25923 and Pseudomonas aeruginosa ATCC 15442 Biofilms
Source: MDPI journal article supplement (doi:10.3390/ijms21093034), 2020-04-25
Supplement: s1 [file s1]

**Table S2.** Identification of the compounds from the Microsource Spectrum Collection (Discovery Systems Inc.) and results of the screening performed on *S. aureus* planktonic cells and biofilms in 384WP.

| Compounds name              | Inhibition of <i>S. aureus</i> (%) <sup>1</sup> |           |           |         |                  |           |           |         |
|-----------------------------|-------------------------------------------------|-----------|-----------|---------|------------------|-----------|-----------|---------|
|                             | Pre-exposure                                    |           |           |         | Post-exposure    |           |           |         |
|                             | Planktonic cells                                |           | Biofilm   |         | Planktonic cells |           | Biofilm   |         |
|                             | Turbidity                                       | Viability | Viability | Biomass | Turbidity        | Viability | Viability | Biomass |
| MAFENIDE HYDROCHLORIDE      | 9.9                                             | 8.6       | -5.7      | 3.2     | -5.3             | 30.7      | -49.9     | 2.6     |
| NEFOPAM                     | 19.3                                            | 8.1       | -21.3     | 18.5    | 52.3             | -1.0      | -26.5     | 4.3     |
| METAPROTERENOL              | 28.7                                            | 12.3      | -15.9     | 6.8     | 45.3             | 15.5      | -46.6     | 21.7    |
| SULPIRIDE                   | 23.5                                            | 9.3       | 7.2       | 24.1    | 31.8             | -3.5      | 12.4      | 3.1     |
| METRONIDAZOLE               | 36.3                                            | 14.2      | -14.9     | -3.3    | 28.4             | 14.5      | -9.6      | -18.0   |
| ESTRADIOL ACETATE           | 17.1                                            | -23.5     | -19.3     | 25.0    | 28.8             | -27.4     | -38.1     | -26.7   |
| NIACIN                      | 33.9                                            | 8.8       | -14.5     | -1.0    | 29.2             | 10.2      | -17.7     | -5.6    |
| LISINOPRIL                  | 17.2                                            | -26.7     | 12.5      | 6.2     | 32.4             | -22.0     | 26.5      | 31.9    |
| NOSCAPINE HYDROCHLORIDE     | 22.1                                            | 11.6      | -0.8      | -11.8   | 34.6             | -8.0      | 30.1      | 8.2     |
| SURAMIN                     | 37.9                                            | -17.4     | -16.1     | 9.6     | 32.9             | -23.4     | -14.0     | -22.7   |
| PAPAVERINE HYDROCHLORIDE    | 25.0                                            | 1.9       | -11.6     | 3.5     | 29.3             | -3.3      | 0.8       | 19.8    |
| PHENYLETHYL ALCOHOL         | 17.1                                            | -38.9     | -1.3      | 16.4    | 24.2             | -19.5     | 5.2       | -24.2   |
| PHENYTOIN SODIUM            | 2.2                                             | -9.5      | -0.4      | 24.8    | 14.0             | -15.5     | 10.7      | 0.8     |
| EDROPHONIUM CHLORIDE        | 12.8                                            | -43.6     | 2.1       | 29.1    | 9.5              | -21.7     | -16.8     | 18.6    |
| PUROMYCIN HYDROCHLORIDE     | 22.1                                            | 22.1      | -10.2     | -3.0    | -20.3            | 18.4      | -47.1     | -2.7    |
| SULFADOXINE                 | 49.3                                            | 3.6       | -13.4     | -12.0   | 36.6             | 10.7      | -28.9     | 1.4     |
| POTASSIUM p-AMINO BENZOATE  | 53.0                                            | 30.3      | -15.2     | -5.4    | 48.1             | 30.8      | -20.7     | 2.6     |
| PHENYL AMINOSALICYLATE      | 41.1                                            | 6.3       | -11.7     | -17.5   | 36.3             | 12.2      | 7.4       | 0.2     |
| PIRACETAM                   | 49.2                                            | 27.8      | -12.6     | -12.2   | 35.9             | 21.3      | 1.6       | -12.0   |
| IVERMECTIN                  | 23.5                                            | -5.3      | -10.8     | -10.7   | 40.1             | 10.3      | -12.2     | 5.4     |
| SENNOSIDE A                 | 50.1                                            | 17.4      | -2.7      | -20.7   | 42.2             | 26.8      | -23.9     | -11.8   |
| ADENOSINE                   | 32.5                                            | -7.9      | 6.3       | -7.8    | 33.0             | 4.3       | 29.2      | 20.5    |
| METAXALONE                  | 30.8                                            | 25.1      | -7.7      | -10.6   | 32.4             | 6.5       | 25.9      | 6.8     |
| AMODIAQUINE DIHYDROCHLORIDE | 40.5                                            | 9.1       | -10.6     | -20.8   | 49.4             | 14.4      | 7.9       | 16.3    |
| PROPOFOL                    | 49.9                                            | 20.6      | -16.5     | -22.1   | 30.3             | 11.2      | 12.3      | 3.8     |
| ATROPINE SULFATE            | 30.6                                            | -19.4     | -6.9      | -17.7   | 43.8             | -6.4      | -4.2      | -12.3   |
| RANOLAZINE                  | 31.3                                            | 7.1       | -1.4      | -15.9   | 27.8             | 0.3       | 15.2      | 0.9     |
| beta-CAROTENE               | 12.9                                            | -28.7     | 6.1       | -5.0    | -9.7             | -15.3     | 3.7       | 18.4    |
| LEVAlBUTEROL HYDROCHLORIDE  | 13.1                                            | 5.5       | -10.8     | -8.3    | 0.2              | 10.3      | -24.5     | -6.5    |
| CARBACHOL                   | 28.3                                            | 11.1      | -2.2      | -16.4   | 40.0             | 10.1      | -19.6     | 24.4    |
| LEVODOPA                    | 69.7                                            | 55.0      | -29.2     | -21.6   | 72.6             | 53.3      | -46.8     | -13.6   |
| CETYLPYRIDINIUM CHLORIDE    | 99.7                                            | 97.8      | 98.6      | 95.1    | 43.6             | 18.9      | 0.6       | -1.5    |
| MAPROTILINE HYDROCHLORIDE   | 49.6                                            | 9.6       | -6.7      | -19.6   | 43.2             | 22.0      | 2.8       | 4.6     |

|                              |      |       |       |       |       |       |       |       |
|------------------------------|------|-------|-------|-------|-------|-------|-------|-------|
| PIRENZEPINE HYDROCHLORIDE    | 48.7 | 19.5  | -7.9  | -21.3 | 45.9  | 24.2  | -19.6 | 15.6  |
| METHACHOLINE CHLORIDE        | 50.0 | 26.3  | -12.4 | -18.3 | 33.9  | 18.3  | 1.5   | 1.0   |
| RANITIDINE                   | 35.0 | 18.0  | 5.8   | -17.9 | 33.9  | 12.9  | 31.1  | 35.4  |
| MINOCYCLINE HYDROCHLORIDE    | 98.9 | 97.4  | 94.8  | 92.0  | 74.0  | 66.6  | 41.8  | -11.2 |
| ECONAZOLE NITRATE            | 99.7 | 93.9  | 94.4  | 92.4  | 66.7  | -15.1 | -4.8  | 14.1  |
| NIFEDIPINE                   | 55.7 | 20.7  | -16.9 | -17.0 | 36.5  | 1.4   | 9.7   | 8.9   |
| BUMETANIDE                   | 36.1 | 13.3  | -9.2  | -22.6 | 41.1  | 2.4   | 17.3  | 21.9  |
| NOVOBIOCIN SODIUM            | 99.4 | 96.4  | 99.3  | 89.6  | 77.7  | 55.4  | 48.9  | 7.4   |
| CEFUROXIME SODIUM            | 31.0 | -25.2 | 26.3  | 13.6  | 34.9  | -24.6 | 25.2  | 34.9  |
| PARACHLOROPHENOL             | 23.4 | 8.5   | 4.4   | 21.1  | -10.1 | 18.0  | 9.0   | 21.8  |
| MECLOCYCLINE SULFOSALICYLATE | 98.8 | 98.1  | 97.1  | 93.3  | 96.2  | 91.7  | 11.8  | -27.4 |
| FENOFIBRATE                  | 50.8 | 13.2  | -2.7  | -15.2 | 52.4  | 14.4  | -19.5 | -1.8  |
| THIOPENTAL SODIUM            | 48.7 | 7.0   | -19.0 | -22.8 | 33.8  | 22.3  | 10.0  | 10.7  |
| MEBENDAZOLE                  | 41.6 | 23.6  | -5.4  | -23.0 | 40.6  | 25.9  | 4.0   | 11.4  |
| FINASTERIDE                  | 55.4 | 26.5  | -17.1 | -25.1 | 36.2  | 15.8  | -1.1  | -13.3 |
| BETAMETHASONE VALERATE       | 51.1 | 31.3  | -16.3 | -24.6 | 32.8  | 19.3  | -6.5  | 0.0   |
| TESTOSTERONE                 | 44.5 | -11.2 | 0.8   | -21.1 | 29.8  | -6.1  | 26.8  | 13.9  |
| GLUCONOLACTONE               | 40.9 | 8.5   | 5.3   | -18.8 | 31.9  | 10.3  | 32.3  | 26.9  |
| SODIUM NITROPRUSSIDE         | 53.5 | -8.7  | -15.3 | -21.8 | 37.6  | 3.3   | 0.2   | -20.3 |
| TENIPOSIDE                   | 98.0 | 97.4  | 96.9  | 91.4  | 65.8  | 35.9  | 12.3  | -12.0 |
| ALLOPURINOL                  | 52.5 | -5.1  | -15.7 | -23.1 | 43.1  | 8.5   | 5.9   | 17.2  |
| CHLOROGUANIDE HYDROCHLORIDE  | 23.7 | -4.4  | -2.0  | -17.4 | 33.3  | -9.4  | 6.9   | 23.5  |
| AMOXICILLIN                  | 27.6 | -14.2 | 4.3   | -5.2  | 14.9  | -14.3 | 16.0  | 43.0  |
| GRISEOFULVIN                 | 14.8 | 10.7  | -2.7  | 4.6   | -1.7  | 8.5   | -0.7  | 24.8  |
| AUROTHIOGLUCOSE              | 53.5 | 9.4   | -7.3  | -20.6 | 72.0  | 48.8  | -46.3 | -15.4 |
| DANTHRON                     | 59.1 | 43.1  | -17.8 | -18.8 | 53.0  | 21.5  | -27.4 | 13.6  |
| BETAMETHASONE                | 55.1 | 21.2  | -15.7 | -23.1 | 49.8  | 24.8  | 21.2  | 1.0   |
| METFORMIN HYDROCHLORIDE      | 48.7 | 34.1  | -2.8  | -20.4 | 41.8  | 18.2  | 1.4   | 16.7  |
| CARBAMAZEPINE                | 61.2 | 34.6  | -15.7 | -23.1 | 54.1  | 30.8  | -27.2 | -0.2  |
| RUTOSIDE (rutin)             | 55.9 | 33.7  | -12.6 | -20.1 | 43.5  | 26.2  | -9.3  | 11.6  |
| CHLORAMBUCIL                 | 38.0 | 23.1  | 14.0  | -2.9  | 34.2  | 2.9   | 24.5  | 3.5   |
| MECAMYLAMINE HYDROCHLORIDE   | 49.6 | 23.5  | 9.0   | -2.7  | 37.0  | 10.5  | 37.0  | 4.4   |
| PRAMOXINE HYDROCHLORIDE      | 65.5 | 15.0  | -11.2 | -21.4 | 39.1  | -1.1  | 11.0  | 5.3   |
| METHIMAZOLE                  | 43.4 | 10.6  | -13.1 | -16.0 | 39.5  | 10.1  | 15.1  | 20.1  |
| SULOCTIDIL                   | 49.4 | 19.8  | 9.0   | -21.9 | 35.8  | 4.3   | -2.6  | 17.1  |
| MINOXIDIL                    | 23.0 | 11.5  | -9.6  | -12.3 | 42.5  | 9.2   | 12.9  | 21.5  |
| FLUNISOLIDE                  | 31.7 | -17.2 | 18.9  | 9.2   | 31.0  | -15.3 | 5.2   | 27.2  |
| NITROFURANTOIN               | 30.6 | 0.4   | 17.4  | 10.1  | 4.1   | 18.3  | -10.0 | 18.6  |
| CARBENOXOLONE SODIUM         | 49.4 | 24.2  | -0.2  | -13.5 | 60.4  | 40.0  | -18.9 | -0.4  |
| NYLIDRIN HYDROCHLORIDE       | 48.3 | 35.2  | -5.2  | -17.6 | 53.2  | 33.2  | -28.1 | -21.2 |

|                            |      |       |       |       |      |       |        |       |
|----------------------------|------|-------|-------|-------|------|-------|--------|-------|
| VIGABATRIN                 | 56.0 | 28.7  | -1.1  | -20.3 | 44.3 | 22.6  | -0.5   | -1.8  |
| PARGYLINE HYDROCHLORIDE    | 51.9 | 36.4  | -13.6 | -18.8 | 36.5 | 31.6  | 1.8    | 7.8   |
| RIBOFLAVIN                 | 62.7 | 37.5  | -5.5  | -22.8 | 48.8 | 26.3  | -20.9  | -0.3  |
| FENOPROFEN                 | 49.4 | 31.7  | -7.6  | -22.1 | 41.3 | 33.1  | -12.4  | -24.9 |
| CLOMIPRAMINE HYDROCHLORIDE | 43.8 | 21.2  | 13.4  | -7.0  | 34.8 | 12.5  | 25.6   | 8.4   |
| NALBUPHINE HYDROCHLORIDE   | 37.1 | 25.6  | 4.7   | -7.1  | 43.9 | 20.7  | 40.9   | -14.4 |
| PENTETIC ACID              | 56.9 | 23.3  | -14.2 | -20.6 | 25.9 | -0.5  | 16.8   | 10.6  |
| ERYTHROMYCIN               | 98.3 | 97.9  | 99.3  | 37.9  | 77.5 | 65.2  | 39.3   | -28.9 |
| SANGUINARINE SULFATE       | 49.6 | 19.9  | 0.9   | -18.2 | 31.8 | -0.2  | -22.4  | -27.0 |
| AZLOCILLIN SODIUM          | 97.6 | 96.8  | 99.4  | 92.4  | 79.9 | 42.7  | 57.5   | 1.8   |
| SODIUM OXYBATE             | 25.1 | -12.0 | 8.8   | 11.8  | 20.9 | -8.8  | 3.8    | 10.3  |
| TANNIC ACID                | 38.6 | 21.2  | -1.8  | -13.9 | 36.5 | 16.5  | 19.8   | -25.2 |
| ALVERINE CITRATE           | -9.9 | 27.1  | 11.5  | 15.9  | 22.2 | 50.3  | -119.1 | -29.7 |
| CLARITHROMYCIN             | 46.1 | 19.4  | -4.4  | -20.0 | 50.0 | 24.9  | 0.1    | 7.4   |
| AMPHOTERICIN B             | 98.5 | 98.4  | 95.5  | 93.6  | 96.1 | 92.8  | 8.4    | -9.6  |
| BENAZEPRIL HYDROCHLORIDE   | 64.4 | 48.3  | 1.8   | -15.6 | 41.6 | 31.3  | -13.9  | -21.9 |
| AZATHIOPRINE               | 57.5 | 28.1  | -13.9 | -20.7 | 44.1 | 23.4  | -8.2   | 0.5   |
| ACEDAPSONE                 | 57.4 | 36.4  | -0.3  | -21.6 | 49.1 | 36.1  | -14.7  | 8.1   |
| BETHANECHOL CHLORIDE       | 45.5 | 31.3  | 0.3   | -15.8 | 43.9 | 10.0  | 29.4   | 23.1  |
| PREGABALIN                 | 55.8 | 36.4  | 13.3  | -8.2  | 38.4 | 12.2  | 23.4   | 10.1  |
| CARBENICILLIN DISODIUM     | 57.7 | 2.9   | -12.3 | -22.3 | 38.6 | 5.5   | 39.3   | 21.0  |
| ZOMEPIRAC SODIUM           | 63.0 | 22.8  | -6.2  | -16.2 | 38.5 | 8.6   | 28.1   | 21.6  |
| CHLORAMPHENICOL PALMITATE  | 40.1 | -9.7  | -10.5 | -15.7 | 45.4 | 0.5   | 6.3    | 18.8  |
| MECHLORETHAMINE            | 59.1 | 10.8  | -0.6  | -14.7 | 42.8 | 13.6  | 2.9    | 7.8   |
| MEPHENESIN                 | 45.8 | -6.1  | 4.8   | -2.6  | 11.1 | -18.1 | 7.4    | 21.2  |
| METHOCARBAMOL              | -6.4 | 2.1   | 31.3  | 25.3  | 9.0  | 28.1  | -15.2  | -13.5 |
| RONIDAZOLE                 | 62.7 | 15.8  | -13.8 | -6.2  | 65.9 | 38.4  | -26.8  | -20.0 |
| MOXALACTAM DISODIUM        | 41.1 | 14.7  | -2.0  | -19.4 | 66.4 | 53.3  | -24.4  | -14.1 |
| FLUMETHASONE               | 52.7 | 30.2  | 3.0   | -9.2  | 45.7 | 21.3  | -1.2   | -26.6 |
| OXYBUTYNIN CHLORIDE        | 50.5 | 38.6  | 5.0   | -20.9 | 49.6 | 30.5  | -21.3  | -22.1 |
| FOLIC ACID                 | 46.6 | 18.2  | -8.3  | -22.7 | 51.3 | 28.9  | -8.8   | -7.6  |
| NYSTATIN                   | 31.0 | 17.2  | 5.1   | -21.0 | 44.7 | 32.7  | -21.0  | 0.9   |
| LOMEFLOXACIN HYDROCHLORIDE | 98.5 | 96.2  | 84.6  | 85.9  | 81.6 | 60.1  | 36.5   | 2.7   |
| PENICILLAMINE              | 29.7 | -0.1  | 12.2  | -8.2  | 42.1 | 18.8  | 17.5   | 7.2   |
| ACEBUTOLOL HYDROCHLORIDE   | 56.1 | 24.7  | -11.4 | -17.5 | 37.5 | 5.4   | 2.0    | 20.6  |
| FLUFENAMIC ACID            | 57.9 | 55.1  | -26.9 | -20.0 | 48.4 | 35.8  | -26.2  | -16.3 |
| PHENFORMIN HYDROCHLORIDE   | 42.6 | 13.6  | -2.3  | -15.5 | 40.8 | 3.2   | 7.0    | 21.7  |
| PROGLUMIDE                 | 28.8 | -4.7  | -1.4  | -19.1 | 40.9 | 20.5  | 14.0   | 17.1  |
| PROSCILLARIDIN             | 20.7 | -3.1  | 15.3  | -14.2 | 27.7 | -17.6 | 13.5   | 23.8  |
| PROMETHAZINE HYDROCHLORIDE | 23.7 | 15.9  | 5.1   | -14.1 | 4.4  | 11.5  | -6.4   | -19.3 |

|                               |      |       |       |       |      |       |       |       |
|-------------------------------|------|-------|-------|-------|------|-------|-------|-------|
| alpha-TOCHOPHEROL             | 47.7 | 25.0  | -0.9  | -11.9 | 60.5 | 48.7  | -7.9  | 7.3   |
| CHOLINE CHLORIDE              | 74.3 | 57.5  | -14.5 | -21.9 | 63.1 | 49.9  | -21.9 | -14.9 |
| ETHYL PARABEN                 | 44.9 | 14.7  | 6.0   | -18.1 | 42.7 | 26.3  | 3.3   | 7.5   |
| CARPROFEN                     | 61.0 | 65.2  | -38.9 | -22.2 | 29.9 | 30.8  | -50.8 | -22.0 |
| AMANTADINE HYDROCHLORIDE      | 47.4 | 15.6  | 1.4   | -21.9 | 51.6 | 34.8  | -11.0 | 13.3  |
| HYDROQUINONE                  | 61.4 | 39.2  | -5.8  | -23.2 | 52.4 | 41.5  | -12.5 | -24.1 |
| AMPICILLIN SODIUM             | 42.2 | -3.2  | 13.4  | -17.8 | 41.5 | 13.5  | 28.3  | -1.2  |
| VALSARTAN                     | 61.2 | 42.0  | 2.0   | -16.0 | 42.1 | 17.3  | 22.9  | -28.0 |
| BACITRACIN                    | 54.9 | 16.8  | 1.3   | -22.0 | 47.3 | 5.9   | 15.6  | -0.2  |
| ATOMOXETINE HYDROCHLORIDE     | 60.1 | 26.0  | -6.7  | -23.0 | 46.4 | 17.6  | 12.7  | -28.4 |
| BISACODYL                     | 38.5 | 2.3   | -0.1  | -21.1 | 44.2 | 12.3  | 15.0  | 16.3  |
| TOPOTECAN HYDROCHLORIDE       | 37.9 | 16.9  | 1.4   | -19.1 | 38.7 | 11.9  | 29.5  | -28.1 |
| CARBINOXAMINE MALEATE         | 26.2 | -7.0  | 15.8  | -7.3  | 12.7 | -15.2 | 16.3  | 21.8  |
| SPARTEINE SULFATE             | 30.2 | 14.6  | -4.7  | -6.2  | 3.4  | 44.3  | -21.9 | -13.7 |
| CHLORAMPHENICOL HEMISUCCINATE | 62.9 | 49.4  | 6.8   | -16.8 | 70.1 | 55.4  | -37.0 | -21.4 |
| MECLIZINE HYDROCHLORIDE       | 75.7 | 59.0  | -17.4 | -19.9 | 63.3 | 52.3  | -28.5 | -27.8 |
| SULFACHLORPYRIDAZINE          | 82.2 | 55.2  | 15.9  | -18.6 | 47.6 | 29.0  | -21.1 | -28.3 |
| METHOTREXATE(+/-)             | 71.7 | 57.0  | 4.2   | -21.9 | 49.3 | 45.7  | -26.3 | -25.9 |
| SULFAMETER                    | 61.7 | 26.8  | 1.9   | -21.4 | 57.6 | 37.3  | -23.2 | -22.6 |
| NADIDE                        | 61.6 | 39.7  | -1.1  | -24.5 | 57.9 | 46.6  | -25.2 | -25.1 |
| XYLAZINE                      | 46.0 | 20.8  | 14.3  | -15.0 | 41.0 | 19.1  | 18.7  | -1.8  |
| NOREPINEPHRINE                | 40.1 | 25.6  | 9.2   | -22.3 | 46.1 | 22.8  | 13.3  | -26.0 |
| PHTHALYLSULFATHIAZOLE         | 52.7 | 32.0  | -3.4  | -19.5 | 41.0 | 12.6  | 19.8  | 7.0   |
| ORPHENADRINE CITRATE          | 58.6 | 34.2  | -0.7  | -16.1 | 34.9 | 19.1  | 9.0   | 10.6  |
| CEFAMANDOLE SODIUM            | 98.3 | 95.7  | 99.0  | 94.4  | 88.7 | 49.2  | 48.1  | 14.5  |
| PHENACEMIDE                   | 41.7 | -6.5  | -5.2  | -18.1 | 40.4 | 18.2  | 5.0   | 13.3  |
| ASPARTAME                     | 25.8 | -11.4 | 23.6  | 20.8  | 22.0 | -6.7  | 9.7   | 27.5  |
| FENBENDAZOLE                  | 28.3 | 8.1   | -11.0 | -17.4 | -3.5 | 10.3  | -23.2 | 1.5   |
| PENFLURIDOL                   | 89.5 | 77.4  | 49.4  | 34.1  | 49.6 | 56.8  | -13.5 | -31.1 |
| MINAPRINE HYDROCHLORIDE       | 54.1 | 37.6  | -5.9  | -22.1 | 58.2 | 43.0  | -19.6 | -24.7 |
| HYDROCORTISONE VALERATE       | 51.0 | 25.4  | 6.3   | -16.5 | 47.4 | 31.1  | -16.4 | -11.4 |
| SCOPOLAMINE HYDROBROMIDE      | 54.5 | 46.7  | 6.7   | -12.5 | 43.3 | 33.4  | -3.2  | -28.0 |
| alpha-TOCHOPHERYL ACETATE     | 43.2 | 14.0  | 10.5  | -22.3 | 49.5 | 30.2  | -12.7 | -12.3 |
| ATORVASTATIN CALCIUM          | 60.8 | 39.6  | -0.8  | -23.0 | 51.6 | 41.9  | -15.8 | -28.4 |
| COUMARIN                      | 38.6 | 10.0  | 13.9  | -8.5  | 39.9 | 11.5  | 15.1  | -21.5 |
| HYDROXYCHLOROQUINE SULFATE    | 43.4 | 21.3  | 18.0  | -23.1 | 42.5 | 16.4  | 22.3  | 3.6   |
| AMIKACIN SULFATE              | 63.6 | 27.7  | -2.1  | -18.2 | 37.8 | 8.5   | 11.4  | 15.7  |
| NATEGLINIDE                   | 59.7 | 31.3  | -7.1  | -10.4 | 49.7 | 20.2  | 28.2  | 8.6   |
| AMPROLIUM                     | 34.2 | -19.2 | -2.9  | -10.8 | 39.1 | 9.0   | 1.3   | 7.0   |
| SALSALATE                     | 31.0 | 1.5   | 21.2  | -16.0 | 36.0 | 25.7  | 26.8  | -7.7  |

|                                |      |       |       |       |      |       |       |       |
|--------------------------------|------|-------|-------|-------|------|-------|-------|-------|
| BACLOFEN                       | 33.6 | -14.2 | 7.0   | -8.4  | 3.3  | -16.2 | 4.0   | 16.7  |
| DESOXYCORTICOSTERONE ACETATE   | 26.1 | 20.2  | 0.6   | -16.6 | -1.2 | 4.9   | -5.1  | 1.7   |
| BITHIONATE SODIUM              | 91.3 | 84.6  | 65.8  | 33.1  | 87.5 | 62.4  | 66.6  | 21.0  |
| PHENOXYBENZAMINE HYDROCHLORIDE | 64.9 | 52.8  | 1.6   | -19.0 | 53.5 | 32.2  | -16.9 | -12.3 |
| CARISOPRODOL                   | 45.8 | 28.2  | 17.1  | -18.3 | 43.1 | 25.8  | 3.3   | -1.0  |
| TESTOSTERONE PROPIONATE        | 37.1 | 26.2  | 5.8   | -21.0 | 36.3 | 12.4  | 3.0   | -0.1  |
| CHLORAMPHENICOL                | 86.9 | 74.9  | 29.1  | -20.4 | 34.6 | 23.4  | -11.6 | -2.6  |
| MECLOFENAMATE SODIUM           | 63.8 | 65.7  | -0.9  | -22.8 | 40.4 | 32.4  | -12.4 | 1.7   |
| SULFADIMETHOXINE               | 51.0 | 31.2  | 38.3  | -10.8 | 37.6 | 13.0  | 27.7  | 3.5   |
| METHOXAMINE HYDROCHLORIDE      | 41.4 | 36.3  | 16.1  | -18.7 | 43.2 | 17.4  | 18.2  | -14.6 |
| SULFAMETHOXYPIRIDAZINE         | 37.7 | 11.2  | 20.0  | -16.9 | 32.9 | 14.0  | 10.8  | 16.8  |
| NAFCILLIN SODIUM               | 97.5 | 98.1  | 99.5  | 91.7  | 91.9 | 72.3  | 53.2  | 10.9  |
| TOLAZAMIDE                     | 48.5 | 7.4   | 7.7   | -19.3 | 38.8 | 14.8  | 8.0   | 20.2  |
| NORETHINDRONE                  | 33.1 | 14.3  | 7.7   | -15.1 | 25.3 | 26.7  | 3.2   | 9.3   |
| SUCCINYL SULFATHIAZOLE         | 44.9 | -7.1  | 22.5  | -0.8  | 30.5 | -0.7  | 16.4  | 22.3  |
| OXACILLIN SODIUM               | 97.0 | 97.3  | 83.0  | 78.2  | 33.8 | 61.2  | 34.4  | 1.9   |
| CEFMETAZOLE SODIUM             | 61.2 | 22.6  | 0.0   | -21.9 | 42.3 | 20.4  | -11.7 | 1.3   |
| PHENAZOPYRIDINE HYDROCHLORIDE  | 47.1 | 44.3  | 0.8   | -23.6 | 58.5 | 47.9  | -20.1 | -18.0 |
| VARDENAFIL HYDROCHLORIDE       | 60.0 | 33.6  | 5.7   | -19.2 | 40.2 | 24.1  | -7.6  | -5.6  |
| FENSPIRIDE HYDROCHLORIDE       | 39.1 | 35.0  | 11.9  | -22.7 | 40.7 | 31.5  | -2.1  | -4.6  |
| TILORONE                       | 56.0 | 28.0  | 8.2   | -21.7 | 42.7 | 24.7  | -6.3  | 3.4   |
| MEMANTINE HYDROCHLORIDE        | 27.9 | 19.4  | 14.6  | -11.3 | 39.3 | 33.9  | 6.5   | 16.0  |
| REPAGLINIDE                    | 38.8 | 22.2  | 17.7  | 1.6   | 29.5 | 19.4  | 31.1  | 0.1   |
| THEOPHYLLINE                   | 25.3 | 18.7  | 12.2  | -19.9 | 37.6 | 22.6  | 31.6  | 16.8  |
| DACTINOMYCIN                   | 98.4 | 97.7  | 101.0 | 95.8  | 90.1 | 80.9  | 50.2  | 6.8   |
| OXYPHENCYCLIMINE HYDROCHLORIDE | 54.8 | 13.2  | -0.6  | -20.4 | 37.3 | 7.8   | 15.2  | 12.9  |
| ACETAMINOPHEN                  | 39.4 | 2.9   | -1.2  | -9.9  | 35.0 | 16.9  | 11.9  | 6.4   |
| DIRITHROMYCIN                  | 97.4 | 95.9  | 99.9  | 94.4  | 67.0 | 62.9  | -3.4  | -5.1  |
| AMILORIDE HYDROCHLORIDE        | 47.0 | -6.4  | 8.8   | -8.7  | 19.5 | -6.2  | 20.7  | 26.7  |
| CANDESARTAN CILEXIL            | 26.8 | 6.7   | -9.8  | -20.4 | 1.0  | -5.1  | -1.9  | -7.7  |
| ANTAZOLINE PHOSPHATE           | 41.9 | 14.2  | 8.1   | -17.7 | 32.3 | 15.6  | -10.1 | -12.5 |
| HYDROCORTISONE                 | 49.7 | 49.9  | 6.2   | -22.1 | 37.0 | 29.9  | -5.1  | -7.7  |
| BECLOMETHASONE DIPROPIONATE    | 31.8 | 2.6   | 21.9  | -1.1  | 23.4 | 19.2  | 17.3  | -27.5 |
| TRAMADOL HYDROCHLORIDE         | 40.3 | 35.6  | 16.3  | -17.8 | 33.2 | 29.1  | 2.1   | -12.8 |
| BROMOCRIPTINE MESYLATE         | 52.8 | 27.3  | 12.1  | -19.9 | 33.1 | 18.8  | -11.2 | 1.4   |
| PINACIDIL                      | 53.9 | 34.5  | 5.4   | -21.3 | 30.2 | 23.5  | 4.0   | 0.4   |
| CEFADROXIL                     | 53.5 | 11.6  | 18.8  | -16.0 | 44.4 | 21.5  | 29.4  | -6.6  |
| METHIMAZOLE                    | 39.9 | 11.0  | 21.4  | -9.4  | 36.9 | 20.5  | 21.6  | -29.2 |
| CHLORCYCLIZINE HYDROCHLORIDE   | 63.6 | 5.3   | 3.2   | -17.5 | 38.4 | 15.6  | 7.1   | 3.8   |
| MEDRYSONE                      | 47.9 | 10.7  | 10.5  | -19.4 | 38.5 | 16.8  | 7.2   | -20.7 |

|                             |      |       |       |       |      |      |       |       |
|-----------------------------|------|-------|-------|-------|------|------|-------|-------|
| SULFAGUANIDINE              | 62.1 | 11.4  | 2.2   | -18.3 | 39.6 | 20.4 | 23.5  | -3.5  |
| METHYLDOPA                  | 30.6 | -13.7 | 25.2  | -9.6  | 48.6 | 29.7 | 17.0  | -0.4  |
| SUPROFEN                    | 51.3 | 3.1   | 0.2   | -12.7 | 16.6 | -2.4 | -2.3  | 13.0  |
| NALOXONE HYDROCHLORIDE      | 11.6 | 9.2   | 7.4   | -6.7  | -4.6 | 8.2  | 7.2   | -3.1  |
| GALANTHAMINE HYDROBROMIDE   | 51.9 | 31.1  | 6.1   | -16.6 | 38.3 | 17.2 | -15.3 | -15.4 |
| NORETHYNODREL               | 54.7 | 50.0  | 10.1  | -22.3 | 40.4 | 32.7 | -6.5  | -31.2 |
| TRANEXAMIC ACID             | 45.6 | 25.0  | 10.1  | -17.1 | 35.9 | 17.5 | 14.3  | 9.5   |
| OXYBENZONE                  | 41.7 | 38.1  | 22.1  | -22.5 | 39.1 | 33.2 | -13.5 | -10.1 |
| CEFOPERAZONE SODIUM         | 86.9 | 70.1  | 13.6  | -21.0 | 88.0 | 79.6 | 12.6  | 9.7   |
| PHENELZINE SULFATE          | 53.7 | 41.7  | 13.1  | -22.1 | 35.0 | 26.6 | -16.2 | -26.9 |
| FLUORESC EIN                | 35.6 | 8.4   | 8.4   | -17.4 | 38.3 | 17.4 | 20.9  | -16.7 |
| MEFENAMIC ACID              | 36.9 | 46.6  | 0.8   | -17.0 | 26.5 | 21.9 | 9.9   | -25.7 |
| VINCRISTINE SULFATE         | 47.5 | -0.3  | 1.5   | -4.5  | 36.4 | 16.4 | 1.8   | 22.5  |
| ATENOLOL                    | 55.3 | 32.0  | 6.2   | -12.6 | 37.8 | 22.1 | 14.0  | -27.5 |
| CROTAMITON                  | 45.0 | -0.9  | 10.8  | -11.1 | 39.5 | 13.2 | -4.3  | 5.9   |
| TOLNAFTATE                  | 32.6 | -5.4  | 19.0  | -11.0 | 29.4 | 7.5  | 1.7   | -16.0 |
| MITOMYCIN C                 | 98.2 | 95.2  | 82.8  | 84.9  | 60.8 | 24.9 | -0.9  | 7.2   |
| PROPAFENONE HYDROCHLORIDE   | 19.5 | 21.3  | -12.3 | -12.8 | 2.4  | 1.5  | -9.7  | 2.0   |
| ACETAZOLAMIDE               | 80.4 | 55.6  | -4.1  | -20.3 | 36.8 | 23.5 | -30.3 | -23.2 |
| MEPIVACAINE HYDROCHLORIDE   | 61.2 | 56.1  | 8.4   | -21.8 | 33.4 | 30.1 | -11.3 | -9.4  |
| AMINOCAPROIC ACID           | 57.6 | 28.6  | 29.6  | -6.4  | 36.6 | 17.9 | -17.5 | -5.8  |
| ROSIGLITAZONE               | 62.8 | 49.6  | 14.4  | -13.3 | 44.0 | 39.2 | -19.7 | -26.9 |
| ANTHRALIN                   | 57.4 | 31.9  | 3.0   | -21.7 | 45.7 | 22.7 | -9.5  | -14.2 |
| RIFAXIMIN                   | 97.1 | 97.7  | 97.8  | 88.4  | 89.1 | 83.4 | 33.1  | 3.4   |
| BENSERAZIDE HYDROCHLORIDE   | 32.1 | 8.2   | 26.1  | -6.8  | 41.9 | 19.9 | 33.4  | 6.0   |
| TERBINAFINE HYDROCHLORIDE   | 27.7 | 15.1  | 19.7  | -9.5  | 35.8 | 14.4 | 15.2  | 3.5   |
| BUSULFAN                    | 50.9 | 12.1  | 19.9  | -20.8 | 47.3 | 22.4 | 9.8   | -1.5  |
| VERAPAMIL HYDROCHLORIDE     | 38.5 | 12.6  | 30.3  | -0.9  | 40.2 | 28.0 | 13.6  | 19.4  |
| CEFOTAXIME SODIUM           | 46.3 | 6.9   | 28.6  | -11.5 | 56.8 | 24.8 | 37.0  | 9.6   |
| ENILCONAZOLE                | 26.4 | 14.4  | 15.2  | -4.5  | 34.7 | 10.5 | 2.9   | -0.6  |
| CHLORHEXIDINE               | 95.1 | 93.3  | 82.2  | 86.3  | 40.5 | 41.2 | 32.3  | 8.4   |
| MEGESTROL ACETATE           | 17.1 | 17.9  | -2.0  | -11.3 | -1.6 | 20.3 | -6.8  | 3.4   |
| SULFAMONOMETHOXINE          | 40.8 | 18.2  | 11.9  | -18.0 | 44.0 | 31.1 | -28.0 | -30.3 |
| METHYLPREDNISOLONE          | 70.6 | 58.8  | 0.7   | -22.6 | 57.1 | 44.1 | -48.9 | -24.4 |
| SACCHARIN                   | 41.1 | 17.3  | 17.9  | -21.4 | 36.0 | 23.5 | -7.1  | 6.2   |
| NAPHAZOLINE HYDROCHLORIDE   | 46.2 | 36.9  | 14.4  | -16.7 | 32.4 | 32.3 | 2.3   | 2.6   |
| FENRETINIDE                 | 46.6 | -6.6  | 18.1  | -0.8  | 42.7 | 15.7 | -28.1 | -10.6 |
| NORFLOXACIN                 | 99.8 | 99.0  | 99.3  | 94.5  | 89.2 | 77.5 | 17.8  | 3.7   |
| CEPHALEXIN                  | 44.7 | 10.6  | 35.7  | 12.1  | 47.6 | 21.4 | 31.6  | 3.3   |
| OXYMETAZOLINE HYDROCHLORIDE | 41.9 | 37.8  | 6.3   | -8.9  | 32.2 | 21.0 | 24.8  | -4.7  |

|                                 |      |       |       |       |       |      |       |       |
|---------------------------------|------|-------|-------|-------|-------|------|-------|-------|
| OFLOXACIN                       | 97.3 | 96.4  | 95.5  | 94.7  | 91.0  | 66.2 | 31.9  | -2.8  |
| PHENINDIONE                     | 45.2 | -6.0  | 19.5  | -16.1 | 35.0  | 15.7 | 1.0   | 7.1   |
| NIACINAMIDE                     | 43.5 | 12.6  | 11.6  | -9.0  | 39.7  | 15.1 | -2.9  | 7.0   |
| METHACYCLINE HYDROCHLORIDE      | 98.8 | 96.9  | 98.6  | 93.9  | 79.1  | 75.3 | 16.5  | -16.8 |
| OMEPRazole                      | 34.9 | -17.4 | 12.1  | 10.3  | 6.0   | -9.3 | 12.5  | 6.4   |
| CARBETAPENTANE CITRATE          | 17.9 | 7.1   | 6.2   | -16.2 | -1.0  | 12.0 | -14.5 | 1.5   |
| CEFPROZIL                       | 40.2 | 25.3  | 29.8  | -3.2  | 56.6  | 40.6 | -2.8  | -22.5 |
| TRIMETHOBENZAMIDE HYDROCHLORIDE | 61.9 | 55.4  | 4.3   | -19.3 | 35.8  | 36.1 | -12.3 | -26.9 |
| DICHLORVOS                      | 41.5 | 21.2  | 21.8  | -11.8 | 35.8  | 29.0 | -6.9  | 15.2  |
| FLUCONAZOLE                     | 56.2 | 52.5  | 10.6  | -18.9 | 33.6  | 31.1 | 14.4  | -24.9 |
| ACETOHYDROXAMIC ACID            | 47.5 | -7.6  | 18.6  | -21.5 | 35.4  | 11.8 | -8.0  | 2.2   |
| NILUTAMIDE                      | 38.0 | -8.6  | 17.0  | -16.0 | 29.0  | 24.1 | -9.4  | -17.7 |
| AMINOGLUTETHIMIDE               | 34.3 | 19.3  | 26.4  | -14.7 | 34.4  | 19.5 | 22.9  | 1.8   |
| LOSARTAN                        | 37.6 | 17.0  | 20.5  | -13.4 | 27.4  | 23.5 | 32.1  | -25.1 |
| ANTIPYRINE                      | 46.8 | 3.9   | 20.1  | -23.1 | 36.9  | 14.5 | 1.2   | 5.8   |
| CANRENONE                       | 35.0 | 17.9  | -0.5  | -12.1 | 30.8  | 20.2 | 22.7  | -11.6 |
| BENZETHONIUM CHLORIDE           | 99.8 | 97.0  | 100.8 | 95.1  | 56.4  | 27.3 | 21.9  | 10.7  |
| TOPIRAMATE                      | 30.1 | -20.0 | 10.3  | -9.4  | 30.4  | 19.2 | 4.6   | 17.2  |
| CAFFEINE                        | 32.3 | -15.0 | 25.8  | 9.8   | 3.2   | 8.6  | 10.2  | -8.8  |
| PANTOPRAZOLE                    | 14.9 | 12.0  | -1.2  | -12.7 | 0.4   | 9.1  | -22.8 | -2.2  |
| CEPHALOTHIN SODIUM              | 98.5 | 97.3  | 98.9  | 87.6  | 94.4  | 73.1 | 15.6  | 2.0   |
| FIROCOXIB                       | 39.8 | 23.2  | 15.1  | -14.0 | 50.7  | 38.5 | -28.4 | -17.3 |
| CHLOROCRESOL                    | 27.0 | -1.8  | 19.6  | -7.1  | 35.0  | 21.5 | 2.1   | -7.6  |
| MELPHALAN                       | 24.9 | 27.4  | 26.4  | -3.5  | 33.7  | 31.0 | -8.2  | -26.5 |
| SULCONAZOLE NITRATE             | 99.6 | 92.5  | 94.8  | 91.9  | 64.6  | 19.3 | -18.6 | 3.9   |
| METOCLOPRAMIDE HYDROCHLORIDE    | 47.8 | 4.7   | 6.8   | -21.2 | 37.5  | 23.8 | -12.7 | -9.9  |
| ACETANILIDE                     | 22.8 | 15.8  | 23.9  | -8.3  | 17.7  | 20.1 | 37.4  | -25.4 |
| NAPROXEN(+)                     | 28.2 | 26.7  | 25.6  | 4.8   | 31.5  | 18.4 | 3.8   | -2.2  |
| ENALAPRIL MALEATE               | 49.9 | 13.9  | 17.1  | -16.1 | 37.8  | 17.4 | -7.6  | -7.6  |
| NORGESTREL                      | 40.0 | 22.9  | 12.0  | -10.7 | 34.1  | 23.7 | 8.5   | 3.0   |
| OXOLINIC ACID                   | 55.3 | -7.4  | 12.3  | -16.8 | 44.4  | 16.6 | -9.9  | 2.1   |
| OXYPHENBUTAZONE                 | 29.4 | 8.6   | 6.9   | -18.4 | 36.4  | 27.3 | -1.7  | 9.9   |
| BEZAFIBRATE                     | 21.1 | -16.1 | 22.4  | 23.6  | 34.2  | 11.6 | 7.8   | -14.1 |
| PHENIRAMINE MALEATE             | 25.8 | 14.7  | -2.4  | -20.3 | -16.0 | 57.5 | -26.8 | 11.0  |
| PROPRANOLOL HYDROCHLORIDE (+/-) | 18.2 | 1.9   | 17.6  | -14.2 | 41.4  | 18.8 | -27.9 | -24.9 |
| MEFEXAMIDE                      | 48.2 | 47.2  | 9.8   | -19.3 | 61.5  | 50.6 | -28.0 | -26.4 |
| ZOLMITRIPTAN                    | 30.4 | 12.0  | 22.3  | 2.4   | 32.8  | 17.7 | -5.6  | -26.9 |
| PIMOZIDE                        | 49.1 | 33.0  | 21.3  | -18.5 | 31.1  | 21.9 | -11.8 | -27.2 |
| METHYLDOPATE HYDROCHLORIDE      | 25.4 | -6.7  | 19.7  | -17.9 | 38.2  | 24.1 | -23.0 | -27.8 |
| VINBLASTINE SULFATE             | 17.2 | 2.9   | 11.1  | -18.9 | 46.1  | 35.5 | -25.3 | -9.3  |

|                                   |      |       |       |       |       |       |       |       |
|-----------------------------------|------|-------|-------|-------|-------|-------|-------|-------|
| TEMEFOS                           | 20.0 | 15.2  | 25.8  | 9.2   | 38.1  | 19.2  | -4.8  | -12.4 |
| LOVASTATIN                        | 32.3 | 25.8  | 14.5  | -8.6  | 38.9  | 19.7  | 1.6   | -27.8 |
| ACETYLCHOLINE                     | 40.5 | 6.7   | 12.5  | -12.2 | 36.3  | 12.2  | 7.9   | -29.0 |
| AMINOLEVULINIC ACID HYDROCHLORIDE | 26.8 | 16.4  | 11.5  | -20.0 | 36.5  | 18.3  | 8.2   | -19.4 |
| AMINOSALICYLATE SODIUM            | 33.5 | -8.8  | 15.2  | -16.9 | 34.4  | 9.2   | 16.7  | 7.9   |
| HOMOSALATE                        | 20.5 | 8.3   | 9.9   | -9.2  | 34.9  | 18.7  | -15.6 | -19.2 |
| APOMORPHINE HYDROCHLORIDE         | 31.1 | -11.4 | 21.5  | 0.9   | -1.1  | 12.6  | -28.5 | -13.7 |
| MODAFINIL                         | -9.0 | 30.0  | 10.0  | -13.4 | -4.5  | -2.3  | -20.3 | -2.9  |
| BENZOCAINE                        | 40.6 | 18.1  | 11.5  | -16.1 | 45.7  | 27.2  | -25.5 | 22.0  |
| GEMIFLOXACIN MESYLATE             | 99.4 | 98.5  | 97.4  | 93.4  | 85.4  | 73.7  | 29.9  | -9.8  |
| CAMPHOR (1R)                      | 35.0 | 19.0  | 24.0  | -13.0 | 38.0  | 22.2  | -8.8  | 14.0  |
| LOPERAMIDE HYDROCHLORIDE          | 41.9 | 38.3  | 25.9  | -9.0  | 33.7  | 27.6  | 1.3   | -24.2 |
| CEPHAPIRIN SODIUM                 | 81.8 | 14.4  | 32.8  | -3.7  | 94.7  | 78.6  | 41.8  | -0.4  |
| LINDANE                           | 17.7 | 6.6   | 8.2   | 23.0  | 29.3  | 3.6   | -21.5 | 3.3   |
| CHLOROQUINE DIPHOSPHATE           | 25.1 | -14.2 | -0.2  | -5.9  | 28.6  | 4.3   | -33.8 | -0.8  |
| MESTRANOL                         | 16.1 | -5.9  | 4.9   | 0.4   | 20.3  | 5.2   | -33.8 | -1.9  |
| RITODRINE HYDROCHLORIDE           | 20.5 | -25.2 | 13.9  | 0.6   | 40.9  | -0.6  | -29.1 | 0.3   |
| METOPROLOL TARTRATE               | 18.2 | -4.8  | 8.2   | -1.2  | 31.8  | 10.0  | -19.7 | 2.4   |
| FLURANDRENOLIDE                   | 33.3 | -29.0 | 10.4  | 9.7   | 43.9  | -18.9 | -14.4 | 0.1   |
| NEOSTIGMINE BROMIDE               | 18.3 | -8.0  | 9.0   | -2.3  | 39.7  | 5.8   | -4.5  | 0.2   |
| KETOPROFEN                        | 25.9 | -16.6 | 7.6   | 5.9   | 41.4  | -28.9 | 6.6   | 4.2   |
| NORTRIPTYLINE                     | 17.5 | 7.4   | 24.8  | 4.7   | 28.3  | -8.0  | -7.5  | 2.4   |
| CEFOXITIN SODIUM                  | 36.6 | -26.2 | 12.4  | 7.1   | 61.7  | 2.2   | -34.1 | 0.3   |
| OXYTETRACYCLINE                   | 99.1 | 96.4  | 101.1 | 65.4  | 82.9  | 77.7  | 22.7  | -1.3  |
| CETIRIZINE HYDROCHLORIDE          | 59.8 | -15.9 | 22.2  | -0.2  | 27.2  | -22.7 | -7.7  | -2.3  |
| PHENYLBUTAZONE                    | 13.5 | -7.3  | 18.6  | 13.0  | 3.8   | -23.8 | -13.8 | 1.9   |
| METHSCOPOLAMINE BROMIDE           | 11.1 | -24.3 | 8.0   | 8.4   | -11.5 | -54.2 | -5.8  | 2.2   |
| PROBUCOL                          | 47.2 | 4.6   | -1.5  | -3.3  | 20.0  | 11.6  | -14.2 | 0.9   |
| DEBRISOQUIN SULFATE               | 14.6 | -26.8 | 9.7   | 3.9   | 29.7  | 1.2   | -20.0 | 9.4   |
| NICARDIPINE HYDROCHLORIDE         | 47.3 | 10.2  | 0.0   | -4.6  | 36.7  | 28.6  | -4.7  | -2.5  |
| SULFAQUINOXALINE SODIUM           | 94.3 | 71.3  | 15.8  | 2.0   | 33.2  | 6.6   | 1.1   | -1.0  |
| CLEBOPRIDE MALEATE                | 54.0 | 20.2  | 12.7  | -5.8  | 42.4  | 23.9  | -11.8 | 7.2   |
| MITOTANE                          | 52.5 | -5.4  | -2.9  | -9.5  | 31.5  | 3.6   | -7.4  | -2.3  |
| ATROPINE OXIDE                    | 44.6 | 6.7   | -1.7  | -4.3  | 40.5  | 17.8  | 5.9   | -0.8  |
| ACETYLCYSTEINE                    | 31.5 | -7.1  | 31.0  | 10.2  | 22.6  | -6.6  | 31.3  | 15.0  |
| PARAMETHADIONE                    | 39.2 | 16.9  | 19.9  | -7.3  | 28.1  | 10.0  | 27.3  | 4.2   |
| AMITRIPTYLINE HYDROCHLORIDE       | 40.3 | -19.2 | 3.6   | -0.1  | 29.0  | -0.1  | 7.2   | 0.5   |
| SALICYLANILIDE                    | 47.2 | -4.1  | 6.9   | -4.9  | 38.0  | 7.7   | -13.5 | 7.0   |
| ASPIRIN                           | 26.0 | -14.4 | 18.9  | -7.4  | 25.3  | 1.3   | 17.3  | -1.7  |
| CLIOQUINOL                        | 42.5 | 4.6   | 18.5  | -3.6  | 19.9  | -6.0  | -15.6 | 4.7   |

|                                |      |       |      |       |      |       |       |      |
|--------------------------------|------|-------|------|-------|------|-------|-------|------|
| BENZTHIAZIDE                   | 8.3  | -41.4 | 11.9 | 3.1   | 6.3  | -38.1 | 14.0  | 0.5  |
| PRAVASTATIN SODIUM             | 59.5 | 41.1  | 16.4 | -1.2  | 18.8 | 0.5   | 13.0  | 31.2 |
| CAPREOMYCIN SULFATE            | 54.0 | 7.4   | 1.6  | -7.7  | 23.7 | -0.6  | -5.4  | 6.3  |
| PODOFILOX                      | 86.6 | 61.7  | 3.9  | 0.0   | 29.6 | 14.6  | -19.4 | -0.4 |
| CEPHRADINE                     | 65.4 | 19.5  | 15.2 | -7.5  | 42.8 | 21.9  | 14.8  | -0.8 |
| ACRISORCIN                     | 71.5 | 49.8  | 0.7  | -5.9  | 35.7 | 22.0  | 12.7  | 1.1  |
| CHLOROTHIAZIDE                 | 60.6 | 16.2  | 9.8  | -8.7  | 40.3 | 8.5   | 12.6  | -0.1 |
| CHLOROTRIANISENE               | 80.0 | 52.5  | 14.8 | -6.6  | 45.5 | 22.9  | 5.8   | -1.2 |
| OXYQUINOLINE HEMISULFATE       | 44.0 | 0.9   | 23.5 | -5.8  | 32.5 | 13.2  | 9.6   | 2.3  |
| CLEMASTINE                     | 64.5 | 30.7  | 14.2 | -0.3  | 30.3 | 7.7   | 15.3  | 1.3  |
| PIPERAZINE                     | 51.7 | 3.8   | -0.2 | -8.1  | 34.8 | 4.7   | -22.9 | 2.0  |
| CORTISONE ACETATE              | 56.5 | 25.7  | -5.2 | -8.7  | 47.2 | 24.0  | -25.5 | -0.7 |
| PROBENECID                     | 44.8 | -9.2  | 18.5 | -8.4  | 27.5 | 6.8   | -13.2 | -2.1 |
| DACARBAZINE                    | 57.0 | 25.4  | 15.3 | -7.2  | 42.6 | 19.2  | 1.3   | -1.2 |
| PYRANTEL PAMOATE               | 12.0 | -31.0 | 11.3 | -1.7  | 1.0  | -11.4 | 2.8   | -0.6 |
| DEXAMETHASONE SODIUM PHOSPHATE | 55.3 | 17.2  | 20.2 | 15.6  | 20.2 | -6.2  | -3.4  | 27.5 |
| RESORCINOL                     | 59.9 | 27.4  | -0.1 | -6.3  | 27.3 | 9.8   | -21.2 | -1.8 |
| DIETHYLSTILBESTROL             | 68.6 | 39.9  | 30.0 | 0.6   | 19.5 | 19.1  | 0.6   | 4.0  |
| STREPTOZOSIN                   | 62.4 | 20.6  | 17.1 | -8.6  | 38.0 | 20.8  | 2.3   | -1.1 |
| DIPHENYLPYRALINE HYDROCHLORIDE | 67.2 | 34.0  | 9.6  | -8.3  | 30.2 | 16.9  | -7.4  | -0.7 |
| SULFATHIAZOLE                  | 67.6 | 17.7  | 9.1  | -9.2  | 48.2 | 19.8  | -21.5 | -3.5 |
| DYPHYLLINE                     | 67.0 | 32.3  | -3.9 | -9.5  | 43.0 | 15.1  | -17.9 | -2.2 |
| THIMEROSAL                     | 99.1 | 98.1  | 98.0 | 90.7  | 85.1 | 79.3  | 62.5  | 7.3  |
| ESTRADIOL VALERATE             | 44.4 | 1.3   | 4.8  | -8.6  | 24.6 | -6.0  | -1.6  | 4.9  |
| TRIAMCINOLONE                  | 40.9 | 0.3   | 11.4 | -6.0  | 41.3 | 18.8  | -13.6 | -0.8 |
| FLUDROCORTISONE ACETATE        | 49.3 | 8.7   | 3.6  | -8.6  | 31.5 | 6.0   | -6.9  | -3.1 |
| TRIPLENNAMINE CITRATE          | 42.2 | -5.1  | 24.4 | -9.2  | 45.0 | 18.2  | -20.9 | -2.7 |
| GALLAMINE TRIETHIODIDE         | 35.4 | -5.5  | 16.6 | -8.5  | 31.9 | 2.3   | -14.1 | 5.8  |
| VIDARABINE                     | 51.0 | 0.2   | 15.6 | -4.5  | 28.6 | -8.5  | -5.3  | -1.3 |
| HALOPERIDOL                    | 46.6 | 7.6   | -0.5 | -4.5  | 36.7 | 10.6  | 2.7   | 5.7  |
| THEOBROMINE                    | 65.2 | 27.4  | 3.2  | -3.5  | 17.6 | -0.2  | -6.9  | -1.1 |
| HYDROCORTISONE HEMISUCCINATE   | 64.0 | 33.4  | -3.6 | -8.3  | 39.0 | 22.5  | -5.7  | -1.9 |
| OUABAIN                        | 67.6 | 39.4  | 13.6 | -10.8 | 40.0 | 17.1  | -7.9  | -2.6 |
| INDOMETHACIN                   | 55.3 | 33.1  | 7.2  | -8.8  | 38.0 | 23.9  | -7.2  | -1.2 |
| CEFACLOR                       | 85.3 | 57.0  | 20.9 | -0.3  | 82.1 | 63.2  | -1.2  | -3.2 |
| KANAMYCIN A SULFATE            | 63.1 | 27.0  | 2.1  | -10.1 | 34.5 | 14.8  | -1.5  | -1.8 |
| CANRENOIC ACID, POTASSIUM SALT | 49.6 | -6.8  | 15.1 | -7.9  | 31.6 | -0.4  | 13.4  | 1.8  |
| METHICILLIN SODIUM             | 98.9 | 97.1  | 90.1 | 75.8  | 94.7 | 67.8  | 34.2  | -0.9 |
| FLUMEQUINE                     | 95.2 | 82.6  | 58.6 | 43.5  | 64.2 | 46.0  | -8.8  | -1.6 |
| CHLOROXYLENOL                  | 46.7 | 4.4   | 10.0 | -7.4  | 37.9 | 19.7  | -22.8 | -0.6 |

|                                           |       |       |       |       |      |       |       |      |
|-------------------------------------------|-------|-------|-------|-------|------|-------|-------|------|
| PENICILLIN G POTASSIUM                    | 99.7  | 96.2  | 96.5  | 92.3  | 77.5 | 46.2  | 34.3  | 5.2  |
| CLIDINIUM BROMIDE                         | 39.6  | -22.4 | 19.5  | -6.4  | 23.5 | 13.4  | 0.0   | 5.6  |
| PIROXICAM                                 | 30.9  | -21.9 | 12.5  | 0.5   | 16.5 | -20.0 | -23.4 | 6.3  |
| COTININE                                  | 56.8  | 19.1  | -2.6  | -9.2  | 13.1 | -3.5  | 5.0   | 11.1 |
| PROCAINAMIDE HYDROCHLORIDE                | 82.7  | 49.2  | 2.2   | -8.4  | 26.4 | 8.0   | -1.7  | -2.2 |
| DANAZOL                                   | 65.1  | 39.6  | -19.0 | -8.6  | 27.4 | 21.8  | -14.5 | -0.3 |
| PYRAZINAMIDE                              | 79.9  | 46.6  | 11.4  | -7.7  | 47.8 | 20.0  | -0.7  | 4.0  |
| DEXTROMETHORPHAN HYDROBROMIDE             | 67.3  | 42.5  | -3.6  | -9.0  | 37.9 | 32.7  | 2.6   | -0.8 |
| RIFAMPIN                                  | 99.5  | 97.6  | 101.0 | 94.8  | 90.3 | 82.4  | 23.2  | -2.2 |
| DIFLUNISAL                                | 66.0  | 35.2  | 1.7   | -10.0 | 36.8 | 17.6  | -5.1  | -1.0 |
| SULFABENZAMIDE                            | 70.5  | 20.7  | 26.6  | 5.2   | 34.3 | 3.3   | 20.8  | 1.3  |
| DIPYRIDAMOLE                              | 45.1  | -5.0  | 25.9  | -8.4  | 33.7 | 22.4  | 16.1  | 1.1  |
| SULFINPYRAZONE                            | 68.2  | 14.6  | 19.1  | 1.3   | 35.8 | 2.6   | -5.9  | 2.0  |
| TRISODIUM ETHYLENEDIAMINE<br>TETRACETATE  | 45.1  | 10.1  | 12.0  | -7.5  | 30.4 | 18.0  | -3.3  | -4.1 |
| THIOGUANINE                               | 70.3  | 10.7  | 9.9   | -8.7  | 34.7 | -0.5  | -3.3  | -0.8 |
| ESTRIOL                                   | 92.4  | 78.1  | 48.5  | 36.3  | 59.5 | 52.9  | 16.8  | -0.4 |
| TRIAMCINOLONE ACETONIDE                   | 99.9  | 94.2  | 90.2  | 90.3  | 69.7 | 15.7  | 36.5  | 1.9  |
| FLUMETHAZONE PIVALATE                     | 59.6  | 26.8  | 7.4   | -10.0 | 32.3 | 11.8  | -11.0 | -4.0 |
| TRIPROLIDINE HYDROCHLORIDE                | 51.4  | 8.4   | -7.1  | -8.2  | 5.8  | 0.0   | 7.0   | 29.9 |
| GEMFIBROZIL                               | 74.9  | 34.9  | 0.2   | -9.3  | 26.2 | 2.4   | -23.7 | -3.0 |
| WARFARIN                                  | 60.1  | 28.0  | -7.5  | -9.3  | 24.9 | 11.9  | -28.8 | -2.4 |
| HETACILLIN POTASSIUM                      | 96.7  | 98.4  | 98.5  | 79.8  | 82.7 | 67.1  | 31.3  | -2.4 |
| STRYCHNINE                                | 73.4  | 14.6  | 1.8   | -10.6 | 40.3 | 12.0  | -2.5  | -1.7 |
| HYDROCORTISONE PHOSPHATE<br>TRIETHYLAMINE | 62.8  | 20.6  | 12.5  | -10.5 | 38.2 | 16.8  | -6.9  | -1.9 |
| ALBUTEROL (+/-)                           | 57.8  | 9.3   | 17.8  | -7.8  | 38.5 | 13.8  | 16.7  | -1.5 |
| INDOPROFEN                                | 39.9  | -4.5  | 19.4  | -6.6  | 25.4 | 14.3  | 7.6   | 3.9  |
| IODIPAMIDE                                | 51.4  | -3.9  | 15.2  | -7.0  | 44.0 | 32.1  | 4.0   | -0.4 |
| KETOCONAZOLE                              | 80.1  | 34.5  | 14.3  | -7.1  | 33.9 | 7.6   | -19.7 | 0.3  |
| CHENODIOL                                 | 40.0  | -7.1  | 2.7   | -7.1  | 28.9 | 7.2   | -33.4 | -2.1 |
| METHOXSALEN                               | 46.2  | -1.4  | 18.4  | -4.4  | 20.0 | 10.6  | 12.7  | -1.6 |
| FLUNARIZINE HYDROCHLORIDE                 | 54.8  | -34.7 | 26.4  | 2.0   | 16.8 | -33.1 | -20.2 | -1.7 |
| CHLORPHENIRAMINE (S) MALEATE              | 97.3  | 95.1  | 79.6  | 83.8  | 80.7 | 71.3  | 21.4  | -1.1 |
| PENICILLIN V POTASSIUM                    | 99.5  | 97.1  | 97.7  | 88.5  | 83.7 | 65.2  | 41.0  | -1.6 |
| CLINDAMYCIN HYDROCHLORIDE                 | 100.4 | 98.4  | 98.9  | 97.3  | 76.1 | 62.6  | 15.9  | -2.0 |
| POLYMYXIN B SULFATE                       | 49.6  | -27.2 | 7.4   | -7.4  | 56.8 | 30.7  | -9.9  | 1.1  |
| CRESOL                                    | 73.2  | 38.4  | -7.4  | -9.9  | 15.9 | 25.0  | 31.2  | -0.5 |
| PROCAINE HYDROCHLORIDE                    | 69.8  | 26.4  | -7.1  | -10.5 | 55.9 | 27.0  | -22.3 | -3.4 |
| DAPSONE                                   | 66.1  | 37.7  | 2.1   | -10.0 | 49.0 | 29.2  | -26.3 | -1.6 |

|                              |       |       |       |       |      |       |       |      |
|------------------------------|-------|-------|-------|-------|------|-------|-------|------|
| PYRILAMINE MALEATE           | 50.4  | 15.2  | 28.4  | -5.3  | 28.2 | 2.8   | 27.1  | 1.5  |
| DIBENZOTHIOPHENE             | 46.4  | 13.8  | 32.4  | -7.4  | 34.6 | 16.2  | 17.7  | 4.0  |
| ROXARSONE                    | 42.2  | 3.8   | 10.8  | -6.7  | 49.0 | 16.2  | -2.5  | 0.1  |
| DIGITOXIN                    | 39.3  | 5.9   | 10.3  | -7.4  | 46.2 | 23.7  | -4.3  | -1.5 |
| SULFACETAMIDE                | 44.5  | -10.9 | 34.2  | -6.3  | 22.9 | 6.4   | 20.0  | -3.4 |
| PYRITHIONE ZINC              | 68.7  | 36.5  | 32.1  | -6.4  | 62.5 | 31.4  | -17.6 | 0.1  |
| SULFISOXAZOLE                | 59.7  | -18.1 | 35.6  | 2.1   | 14.3 | -18.8 | 14.6  | 6.1  |
| EMETINE                      | 54.5  | -14.4 | 1.0   | -9.4  | 10.2 | -12.8 | 10.9  | 20.4 |
| THIORIDAZINE HYDROCHLORIDE   | 63.9  | 16.4  | 7.2   | -8.4  | 19.1 | 16.5  | -2.3  | -2.4 |
| ESTRONE                      | 57.0  | 7.3   | 2.6   | -9.1  | 25.6 | 10.3  | -1.2  | -1.1 |
| TRIAMCINOLONE DIACETATE      | 52.6  | 11.8  | 15.1  | -6.4  | 27.2 | 15.6  | 0.3   | 0.0  |
| FLUOCINOLONE ACETONIDE       | 61.7  | 20.8  | 2.4   | -9.8  | 28.5 | 25.2  | 4.8   | -3.0 |
| TROPICAMIDE                  | 69.0  | 19.3  | 8.6   | -10.6 | 39.3 | 14.2  | -9.2  | -1.3 |
| GENTAMICIN SULFATE           | 59.1  | 12.7  | 14.0  | -10.0 | 39.7 | 24.6  | 1.3   | -5.4 |
| XYLOMETAZOLINE HYDROCHLORIDE | 49.9  | 7.6   | 26.6  | -6.4  | 32.1 | 3.0   | 20.7  | -3.4 |
| HEXACHLOROPHENE              | 100.2 | 97.1  | 95.1  | 89.1  | 79.3 | 59.5  | 76.8  | 10.6 |
| ACONITINE                    | 47.5  | -6.7  | 23.4  | -3.6  | 31.9 | 12.0  | 0.9   | 0.9  |
| HYDROFLUMETHIAZIDE           | 46.3  | 8.0   | 27.3  | 0.7   | 33.2 | 24.1  | -5.2  | -3.3 |
| ARECOLINE HYDROBROMIDE       | 41.8  | -7.8  | 20.0  | -7.0  | 30.4 | 10.0  | -13.1 | -0.8 |
| INOSITOL                     | 36.0  | 7.8   | 24.5  | -9.1  | 24.9 | 9.8   | 18.2  | -1.1 |
| LIOTHYRONINE                 | 46.3  | -13.0 | 10.5  | 3.7   | 14.0 | -20.3 | -6.6  | 2.9  |
| LACTULOSE                    | 65.1  | 16.5  | 0.4   | -10.3 | 6.8  | 6.0   | 2.0   | 14.6 |
| CHOLECALCIFEROL              | 71.8  | 35.2  | -7.8  | -10.9 | 15.9 | 4.0   | -17.2 | -1.0 |
| METHYLERGONOVINE MALEATE     | 72.9  | 37.7  | -2.6  | -10.8 | 32.4 | 19.5  | -69.4 | -2.3 |
| FLUPHENAZINE HYDROCHLORIDE   | 69.8  | 30.1  | 6.6   | -11.0 | 31.2 | 18.7  | -11.4 | -2.9 |
| CHLORPROMAZINE               | 63.3  | 37.9  | 8.5   | -8.5  | 31.6 | 22.9  | -3.9  | -3.2 |
| PHENOLPHTHALEIN              | 57.8  | 14.9  | 17.6  | -9.4  | 41.2 | 15.4  | -10.1 | -2.7 |
| CLOMIPHENE CITRATE           | 91.9  | 78.9  | 51.2  | 24.2  | 41.5 | 11.9  | 1.4   | -4.7 |
| PRAZICQUANTEL                | 55.1  | -5.4  | 17.6  | -4.3  | 30.5 | 1.4   | 4.9   | 1.2  |
| CROMOLYN SODIUM              | 46.5  | -11.8 | 22.1  | -8.2  | 33.6 | 7.4   | 16.5  | -3.2 |
| PROCHLORPERAZINE EDISYLATE   | 48.6  | 4.9   | 22.6  | 5.1   | 32.8 | 21.0  | -8.4  | 0.9  |
| DAUNORUBICIN                 | 72.5  | 32.9  | 16.6  | -7.8  | 33.5 | 10.3  | -4.8  | 0.2  |
| PYRIMETHAMINE                | 42.3  | -7.1  | 30.0  | -5.7  | 31.9 | 10.4  | -4.4  | 0.0  |
| DIBUCAINE HYDROCHLORIDE      | 36.8  | -4.2  | 20.8  | 12.6  | 32.1 | 17.7  | 5.1   | 0.6  |
| SALICYL ALCOHOL              | 39.4  | -37.9 | 21.6  | -4.2  | -1.7 | -18.9 | -2.8  | -1.6 |
| DIGOXIN                      | 58.4  | 55.7  | -16.1 | -9.0  | -2.4 | 30.3  | -18.1 | 1.2  |
| SULFADIAZINE                 | 70.4  | 36.6  | 8.0   | -9.9  | 41.0 | 26.3  | -25.4 | -2.7 |
| DISOPYRAMIDE PHOSPHATE       | 89.7  | 71.1  | -25.5 | -9.2  | 31.1 | 19.4  | -12.3 | -4.1 |
| SULINDAC                     | 62.9  | 14.3  | 6.5   | -8.7  | 37.7 | 16.2  | -4.6  | -3.0 |
| ADRENALINE BITARTRATE        | 85.1  | 64.1  | -3.5  | -6.2  | 41.3 | 31.7  | 2.1   | -4.0 |

|                              |       |       |       |       |      |       |       |      |
|------------------------------|-------|-------|-------|-------|------|-------|-------|------|
| THIOTHIXENE                  | 62.7  | 3.7   | 14.0  | -9.9  | 44.3 | 20.0  | -10.0 | -2.3 |
| ETHACRYNIC ACID              | 76.9  | 50.4  | -12.8 | -11.0 | 56.1 | 33.7  | -22.1 | -2.2 |
| TRIAMTERENE                  | 53.8  | 7.4   | 23.2  | -8.7  | 33.4 | 15.8  | 2.4   | -0.6 |
| FLUOCINONIDE                 | 66.4  | 25.0  | 6.7   | -9.1  | 32.6 | 13.2  | 7.4   | 2.3  |
| TRYPTOPHAN                   | 38.9  | -3.5  | 11.1  | -8.8  | 36.7 | 14.3  | -5.7  | 2.1  |
| GENTIAN VIOLET               | 71.4  | 100.0 | 100.5 | 92.2  | 63.1 | 59.6  | -0.6  | -3.1 |
| ACETARSOL                    | 39.0  | -12.4 | 27.5  | -6.1  | 31.6 | 10.4  | 1.2   | -1.6 |
| HEXYLRESORCINOL              | 37.8  | 0.7   | 29.3  | 4.7   | 34.1 | 14.7  | -7.3  | 0.3  |
| YOHIMBINE HYDROCHLORIDE      | 17.5  | -33.9 | 17.1  | -5.8  | 3.9  | -15.0 | 0.7   | 4.6  |
| HYDROXYPROGESTERONE CAPROATE | 57.8  | 13.3  | -2.2  | -10.3 | 32.7 | 20.2  | 8.9   | 41.0 |
| CAPTOPRIL                    | 81.6  | 48.2  | 0.8   | -8.7  | 29.9 | 12.7  | -18.2 | 0.0  |
| IDOQUINOL                    | 56.9  | 30.4  | 10.0  | -8.7  | 56.2 | 41.9  | -8.8  | 0.0  |
| ALLANTOIN                    | 66.6  | 38.4  | 0.1   | -9.4  | 33.7 | 17.3  | 4.0   | -3.4 |
| LEUCOVORIN CALCIUM           | 50.8  | 17.2  | 10.6  | -9.0  | 47.1 | 38.5  | -0.2  | -1.5 |
| CINCHONIDINE                 | 56.3  | 23.3  | 9.8   | -9.2  | 44.8 | 20.7  | 6.9   | -2.4 |
| METHYLTHIOURACIL             | 48.1  | 9.9   | 3.8   | -10.1 | 68.9 | 54.7  | -2.5  | -1.8 |
| FLUTAMIDE                    | 48.1  | 7.9   | 24.7  | -6.7  | 31.1 | 8.7   | 9.1   | 1.2  |
| CHLORPROPAMIDE               | 35.9  | -11.6 | 22.8  | -2.2  | 54.2 | 34.1  | 8.7   | 0.0  |
| PHENYLEPHRINE HYDROCHLORIDE  | 42.1  | -12.8 | 16.4  | -4.8  | 35.8 | 10.2  | -2.2  | -1.3 |
| CLONIDINE HYDROCHLORIDE      | 43.0  | -4.2  | 14.4  | -7.4  | 50.7 | 30.7  | -11.4 | -2.9 |
| PRAZOSIN HYDROCHLORIDE       | 38.5  | -3.4  | 26.5  | 2.6   | 33.4 | 16.1  | -13.1 | -1.8 |
| CYCLIZINE                    | 33.3  | 0.9   | 26.2  | 9.2   | 53.6 | 39.7  | -13.7 | 0.2  |
| PROCYCLIDINE HYDROCHLORIDE   | 33.0  | -33.6 | 19.0  | -3.0  | 5.1  | -11.0 | -3.8  | -1.7 |
| SODIUM DEHYDROCHOLATE        | 55.1  | 22.7  | 2.3   | -9.2  | 11.5 | 0.6   | 6.6   | -0.5 |
| PYRVINIUM PAMOATE            | 100.0 | 98.0  | 99.0  | 94.3  | 49.7 | 0.4   | -64.3 | -4.4 |
| DICLOFENAC SODIUM            | 65.1  | 23.1  | -13.1 | -10.6 | 30.4 | 22.2  | -31.3 | -4.9 |
| SALICYLAMIDE                 | 47.6  | -4.2  | 9.3   | -8.6  | 28.8 | 15.1  | 5.7   | -3.4 |
| DIHYDROERGOTAMINE MESYLATE   | 54.5  | 29.5  | 5.1   | -10.7 | 41.0 | 37.7  | 5.6   | 0.8  |
| SULFAMERAZINE                | 51.3  | 10.4  | 8.8   | -8.6  | 62.1 | 38.9  | -12.3 | -3.5 |
| DISULFIRAM                   | 54.3  | 29.0  | 5.2   | -10.0 | 53.3 | 37.1  | -0.7  | -4.5 |
| TAMOXIFEN CITRATE            | 100.7 | 97.7  | 83.2  | 79.3  | 45.4 | 18.7  | 11.3  | -0.8 |
| EQUILIN                      | 44.1  | -8.0  | 22.6  | -4.7  | 35.4 | 20.3  | -2.2  | 0.5  |
| TIMOLOL MALEATE              | 35.6  | -5.4  | 22.2  | -5.3  | 24.0 | 13.8  | -4.2  | -1.3 |
| ETHAMBUTOL HYDROCHLORIDE     | 43.4  | 1.8   | 25.2  | -1.9  | 30.3 | 18.8  | -2.7  | 0.2  |
| TRICHLORMETHIAZIDE           | 27.7  | 6.1   | 29.4  | -6.5  | 39.8 | 19.6  | 16.4  | -1.2 |
| FLUOROMETHOLONE              | 29.6  | -1.7  | 22.1  | 0.9   | 22.6 | 14.0  | 5.6   | -1.3 |
| TUAMINOHEPTANE SULFATE       | 42.0  | -9.6  | 21.8  | -1.9  | 0.5  | -7.1  | -14.0 | -2.3 |
| GLUCOSAMINE HYDROCHLORIDE    | 52.7  | 7.6   | 4.4   | -8.1  | -0.8 | 16.1  | -16.1 | -2.3 |
| MERBROMIN                    | 77.2  | 43.6  | 1.6   | -10.7 | 33.1 | 22.5  | -30.0 | -4.6 |
| HISTAMINE DIHYDROCHLORIDE    | 58.6  | 24.0  | 11.9  | -8.7  | 28.1 | 17.3  | -11.6 | -1.9 |

|                                      |      |       |       |       |       |       |       |      |
|--------------------------------------|------|-------|-------|-------|-------|-------|-------|------|
| ADENOSINE PHOSPHATE                  | 55.0 | 10.4  | 15.1  | -9.4  | 25.2  | 11.2  | 11.5  | -3.0 |
| HYDROXYUREA                          | 47.2 | 24.3  | 19.6  | -9.1  | 34.7  | 31.0  | 16.2  | -1.5 |
| CIMETIDINE                           | 49.1 | 14.6  | 20.5  | -10.5 | 29.4  | 9.7   | 1.5   | -2.1 |
| IPRATROPIUM BROMIDE                  | 56.0 | 27.0  | 17.7  | -10.4 | 41.2  | 23.0  | -13.9 | -2.6 |
| ALTHIAZIDE                           | 47.7 | -3.5  | 20.6  | -3.6  | 34.0  | 10.5  | 10.6  | -1.6 |
| LEVONORDEFIN                         | 44.2 | -0.3  | 33.3  | 0.7   | 36.6  | 21.5  | 10.6  | 4.8  |
| CINCHONINE                           | 26.3 | -6.3  | 29.2  | -7.4  | 27.1  | 12.4  | -2.1  | 0.1  |
| MICONAZOLE NITRATE                   | 99.3 | 89.7  | 88.4  | 90.1  | 57.0  | 8.7   | -10.2 | -1.6 |
| DROPERIDOL                           | 35.7 | -6.5  | 28.2  | -4.1  | 38.7  | 15.8  | -13.5 | 0.2  |
| CHLORTETRACYCLINE HYDROCHLORIDE      | 98.9 | 97.7  | 95.7  | 89.1  | 78.9  | 67.7  | 39.5  | -1.7 |
| PHENYLPROPANOLAMINE<br>HYDROCHLORIDE | 36.7 | -15.4 | 21.0  | -5.2  | -26.1 | -5.8  | 20.2  | -4.3 |
| CLOTRIMAZOLE                         | 97.3 | 86.8  | 46.3  | 61.3  | 39.9  | -30.5 | -27.3 | -1.5 |
| PREDNISOLONE                         | 63.3 | 15.8  | 6.0   | -10.1 | 21.3  | 6.3   | -8.0  | 0.3  |
| CYCLOPENTOLATE HYDROCHLORIDE         | 73.4 | 47.5  | 10.5  | -11.1 | 27.3  | 21.7  | -49.0 | -2.2 |
| PROMAZINE HYDROCHLORIDE              | 60.8 | 16.3  | 12.7  | -4.3  | 34.1  | 10.4  | 6.4   | -2.3 |
| DEMECLOCYCLINE HYDROCHLORIDE         | 84.4 | 77.2  | 46.5  | 36.6  | 42.8  | 38.5  | -17.2 | -3.1 |
| QUINACRINE HYDROCHLORIDE             | 51.9 | 6.3   | 7.4   | -7.2  | 40.0  | 16.7  | -3.4  | -1.7 |
| DICLOXACILLIN SODIUM                 | 95.3 | 97.7  | 101.0 | 95.8  | 95.9  | 82.8  | 13.0  | -3.5 |
| SODIUM SALICYLATE                    | 49.6 | -1.7  | 25.5  | 0.0   | 35.9  | 11.5  | 9.0   | -2.3 |
| DIHYDROSTREPTOMYCIN SULFATE          | 74.0 | 34.0  | 21.9  | -5.3  | 36.0  | 25.6  | 3.7   | 8.2  |
| SULFAMETHAZINE                       | 41.0 | -20.4 | 13.8  | -4.0  | 37.3  | 8.9   | -3.6  | -0.5 |
| DOPAMINE HYDROCHLORIDE               | 58.7 | -4.8  | 13.4  | -7.7  | 38.1  | 19.4  | 2.2   | 0.1  |
| TERBUTALINE HEMISULFATE              | 36.8 | -18.0 | 27.3  | -2.0  | 32.4  | 5.3   | 6.8   | -2.1 |
| ERGOCALCIFEROL                       | 44.0 | -14.9 | 24.2  | -6.7  | 18.4  | 2.8   | -1.9  | -1.1 |
| TOBRAMYCIN                           | 15.4 | -30.8 | 24.3  | 21.3  | 10.3  | -14.1 | -6.3  | 1.0  |
| ETHINYL ESTRADIOL                    | 45.9 | 4.0   | 13.1  | -5.5  | -10.4 | 29.2  | -27.8 | 4.6  |
| TRIFLUOPERAZINE HYDROCHLORIDE        | 79.9 | 33.1  | -5.8  | -8.4  | 33.7  | 16.8  | -36.4 | 0.0  |
| FLUOROURACIL                         | 59.8 | 26.5  | 10.2  | -10.0 | 25.1  | 17.3  | -27.4 | -4.4 |
| TYROTHRICIN                          | 62.6 | 10.9  | 2.3   | -6.9  | 31.4  | 14.8  | 4.7   | -1.3 |
| GRAMICIDIN                           | 51.5 | -8.0  | 7.9   | -10.0 | 41.5  | 34.5  | 1.1   | -3.3 |
| PHENACETIN                           | 53.3 | -20.9 | 4.9   | -9.8  | 40.9  | 15.8  | 9.7   | -3.9 |
| HOMATROPINE BROMIDE                  | 59.1 | 10.4  | 14.7  | -10.1 | 42.1  | 30.7  | 0.2   | -3.9 |
| KETOTIFEN FUMARATE                   | 33.6 | -6.1  | 33.6  | 7.0   | 31.7  | 7.6   | 17.1  | -0.6 |
| HYDROXYZINE PAMOATE                  | 59.3 | 13.1  | 16.2  | -7.1  | 31.2  | 18.1  | -0.5  | -0.5 |
| CLOZAPINE                            | 29.5 | 0.6   | 15.0  | -6.4  | 23.5  | 13.0  | 0.5   | 0.2  |
| ISONIAZID                            | 49.3 | 9.8   | 18.7  | -7.9  | 31.1  | 13.7  | 3.8   | -2.2 |
| ADENINE                              | 35.9 | 1.2   | 18.0  | 0.3   | 28.4  | 14.2  | 1.8   | 0.2  |
| LINCOMYCIN HYDROCHLORIDE             | 98.9 | 98.3  | 92.1  | 89.3  | 76.2  | 73.1  | 29.4  | -0.5 |
| COENZYME B12                         | 13.6 | -13.0 | 26.3  | 5.8   | -9.0  | -10.8 | 3.3   | 6.4  |

|                               |      |       |      |       |      |       |       |      |
|-------------------------------|------|-------|------|-------|------|-------|-------|------|
| NEOMYCIN SULFATE              | 47.1 | 5.6   | -9.0 | -11.4 | 8.3  | 16.0  | -20.5 | 2.9  |
| FAMOTIDINE                    | 72.0 | 38.3  | 8.8  | -12.6 | 21.7 | 10.9  | 10.3  | 3.1  |
| CHLORTHALIDONE                | 97.1 | 97.6  | 98.4 | 86.4  | 81.0 | 71.6  | 13.2  | -3.4 |
| PHYSOSTIGMINE SALICYLATE      | 96.3 | 98.5  | 98.8 | 85.5  | 63.3 | 61.9  | 43.0  | -2.4 |
| CLOXACILLIN SODIUM            | 97.1 | 98.4  | 96.6 | 87.1  | 75.4 | 54.7  | 41.5  | -0.2 |
| PREDNISOLONE ACETATE          | 40.7 | 5.4   | 7.5  | -7.8  | 38.3 | 16.2  | -3.0  | -0.3 |
| CYCLOPHOSPHAMIDE HYDRATE      | 33.4 | 7.5   | 10.0 | -6.4  | 37.7 | 25.4  | -2.8  | -1.7 |
| PROPANTHELINE BROMIDE         | 49.5 | 2.9   | 31.7 | -3.6  | 31.3 | 13.0  | -19.6 | -2.8 |
| DESIPRAMINE HYDROCHLORIDE     | 35.0 | 2.3   | 33.2 | 6.9   | 27.0 | 15.5  | 13.8  | 0.6  |
| QUINIDINE GLUCONATE           | 49.0 | 11.1  | 24.6 | -5.6  | 32.3 | 15.4  | -24.6 | -1.7 |
| DICUMAROL                     | 66.8 | 44.4  | 44.0 | 6.1   | 41.5 | 26.2  | 13.6  | -1.4 |
| SISOMICIN SULFATE             | 32.9 | -10.2 | 28.6 | -6.0  | 23.0 | 3.0   | 19.3  | -1.4 |
| DIMENHYDRINATE                | 27.3 | -10.3 | 19.0 | 5.6   | 23.6 | 14.0  | -4.8  | 0.2  |
| SULFAMETHIZOLE                | 27.2 | -18.8 | 30.0 | 8.3   | 15.2 | -17.6 | -4.7  | 0.3  |
| DOXEPIN HYDROCHLORIDE         | 36.8 | 6.1   | 10.6 | -7.6  | 16.7 | 42.1  | -8.8  | -2.3 |
| TETRACAINE HYDROCHLORIDE      | 73.1 | 41.0  | 1.3  | -9.4  | 30.2 | 21.1  | -10.7 | -1.7 |
| ERGONOVINE MALEATE            | 61.7 | 44.9  | 10.9 | -8.0  | 30.7 | 31.2  | -16.8 | 2.4  |
| TOLAZOLINE HYDROCHLORIDE      | 45.9 | -7.9  | 11.7 | -8.9  | 43.1 | 32.1  | 4.1   | -2.9 |
| ETHIONAMIDE                   | 42.6 | 10.0  | 17.9 | -6.7  | 40.5 | 34.8  | 0.0   | -0.5 |
| TRIHEXYPHENIDYL HYDROCHLORIDE | 54.5 | 9.0   | 12.0 | -10.8 | 42.8 | 17.6  | 3.5   | -2.3 |
| FLURBIPROFEN                  | 46.1 | 24.8  | 10.9 | 8.9   | 34.1 | 28.8  | 4.8   | -2.1 |
| UREA                          | 46.8 | 7.6   | 22.1 | -7.4  | 32.5 | 21.8  | 10.9  | -0.1 |
| GUAIFENESIN                   | 41.7 | 5.2   | 21.8 | -2.9  | 33.5 | 20.6  | 9.2   | -1.1 |
| PHENYLMERCURIC ACETATE        | 97.5 | 97.8  | 99.5 | 95.0  | 81.4 | 91.5  | 74.6  | 11.9 |
| HOMATROPINE METHYLBROMIDE     | 38.7 | -13.6 | 22.9 | 5.0   | 24.0 | 8.5   | 20.6  | -0.2 |
| BETAHISTINE HYDROCHLORIDE     | 29.3 | -4.2  | 23.1 | 0.0   | 33.1 | 15.6  | -3.9  | -0.9 |
| HYOSCYAMINE                   | 29.6 | 1.0   | 28.3 | 8.2   | 18.3 | 14.7  | 12.8  | 1.5  |
| HYDRASTINE (1R, 9S)           | 37.4 | -19.6 | 14.3 | -5.7  | 15.8 | -7.5  | 9.5   | 14.3 |
| ISOPROPAMIDE IODIDE           | 35.9 | 31.2  | -2.0 | -11.1 | 0.2  | 29.0  | -15.4 | -1.2 |
| AMINACRINE                    | 60.2 | 24.2  | 12.2 | -9.2  | 17.9 | 16.1  | -7.8  | 2.9  |
| MEDROXYPROGESTERONE ACETATE   | 69.2 | 51.1  | 3.2  | -8.2  | 22.2 | 19.9  | -28.1 | 1.0  |
| CHOLESTEROL                   | 49.9 | 8.9   | 14.0 | -10.2 | 27.2 | 13.5  | 7.5   | -2.8 |
| NITROFURAZONE                 | 55.2 | 14.4  | 14.6 | -9.4  | 40.3 | 37.3  | 6.2   | -1.0 |
| ETODOLAC                      | 33.6 | 8.6   | 21.5 | -8.0  | 53.8 | 36.7  | -24.1 | -1.6 |
| CHLORZOXAZONE                 | 34.4 | -5.4  | 29.8 | -7.9  | 37.8 | 29.5  | -0.4  | -4.9 |
| PILOCARPINE NITRATE           | 33.0 | 7.7   | 27.0 | 4.1   | 43.5 | 26.3  | 1.3   | -1.9 |
| CLOXYQUIN                     | 36.4 | 5.9   | 26.6 | -7.1  | 28.0 | 24.6  | 4.7   | -1.2 |
| PREDNISONE                    | 37.1 | -13.7 | 22.1 | -5.1  | 39.0 | 13.4  | -8.8  | -1.2 |
| CYCLOSERINE                   | 33.8 | 6.3   | 10.3 | -2.8  | 27.9 | 20.6  | -4.4  | -1.2 |
| DEXPROPRANOLOL HYDROCHLORIDE  | 39.5 | -9.2  | 21.0 | -7.6  | 38.8 | 13.7  | -7.4  | -2.2 |

|                                |       |       |       |       |       |       |        |      |
|--------------------------------|-------|-------|-------|-------|-------|-------|--------|------|
| DEXAMETHASONE                  | 28.8  | 9.0   | 20.8  | -5.6  | 24.5  | 20.2  | 5.7    | -1.0 |
| QUININE SULFATE                | 23.5  | -23.9 | 33.7  | 0.4   | 7.4   | -17.3 | -18.2  | 0.8  |
| DICYCLOMINE HYDROCHLORIDE      | 50.7  | 14.4  | 6.2   | -7.7  | 12.6  | 35.2  | -14.6  | -0.3 |
| SPECTINOMYCIN HYDROCHLORIDE    | 65.7  | 36.9  | 6.9   | -10.3 | 12.6  | 14.7  | -25.3  | -0.7 |
| DIMETHADIONE                   | 48.1  | 26.6  | 11.9  | -3.4  | 29.5  | 24.2  | -21.4  | -1.6 |
| SULFAMETHOXAZOLE               | 64.9  | 19.1  | 23.7  | -9.7  | 29.8  | 15.2  | -4.2   | -2.0 |
| DOXYCYCLINE HYDROCHLORIDE      | 81.5  | 67.2  | 68.4  | 43.7  | 47.8  | 51.3  | -6.2   | -2.1 |
| TETRACYCLINE HYDROCHLORIDE     | 75.9  | 54.2  | 59.8  | 22.2  | 66.3  | 57.1  | -11.5  | -1.9 |
| ERYTHROMYCIN ETHYLSUCCINATE    | 96.1  | 97.2  | 99.5  | 91.5  | 91.3  | 87.0  | 6.3    | -3.6 |
| TOLBUTAMIDE                    | 42.8  | 5.4   | 26.4  | -8.9  | 29.6  | 13.3  | 10.7   | -2.4 |
| ETHOPROPAZINE HYDROCHLORIDE    | 44.9  | 25.0  | 33.9  | -4.6  | 31.6  | 20.0  | 1.3    | 0.8  |
| TRIMEPAZINE TARTRATE           | 32.0  | 5.9   | 29.3  | -9.9  | 48.6  | 19.5  | -17.2  | -3.5 |
| FURAZOLIDONE                   | 97.0  | 96.8  | 96.7  | 93.9  | 23.1  | 15.9  | 10.8   | 2.9  |
| URSODIOL                       | 22.8  | -1.7  | 20.6  | -8.1  | 40.4  | 12.8  | -1.9   | -2.7 |
| GUANABENZ ACETATE              | 20.1  | 6.1   | 27.2  | 15.4  | 17.7  | 11.7  | -4.4   | 1.7  |
| SULFANILAMIDE                  | 26.3  | -19.8 | 16.9  | 4.5   | -6.5  | -15.1 | -24.6  | -2.0 |
| HYDRALAZINE HYDROCHLORIDE      | 31.8  | 43.7  | 0.5   | -8.6  | -1.7  | 28.7  | -15.7  | -0.5 |
| MOLSIDOMINE                    | 53.9  | 15.0  | 8.7   | -7.4  | -16.1 | 33.9  | -14.0  | -0.2 |
| IBUPROFEN                      | 76.1  | 65.9  | -7.5  | -7.8  | 50.1  | 46.7  | -17.3  | -0.9 |
| LIDOCAINE HYDROCHLORIDE        | 30.9  | 8.4   | 17.4  | -8.0  | -12.8 | 26.0  | 2.4    | 0.9  |
| ISOPROTERENOL HYDROCHLORIDE    | 53.6  | 30.2  | 5.0   | -7.7  | 56.3  | 54.9  | 12.0   | -1.7 |
| BEKANAMYCIN SULFATE            | 77.8  | 47.9  | 58.5  | 28.6  | 26.4  | 37.6  | -12.3  | -2.1 |
| MEPENZOLATE BROMIDE            | 2.4   | 15.2  | -2.8  | -3.0  | -17.3 | -13.2 | -37.2  | 12.5 |
| PIPERINE                       | 21.4  | -9.3  | -77.7 | -3.6  | 12.7  | -8.0  | -166.1 | -4.7 |
| NITROMIDE                      | 2.0   | 1.3   | -15.7 | -2.2  | 24.6  | 15.3  | -40.6  | -1.1 |
| FENOTEROL HYDROBROMIDE         | 8.0   | -22.3 | 4.6   | 1.2   | 18.9  | -7.8  | 10.4   | 3.7  |
| CICLOPIROX OLAMINE             | 8.3   | 7.1   | -9.1  | -3.2  | 19.0  | 2.0   | -0.3   | -0.4 |
| PINDOLOL                       | 42.5  | -10.4 | -5.9  | -3.2  | 23.5  | -2.5  | -6.6   | 11.4 |
| COLCHICINE                     | 29.6  | 0.4   | -7.0  | -3.4  | 37.3  | 16.3  | 5.2    | 1.0  |
| PRIMAQUINE DIPHOSPHATE         | 100.1 | 91.6  | 68.8  | 79.9  | 20.9  | -27.9 | 22.0   | 12.2 |
| CYPROTERONE ACETATE            | -1.1  | -22.3 | 19.7  | 6.4   | 21.0  | -8.4  | 10.4   | 7.1  |
| PROPYLTHIOURACIL               | 37.7  | -20.9 | -17.9 | -2.5  | 32.8  | -3.2  | -28.4  | 0.3  |
| DEXAMETHASONE ACETATE          | -5.3  | -14.3 | -5.5  | -1.7  | 21.8  | 8.4   | -9.5   | -0.3 |
| RACEPHEDRINE HYDROCHLORIDE     | 29.9  | -29.7 | 8.6   | -3.8  | 19.6  | -25.9 | -24.4  | 11.8 |
| DIENESTROL                     | -27.7 | -16.5 | -10.2 | 2.2   | 2.5   | -0.9  | 6.3    | -1.0 |
| SPIRONOLACTONE                 | 38.4  | -31.0 | -10.8 | -1.6  | -0.3  | -50.7 | -12.6  | 42.6 |
| DIOXYBENZONE                   | -8.0  | 5.7   | -7.7  | -0.6  | -6.6  | -16.6 | 2.2    | 30.6 |
| SULFAPYRIDINE                  | 24.6  | 3.9   | -9.8  | -0.6  | 46.8  | 21.1  | -36.6  | 2.7  |
| DOXYLAMINE SUCCINATE           | 51.6  | 39.5  | -12.5 | 5.6   | 42.3  | 27.1  | -24.7  | 0.2  |
| TETRAHYDROZOLINE HYDROCHLORIDE | 25.6  | 6.0   | -3.2  | -2.8  | 43.4  | 9.2   | -2.2   | 6.3  |

|                               |      |       |       |      |      |       |       |      |
|-------------------------------|------|-------|-------|------|------|-------|-------|------|
| ESTRADIOL                     | 27.0 | 17.8  | -0.4  | 0.7  | 32.4 | 16.0  | -6.2  | 8.3  |
| TRANLYCYPROMINE SULFATE       | 40.0 | 2.6   | -9.8  | -4.6 | 56.5 | 23.1  | -2.9  | 4.0  |
| EUCATROPINE HYDROCHLORIDE     | 48.7 | 27.0  | 1.8   | -3.6 | 37.5 | 13.9  | -12.7 | 1.2  |
| TRIMETHOPRIM                  | 98.0 | 96.1  | 85.2  | 84.8 | 57.8 | 34.3  | 6.8   | 0.6  |
| FUROSEMIDE                    | 40.7 | -7.4  | 11.5  | 3.3  | 27.6 | 7.0   | 22.4  | 7.9  |
| VALPROATE SODIUM              | 39.5 | 5.5   | 5.4   | -2.3 | 46.0 | 15.1  | -15.5 | 0.0  |
| GUANETHIDINE SULFATE          | 23.6 | 11.4  | -1.1  | -2.4 | 43.5 | 22.6  | 0.7   | 0.7  |
| AZELAIC ACID                  | 36.4 | -15.0 | 7.5   | -3.0 | 33.7 | 11.5  | 11.6  | -2.9 |
| HYDROCHLOROTHIAZIDE           | 19.4 | -8.2  | 8.2   | -2.2 | 30.7 | 15.1  | -13.0 | 2.8  |
| MYCOPHENOLIC ACID             | 0.5  | -32.0 | 5.8   | 4.9  | 14.7 | -22.7 | 4.3   | 33.6 |
| IMIPRAMINE HYDROCHLORIDE      | 21.6 | 5.1   | 0.7   | -3.6 | 9.6  | -3.1  | 0.0   | 46.1 |
| PHENTOLAMINE HYDROCHLORIDE    | 39.9 | 25.5  | -2.9  | -3.0 | 31.0 | 9.1   | -15.4 | -1.8 |
| ISOSORBIDE DINITRATE          | 52.1 | 44.0  | -9.4  | -3.0 | 57.5 | 43.5  | -21.3 | 0.0  |
| BUDESONIDE                    | 37.0 | 24.3  | -5.9  | -3.4 | 30.1 | 3.9   | 1.4   | -1.2 |
| MERCAPTOPURINE                | 54.7 | 34.3  | -8.5  | -2.6 | 33.7 | 12.7  | -3.2  | 1.9  |
| ETOPOSIDE                     | 80.1 | 53.1  | 13.0  | -5.0 | 47.1 | 20.0  | -5.4  | -0.2 |
| NORETHINDRONE ACETATE         | 58.2 | 29.2  | -15.3 | -5.1 | 40.4 | 6.0   | -27.3 | 0.2  |
| FENBUFEN                      | 42.7 | 0.1   | 0.1   | -4.4 | 19.6 | -3.7  | 27.4  | 3.5  |
| CINOXACIN                     | 51.0 | 16.2  | 6.2   | -4.9 | 25.7 | -9.5  | 29.5  | 3.1  |
| PIPERACILLIN SODIUM           | 61.7 | 39.9  | 37.9  | -4.7 | 71.1 | 45.2  | -7.5  | 2.6  |
| COLISTIMETHATE SODIUM         | 44.3 | 16.1  | 2.0   | -4.5 | 35.7 | 20.4  | -8.8  | 1.8  |
| PRIMIDONE                     | 44.8 | 12.4  | 6.4   | -4.5 | 40.7 | 19.1  | 11.4  | -2.1 |
| CYTARABINE                    | 33.9 | 3.2   | 12.1  | -2.1 | 34.2 | 11.2  | 4.5   | 7.0  |
| PSEUDOEPHEDRINE HYDROCHLORIDE | 4.8  | -24.9 | 15.3  | -0.3 | 26.1 | -3.7  | 9.2   | 2.9  |
| DEFEROXAMINE MESYLATE         | 34.7 | 11.1  | -12.8 | -4.4 | -3.4 | -9.5  | 7.0   | 23.1 |
| RESERPINE                     | 59.5 | 38.1  | -7.2  | -4.5 | 34.3 | 8.7   | -24.8 | -3.2 |
| DIETHYLCARBAMAZINE CITRATE    | 65.1 | 49.9  | -6.0  | -3.9 | 53.4 | 36.0  | -21.7 | 0.2  |
| STREPTOMYCIN SULFATE          | 27.1 | 13.2  | -0.7  | -4.4 | 39.1 | 5.0   | -0.7  | -1.7 |
| DIPHENHYDRAMINE HYDROCHLORIDE | 46.2 | 22.3  | 1.9   | -5.0 | 34.3 | 15.9  | 19.2  | -2.1 |
| SULFASALAZINE                 | 50.5 | 31.8  | -7.5  | -6.2 | 39.5 | 4.0   | -3.2  | -1.6 |
| DYCLONINE HYDROCHLORIDE       | 71.9 | 46.4  | -7.1  | -5.7 | 45.2 | 19.3  | 10.3  | -1.2 |
| THIABENDAZOLE                 | 46.6 | 10.7  | 18.1  | -2.8 | 27.6 | -3.2  | 14.7  | 4.4  |
| ESTRADIOL CYPIONATE           | 39.0 | 15.4  | 17.4  | -4.4 | 36.3 | 10.2  | 10.5  | 3.7  |
| TRIACETIN                     | 40.1 | 2.0   | 8.4   | -3.0 | 38.2 | 17.1  | -13.5 | 0.3  |
| EUGENOL                       | 42.8 | 13.3  | 4.8   | -4.5 | 41.6 | 26.3  | -1.6  | 0.7  |
| TRIOXSALEN                    | 39.4 | 6.9   | 14.7  | -4.6 | 45.1 | 7.2   | 7.2   | -1.8 |
| FUSIDIC ACID                  | 96.8 | 96.2  | 94.7  | 91.6 | 91.0 | 79.0  | -0.7  | -1.6 |
| VANCOMYCIN HYDROCHLORIDE      | 96.2 | 92.3  | 95.3  | 95.9 | 21.7 | -9.7  | -13.9 | 19.3 |
| HALAZONE                      | 23.7 | 12.9  | 8.3   | -2.6 | 10.3 | -11.1 | -2.6  | 19.7 |
| PHENETHICILLIN POTASSIUM      | 98.8 | 98.4  | 100.1 | 84.9 | 77.3 | 43.0  | 30.1  | -1.7 |

|                                   |      |       |       |      |      |       |       |      |
|-----------------------------------|------|-------|-------|------|------|-------|-------|------|
| HYDROCORTISONE ACETATE            | 56.0 | 23.6  | -3.7  | -3.7 | 66.1 | 37.9  | -23.0 | 1.3  |
| OLEANDOMYCIN PHOSPHATE            | 75.8 | 53.8  | 22.1  | -4.7 | 43.5 | 13.3  | -3.9  | -2.6 |
| INDAPAMIDE                        | 37.1 | 16.8  | 4.4   | -0.9 | 46.1 | 16.9  | -7.8  | -0.4 |
| BUTAMBEN                          | 53.8 | 34.1  | 4.6   | -6.6 | 45.3 | 7.1   | -11.1 | -0.6 |
| ISOXSUPRINE HYDROCHLORIDE         | 44.9 | 24.4  | -0.8  | -3.8 | 54.3 | 28.3  | -21.3 | -0.2 |
| BRUCINE                           | 26.3 | 10.7  | 27.8  | -3.7 | 31.8 | 2.2   | 21.6  | 3.1  |
| METHENAMINE                       | 37.1 | 25.9  | 8.4   | 0.8  | 29.8 | 0.1   | 33.0  | 7.7  |
| DEHYDROCHOLIC ACID                | 35.1 | 0.4   | 14.5  | -2.0 | 39.4 | 11.0  | 1.1   | 1.0  |
| OXIDOPAMINE HYDROCHLORIDE         | 50.7 | 18.1  | 1.4   | -3.3 | 70.6 | 48.5  | -26.5 | -0.4 |
| MEBEVERINE HYDROCHLORIDE          | 55.7 | -20.9 | 17.1  | -3.2 | 33.1 | 20.6  | 18.9  | -0.9 |
| ACECLIDINE                        | 21.4 | -18.5 | 19.3  | -1.6 | 44.4 | 18.2  | -13.6 | 2.6  |
| BUPROPION                         | 8.6  | -50.0 | 26.1  | -1.8 | 13.7 | -6.0  | 14.0  | 13.4 |
| MESNA                             | 6.6  | 14.0  | 10.8  | -2.1 | 10.2 | -13.1 | -4.9  | 8.4  |
| ROFECOXIB                         | 47.9 | 6.1   | -2.0  | -4.3 | 61.4 | 27.7  | -25.8 | -2.8 |
| CARBOPLATIN                       | 52.4 | 41.4  | -0.3  | -3.5 | 72.5 | 51.7  | -49.7 | -1.0 |
| ORLISTAT                          | 39.8 | 11.6  | 7.4   | -3.8 | 49.9 | 17.0  | -0.4  | 0.5  |
| CYCLOSPORINE                      | 38.9 | 32.4  | 9.1   | -3.0 | 43.7 | 17.0  | -0.5  | 1.0  |
| ESTROPIPATE                       | 59.8 | 39.3  | 4.2   | -6.5 | 61.9 | 32.9  | -11.1 | -1.0 |
| BIOTIN                            | 50.2 | 26.2  | 1.6   | -4.4 | 51.5 | 29.2  | -14.4 | -0.2 |
| EZETIMIBE                         | 38.0 | 8.0   | 12.3  | -1.8 | 25.8 | -7.3  | 15.6  | 2.7  |
| AMIPRILOSE                        | 30.3 | 21.6  | 28.0  | 0.1  | 34.1 | 17.0  | 8.1   | 3.2  |
| CILOSTAZOL                        | 46.3 | 17.2  | 7.6   | -3.2 | 47.4 | 12.2  | -7.6  | -0.1 |
| TRAZODONE HYDROCHLORIDE           | 58.1 | 29.6  | 15.6  | -3.6 | 39.6 | 20.5  | -0.7  | -2.6 |
| CHLOROPHYLLIDE Cu COMPLEX Na SALT | 46.7 | 11.9  | 1.8   | -3.7 | 45.5 | 0.3   | -29.6 | -0.4 |
| DOBUTAMINE HYDROCHLORIDE          | 15.6 | -7.5  | 19.0  | -2.0 | 39.5 | 21.5  | 8.8   | 4.3  |
| KETANSERIN TARTRATE               | 12.2 | -50.8 | 26.1  | -0.9 | 33.2 | -0.7  | -4.3  | 4.2  |
| HYCANTHONE                        | 40.2 | 26.4  | -1.9  | -5.4 | 34.4 | 3.7   | -3.1  | -1.1 |
| BISMUTH SUBSALICYLATE             | 26.7 | 14.5  | 5.5   | -6.9 | 4.5  | -6.5  | -8.9  | 1.3  |
| AMSACRINE                         | 47.1 | 20.9  | -6.8  | -6.4 | 44.0 | 16.6  | -23.9 | -3.3 |
| D-LACTITOL MONOHYDRATE            | 56.0 | 45.8  | 14.7  | -5.7 | 41.4 | 20.5  | -21.9 | -2.6 |
| ROXITHROMYCIN                     | 97.7 | 98.4  | 99.0  | 94.4 | 74.0 | 67.9  | -8.4  | -2.4 |
| SULFISOXAZOLE ACETYL              | 56.2 | 25.5  | 0.7   | -5.5 | 48.7 | 15.7  | -21.1 | -1.0 |
| OXIBENDAZOLE                      | 67.2 | 51.8  | -8.3  | -4.8 | 42.3 | 20.1  | -14.3 | -2.1 |
| NETILMICIN SULFATE                | 50.8 | 22.2  | 24.0  | -4.2 | 33.4 | 2.5   | 12.9  | 2.8  |
| NIMODIPINE                        | 56.4 | 32.0  | 19.9  | -4.3 | 30.3 | 5.0   | 14.8  | 1.8  |
| NORGESTIMATE                      | 29.7 | 6.1   | -19.9 | -5.4 | 33.7 | 8.8   | -27.0 | -1.2 |
| TERFENADINE                       | 44.5 | 8.8   | 13.2  | -2.2 | 39.5 | 14.9  | -21.6 | 0.1  |
| AMINOPENTAMIDE                    | 60.9 | 23.4  | 12.5  | -3.2 | 42.0 | 17.1  | 2.7   | 1.0  |
| PACLITAXEL                        | 64.0 | 41.4  | -2.2  | -5.0 | 41.8 | 25.9  | -11.4 | 1.4  |
| ROLIPRAM                          | 41.0 | -18.4 | 19.3  | -2.4 | 19.3 | -19.7 | -15.7 | 2.9  |

|                             |      |       |      |      |      |       |       |      |
|-----------------------------|------|-------|------|------|------|-------|-------|------|
| TACROLIMUS                  | 27.6 | 12.5  | 4.3  | -5.8 | -0.6 | -2.1  | -22.5 | -0.4 |
| EPIRUBICIN HYDROCHLORIDE    | 82.3 | 64.3  | 11.9 | -5.7 | 65.4 | 33.9  | -40.7 | -3.9 |
| CAPSAICIN                   | 65.7 | 52.0  | -5.0 | -4.4 | 49.9 | 26.9  | -11.6 | -2.0 |
| CEFUROXIME AXETIL           | 60.1 | -1.7  | 18.5 | -3.4 | 78.4 | 53.3  | -1.6  | -1.8 |
| TRETINON                    | 52.0 | 15.1  | 7.5  | -4.5 | 38.0 | 16.7  | -13.1 | -2.8 |
| SIMVASTATIN                 | 58.5 | 44.3  | -1.0 | -6.2 | 56.1 | 22.5  | -22.8 | -2.0 |
| CISPLATIN                   | 55.1 | 32.9  | 12.3 | -3.7 | 47.4 | 22.0  | -26.1 | -0.7 |
| MOXIFLOXACIN HYDROCHLORIDE  | 99.1 | 97.7  | 89.6 | 84.1 | 89.6 | 54.9  | 36.5  | 1.0  |
| ASCORBIC ACID               | 44.2 | 7.1   | 25.8 | -2.8 | 39.7 | 15.7  | 10.1  | 0.9  |
| CLAVULANATE LITHIUM         | 68.7 | 26.9  | 34.8 | -1.8 | 81.9 | 58.1  | -1.8  | 0.4  |
| AKLOMIDE                    | 46.7 | 11.2  | 15.1 | -4.3 | 29.9 | 17.9  | -11.7 | -1.6 |
| OLMESARTAN MEDOXOMIL        | 44.5 | 17.2  | 16.5 | -5.3 | 50.7 | 11.2  | -17.2 | -0.8 |
| TIAPRIDE HYDROCHLORIDE      | 25.8 | -0.8  | 17.4 | -2.3 | 33.0 | 6.1   | -24.8 | 0.6  |
| CITICOLINE                  | 29.0 | -22.3 | 27.2 | -3.9 | 23.7 | -18.5 | -0.2  | 7.5  |
| MENTHOL(-)                  | 12.4 | 5.8   | 2.8  | -4.3 | 1.0  | -25.4 | -3.6  | 9.8  |
| BIFONAZOLE                  | 92.1 | 65.9  | 21.6 | -5.4 | 59.4 | 0.9   | -67.5 | -4.4 |
| EDOXUDINE                   | 57.9 | 52.0  | -2.5 | -5.5 | 35.4 | 18.6  | -32.7 | -3.9 |
| FIPRONIL                    | 56.7 | 31.8  | 0.6  | -3.5 | 29.1 | 1.4   | -18.8 | -1.1 |
| PYRIDOSTIGMINE BROMIDE      | 37.4 | 23.3  | 12.2 | -5.3 | 34.0 | 15.2  | -5.0  | -2.0 |
| BENZOYLPAS                  | 58.5 | 36.8  | 1.0  | -4.6 | 40.4 | 13.6  | -15.0 | -1.9 |
| MIDODRINE HYDROCHLORIDE     | 55.6 | 34.9  | 6.7  | -7.6 | 39.0 | 17.7  | 2.6   | -4.7 |
| LEVOCARNITINE               | 30.3 | -22.1 | 19.7 | -4.6 | 40.0 | 6.4   | 13.4  | -3.2 |
| MITOXANTHRONE HYDROCHLORIDE | 28.3 | 34.4  | 30.5 | -2.4 | 43.8 | 17.6  | 11.7  | -2.3 |
| TAURINE                     | 22.1 | 0.2   | 15.5 | -2.6 | 29.6 | -3.4  | -19.0 | 1.3  |
| PIPOBROMAN                  | 47.7 | 23.1  | 18.8 | -6.0 | 39.0 | 17.3  | -15.8 | -0.4 |
| DOXORUBICIN                 | 59.6 | 23.2  | 16.9 | -2.8 | 39.0 | 6.8   | -14.8 | 1.0  |
| ACYCLOVIR                   | 33.4 | 3.4   | 23.3 | -5.2 | 41.2 | 21.9  | -19.1 | -0.6 |
| TERAZOSIN HYDROCHLORIDE     | -2.0 | -27.0 | 30.1 | -0.8 | 21.0 | -14.3 | 5.1   | 11.8 |
| CLOPIDOGREL SULFATE         | 37.9 | 23.8  | 3.4  | -5.0 | 14.1 | -5.6  | -9.0  | 1.8  |
| ARSANILIC ACID              | 53.5 | 26.8  | 11.6 | -4.8 | 45.0 | 17.6  | -19.0 | -3.2 |
| BUTACAINE                   | 67.7 | 60.4  | -8.8 | -5.1 | 54.5 | 33.3  | -16.8 | -1.0 |
| ROLITETRACYCLINE            | 44.5 | 25.7  | 15.8 | -6.3 | 39.8 | 9.8   | -0.3  | -3.4 |
| BROMPHENIRAMINE MALEATE     | 55.1 | 42.8  | 13.5 | -3.2 | 41.7 | 18.3  | -11.6 | -1.5 |
| VECURONIUM BROMIDE          | 57.3 | 34.8  | 5.3  | -4.8 | 44.8 | 20.1  | -8.4  | -3.5 |
| FAMPRIDINE                  | 51.7 | 32.0  | 10.0 | -7.1 | 45.0 | 23.5  | -7.3  | -3.0 |
| FEXOFENADINE HYDROCHLORIDE  | 33.0 | 8.0   | 20.1 | -3.0 | 31.4 | 2.3   | 14.4  | 3.9  |
| BRETYLIUM TOSYLATE          | 19.5 | 8.4   | 24.4 | -4.5 | 30.2 | 9.8   | 16.1  | -0.6 |
| OXCARBAZEPINE               | 19.0 | -11.5 | 12.8 | -1.1 | 35.0 | 14.5  | -8.5  | 1.5  |
| ZIDOVUDINE [AZT]            | 41.3 | 15.9  | 16.7 | -2.6 | 37.0 | 21.7  | -9.1  | 0.2  |
| PIOGLITAZONE HYDROCHLORIDE  | 55.6 | 16.6  | 18.1 | -2.0 | 37.8 | 18.0  | -28.9 | -2.2 |

|                             |      |       |       |      |      |       |       |      |
|-----------------------------|------|-------|-------|------|------|-------|-------|------|
| MENADIONE                   | 28.4 | 0.8   | 22.2  | -2.2 | 32.5 | 15.2  | -5.6  | 22.6 |
| ALCLOMETAZONE DIPROPIONATE  | 29.5 | -11.7 | 30.4  | 0.0  | 5.2  | -5.5  | -5.5  | 3.5  |
| NICOTINYL ALCOHOL TARTRATE  | -3.7 | 15.2  | 22.5  | -2.7 | -5.2 | -6.9  | -2.1  | 9.6  |
| CEFTIBUTEN                  | 98.0 | 98.7  | 100.0 | 93.1 | 68.3 | 48.4  | 11.6  | -4.8 |
| BACAMPICILLIN HYDROCHLORIDE | 98.2 | 99.2  | 99.9  | 98.0 | 93.2 | 73.8  | -4.0  | -3.8 |
| APRAMYCIN                   | 33.6 | 15.0  | 18.2  | -3.5 | 41.5 | 10.7  | 1.1   | -1.1 |
| THONZYLAMINE HYDROCHLORIDE  | 41.1 | 28.8  | 12.3  | -3.9 | 55.6 | 35.1  | 3.2   | -4.7 |
| TYLOSIN TARTRATE            | 96.7 | 98.7  | 98.8  | 95.6 | 83.5 | 76.2  | -10.7 | -4.1 |
| ENOXACIN                    | 95.6 | 96.9  | 78.9  | 48.2 | 63.9 | 47.9  | -13.5 | -2.8 |
| DECOQUINATE                 | 22.4 | -2.5  | 20.6  | -3.7 | 49.8 | 14.8  | 11.1  | 0.7  |
| ISOXICAM                    | 31.0 | 8.2   | 29.2  | -4.0 | 32.6 | 11.4  | 0.1   | 0.1  |
| BROMINDIONE                 | 46.3 | 19.8  | 11.1  | -2.4 | 39.4 | 15.4  | -9.3  | 0.1  |
| NADOLOL                     | 28.1 | 14.4  | 3.8   | -2.6 | 33.8 | 16.8  | -4.0  | 1.1  |
| LOBENDAZOLE                 | 38.5 | 1.3   | 18.5  | -2.7 | 39.2 | 13.9  | 2.7   | -2.3 |
| OXETHAZAINE                 | 37.6 | -1.0  | 28.3  | -2.5 | 39.4 | 19.0  | -11.2 | 0.4  |
| THIAMINE                    | 30.1 | -22.9 | 20.7  | -1.7 | 18.6 | -16.3 | -1.1  | 17.7 |
| ETANIDAZOLE                 | 8.3  | 7.2   | 3.2   | -4.0 | 9.3  | -15.6 | 11.2  | 9.4  |
| METHYSERGIDE MALEATE        | 66.6 | 21.0  | 9.5   | -5.5 | 62.9 | 34.5  | -24.2 | -4.2 |
| RETINYL PALMITATE           | 97.9 | 100.2 | 99.7  | 95.1 | 52.5 | 37.5  | -11.7 | -1.6 |
| TIOCONAZOLE                 | 98.9 | 94.7  | 95.4  | 76.6 | 66.9 | 11.4  | -37.9 | -2.8 |
| LORATADINE                  | 53.6 | 34.4  | 2.8   | -4.2 | 35.7 | 2.9   | 2.4   | -2.3 |
| PANTHENOL                   | 43.6 | 0.1   | 5.6   | -4.4 | 59.2 | 27.3  | -2.3  | 1.7  |
| CLOBETASOL PROPIONATE       | 29.5 | 8.6   | 7.0   | -3.6 | 45.4 | 19.3  | -0.8  | -1.7 |
| PIPAMPERONE                 | 17.9 | 5.9   | 22.3  | -2.6 | 35.7 | 9.9   | 13.1  | 6.0  |
| SIROLIMUS                   | 37.5 | 22.1  | 27.6  | -2.4 | 28.7 | 6.2   | 15.9  | 28.8 |
| ALISKIREN HEMIFUMARATE      | 45.4 | 10.1  | 17.4  | -1.9 | 38.4 | 11.0  | 4.0   | 14.8 |
| NICERGOLINE                 | 26.3 | 7.9   | 7.7   | -3.8 | 42.8 | 20.3  | -8.6  | 7.9  |
| TRIFLURIDINE                | 86.8 | 47.1  | 27.8  | -1.7 | 39.6 | -1.9  | 17.9  | 10.4 |
| FOSCARNET SODIUM            | 40.9 | 7.1   | 23.0  | -1.8 | 28.2 | 10.8  | 17.3  | 8.9  |
| MELOXICAM SODIUM            | 37.3 | -18.7 | 15.6  | -3.1 | 16.3 | -12.0 | 16.5  | 31.5 |
| AZACITIDINE                 | 30.5 | 10.7  | 6.0   | -5.3 | -3.1 | -4.7  | -6.6  | -0.4 |
| DONEPEZIL HYDROCHLORIDE     | 33.6 | -14.1 | 9.6   | -5.4 | 46.1 | 15.3  | -16.3 | -2.4 |
| SALICIN                     | 40.8 | 23.6  | 13.7  | -3.7 | 64.0 | 33.4  | -15.1 | -4.1 |
| ALENDRONATE SODIUM          | 85.3 | 59.6  | 21.8  | -5.1 | 51.1 | 29.7  | -4.9  | -1.0 |
| FLOXURIDINE                 | 99.7 | 99.0  | 99.6  | 85.8 | 86.3 | 65.3  | 0.5   | -2.8 |
| CEFDINIR                    | 99.1 | 99.0  | 100.9 | 97.6 | 93.0 | 74.2  | 33.8  | 4.4  |
| BENDROFLUMETHIAZIDE         | 57.9 | 22.0  | 7.2   | -6.5 | 55.8 | 26.6  | -5.7  | -2.8 |
| SERTRALINE HYDROCHLORIDE    | 30.4 | 11.3  | 30.1  | -4.4 | 22.6 | 15.9  | 17.7  | 0.2  |
| THIAMPHENICOL               | 52.3 | 41.5  | 25.3  | -3.7 | 38.9 | 12.4  | 3.4   | -0.2 |
| SARAFLOXACIN HYDROCHLORIDE  | 99.7 | 97.2  | 92.7  | 83.8 | 85.2 | 69.8  | 25.9  | 0.2  |

|                            |       |       |       |      |      |       |       |      |
|----------------------------|-------|-------|-------|------|------|-------|-------|------|
| ETHISTERONE                | 23.0  | -10.5 | 9.1   | -0.4 | 35.4 | 2.9   | -7.8  | 1.1  |
| CEFDITORIN PIVOXIL         | 97.2  | 79.5  | 90.7  | 76.1 | 77.2 | 48.0  | 47.1  | 11.9 |
| LABETALOL HYDROCHLORIDE    | 27.1  | -9.0  | 26.8  | -2.0 | 36.7 | 20.5  | -7.9  | 0.8  |
| CAPOBENIC ACID             | 34.7  | -16.8 | 24.0  | 0.9  | 9.9  | -12.4 | 10.6  | 5.7  |
| NALTREXONE HYDROCHLORIDE   | 5.9   | 6.2   | 13.8  | -3.1 | 5.5  | -6.0  | -2.9  | 0.3  |
| METHYLENE BLUE             | 43.4  | 35.9  | 14.4  | -8.4 | 56.3 | 16.2  | -25.6 | -6.1 |
| DIPYRONE                   | 66.2  | 64.0  | 8.4   | -2.9 | 73.4 | 53.1  | -18.2 | -3.3 |
| TRICLOSAN                  | 100.4 | 98.7  | 100.9 | 93.9 | 76.4 | 43.5  | 40.1  | 4.3  |
| NAFRONYL OXALATE           | 50.2  | 38.8  | 9.9   | -3.7 | 58.1 | 29.6  | -6.0  | -2.1 |
| SOLIFENACIN SUCCINATE      | 67.4  | 28.1  | 20.7  | -5.9 | 33.9 | 6.4   | -15.9 | 9.5  |
| THALIDOMIDE                | 43.5  | 20.9  | 12.8  | -4.8 | 49.1 | 24.4  | -19.2 | -2.5 |
| ERGOTAMINE TARTRATE        | 25.1  | 9.6   | 20.3  | -2.2 | 28.8 | 8.1   | 10.5  | 1.2  |
| SELAMECTIN                 | 40.1  | 18.6  | 25.0  | -4.6 | 35.4 | 11.5  | -1.5  | -0.5 |
| PHENTERMINE                | 49.1  | -14.6 | 14.5  | -4.3 | 34.7 | 14.5  | 0.0   | 8.7  |
| IOPANIC ACID               | 42.8  | 40.4  | -21.0 | -1.5 | 31.8 | 4.7   | -49.1 | 1.5  |
| PANCURONIUM BROMIDE        | 43.5  | -31.3 | 20.0  | -2.5 | 32.5 | 9.0   | 1.0   | 7.9  |
| PAROXETINE HYDROCHLORIDE   | 43.9  | 11.1  | 24.5  | -2.2 | 30.8 | 8.6   | -9.5  | 7.1  |
| ACAMPROSATE CALCIUM        | 31.4  | -19.5 | 20.5  | -2.3 | 16.2 | 1.8   | 2.9   | 18.9 |
| SPIPERONE                  | 27.5  | 13.9  | 5.4   | -4.5 | 5.3  | -8.4  | 1.2   | 11.2 |
| PIRENPERONE                | 51.4  | 40.9  | 10.3  | -2.3 | 43.7 | 19.7  | -17.2 | -1.7 |
| CEFSULODIN SODIUM          | 42.3  | 35.6  | 10.7  | -4.5 | 76.5 | 60.8  | -13.2 | -4.3 |
| CARVEDILOL                 | 36.7  | 14.5  | 12.9  | -4.1 | 38.2 | 8.1   | -11.1 | -2.9 |
| CYCLOHEXIMIDE              | 49.7  | 40.3  | 7.9   | -3.4 | 44.4 | 23.5  | -4.0  | -2.7 |
| FLUVASTATIN                | 54.3  | 29.2  | 15.8  | -3.9 | 47.6 | 12.8  | -3.9  | -0.8 |
| MONENSIN SODIUM            | 61.2  | 52.2  | 19.8  | -3.9 | 69.5 | 47.6  | 2.2   | -1.1 |
| ACARBOSE                   | 29.2  | 8.9   | 27.4  | -4.0 | 28.6 | 10.0  | 21.2  | 3.3  |
| ALTRETAMINE                | 25.3  | 15.6  | 22.1  | -1.4 | 30.5 | 11.4  | 18.9  | 1.7  |
| SIBUTRAMINE HYDROCHLORIDE  | 19.8  | 5.6   | 18.2  | -2.8 | 37.4 | 18.0  | -8.6  | 2.5  |
| BEPRIDIL HYDROCHLORIDE     | 23.6  | 10.2  | 26.9  | -1.6 | 34.3 | 25.4  | -3.9  | 1.1  |
| ALFLUZOSIN                 | 43.9  | 9.5   | 23.1  | -2.7 | 34.3 | 17.3  | 13.4  | 0.3  |
| TENOXICAM                  | 26.5  | 8.0   | 22.6  | -4.0 | 38.6 | 20.5  | -19.5 | 2.4  |
| CLOPIDOL                   | 3.2   | -18.1 | 20.0  | -1.1 | -8.2 | -6.3  | 3.1   | 1.7  |
| PARAROSANILINE PAMOATE     | -9.8  | -9.4  | 8.4   | -1.8 | 10.3 | -3.6  | -7.8  | 2.5  |
| VALACYCLOVIR HYDROCHLORIDE | 46.1  | 32.2  | 1.3   | -3.3 | 50.7 | 19.7  | -12.9 | -1.8 |
| LEVAMISOLE HYDROCHLORIDE   | 43.4  | 52.5  | 16.7  | -5.7 | 66.8 | 60.5  | -10.4 | -4.1 |
| ACETOHEXAMIDE              | 58.4  | 47.0  | 8.3   | -2.8 | 57.0 | 28.6  | -17.7 | -1.2 |
| CYCLOTHIAZIDE              | 53.6  | 50.1  | 16.2  | -4.1 | 47.7 | 31.2  | -8.5  | -0.6 |
| METHYLATROPINE NITRATE     | 50.4  | 34.6  | 6.7   | -5.7 | 52.1 | 25.0  | -12.3 | -2.3 |
| SULFANILATE ZINC           | 28.8  | 20.7  | 15.4  | -3.5 | 51.2 | 31.3  | -15.7 | -2.6 |
| TRIMETHADIONE              | 47.3  | 10.7  | 20.5  | -1.9 | 26.5 | 11.2  | 10.9  | 0.5  |

|                                   |       |       |       |      |       |       |       |      |
|-----------------------------------|-------|-------|-------|------|-------|-------|-------|------|
| QUIPAZINE MALEATE                 | 42.7  | 27.6  | 23.7  | -4.1 | 36.3  | 14.0  | 10.9  | -0.7 |
| ACEPROMAZINE MALEATE              | 21.4  | 2.5   | 14.2  | -1.7 | 37.3  | 15.4  | -7.7  | 7.9  |
| NITRENDIPINE                      | 2.2   | 8.5   | 22.8  | 6.5  | 29.9  | 19.6  | -10.1 | 0.2  |
| ANAGRELIDE HYDROCHLORIDE          | 62.0  | 36.4  | 12.4  | -2.6 | 29.2  | 19.5  | -3.4  | 1.3  |
| NAPROXOL                          | 49.8  | 28.1  | 21.6  | -3.6 | 35.0  | 13.8  | -16.6 | 8.8  |
| TRIENTINE HYDROCHLORIDE           | 49.8  | -2.0  | 11.7  | -2.1 | 7.1   | -13.8 | -0.4  | 27.1 |
| KETOROLAC TROMETHAMINE            | 89.7  | 100.1 | 90.3  | 76.3 | -19.1 | 25.4  | 20.3  | -1.1 |
| FUMAZENIL                         | 49.0  | 37.0  | 16.0  | -6.4 | 66.3  | 40.2  | -13.8 | -4.4 |
| ETHYLNOREPINEPHRINE HYDROCHLORIDE | 42.2  | 44.3  | 14.2  | -4.4 | 62.2  | 46.4  | -30.5 | -2.1 |
| PREDNISOLONE SODIUM PHOSPHATE     | 66.4  | 48.8  | -5.1  | -4.4 | 38.5  | 10.5  | -14.6 | -1.6 |
| ERYTHROMYCIN ESTOLATE             | 76.7  | 69.4  | 18.6  | -7.0 | 34.3  | 31.8  | -11.9 | -0.2 |
| AVOBENZONE                        | 72.7  | 52.5  | 5.5   | -4.0 | 58.7  | 30.9  | 6.4   | -1.1 |
| FOSFOMYCIN CALCIUM                | 47.1  | 33.6  | 8.7   | -3.0 | 48.0  | 32.9  | -8.6  | -1.4 |
| IRBESARTAN                        | 27.1  | 12.6  | 22.7  | -3.2 | 36.0  | 8.0   | 6.5   | -1.6 |
| TINIDAZOLE                        | 51.5  | 28.5  | 21.4  | -1.7 | 36.0  | 13.8  | -0.3  | 2.5  |
| PIZOTYLIN MALATE                  | 26.0  | 10.2  | 29.6  | -3.0 | 43.5  | 16.2  | -9.3  | -0.2 |
| ABAMECTIN                         | 22.9  | 20.3  | 9.0   | -1.8 | 21.9  | 17.6  | -13.0 | 0.9  |
| ROPINIROLE                        | 39.7  | 5.9   | 25.0  | -1.8 | 33.7  | 19.0  | -3.7  | -0.6 |
| AMINOHIPURIC ACID                 | 54.7  | 36.0  | 11.8  | -3.0 | 31.0  | 17.2  | -8.8  | 1.8  |
| PERINDOPRIL ERBUMINE              | 19.0  | -14.3 | 28.0  | 4.1  | 10.7  | -16.3 | -3.0  | 5.4  |
| BROMHEXINE HYDROCHLORIDE          | 42.0  | 28.1  | 5.1   | -2.9 | 4.8   | -7.8  | -14.0 | 17.0 |
| TELITHROMYCIN                     | 98.6  | 99.0  | 100.2 | 88.0 | 94.5  | 83.5  | 1.2   | -2.0 |
| CHLOROXINE                        | 79.5  | 46.1  | 28.9  | -1.9 | 60.1  | 43.9  | -9.9  | -2.4 |
| CHLORMADINONE ACETATE             | 50.7  | 34.6  | 10.1  | -4.5 | 38.2  | 10.9  | -8.4  | -3.1 |
| PERHEXILINE MALEATE               | 100.0 | 98.4  | 86.0  | 30.8 | 33.8  | 25.4  | -12.0 | 0.5  |
| DULOXETINE HYDROCHLORIDE          | 50.2  | 40.0  | 3.9   | -4.1 | 41.2  | 17.0  | -5.7  | 0.0  |
| MEPHENTERMINE SULFATE             | 42.6  | 29.0  | 21.5  | 1.6  | 38.7  | 24.4  | -5.8  | -1.6 |
| ETHOXZOLAMIDE                     | 40.8  | 28.6  | 16.8  | -1.5 | 32.3  | 9.4   | 7.0   | 0.8  |
| NICLOSAMIDE                       | 100.1 | 96.2  | 86.7  | 81.4 | 82.4  | 47.2  | 61.3  | 9.1  |
| NITHIAMIDE                        | 71.2  | 32.2  | 18.1  | -1.9 | 33.7  | 11.8  | -3.5  | 1.7  |
| URETHANE                          | 31.2  | 12.7  | 22.9  | -2.0 | 31.7  | 20.6  | 9.5   | 5.5  |
| ZINC UNDECYLENATE                 | 49.2  | 24.8  | 18.1  | -2.9 | 35.1  | 15.4  | -10.3 | 1.5  |
| RITANSERIN                        | 29.0  | 8.9   | 29.0  | 1.0  | 25.2  | 11.7  | 7.5   | 2.4  |
| BIPERIDEN                         | 33.6  | 7.1   | 17.5  | -4.2 | -23.8 | -7.3  | -1.5  | 1.3  |
| BENZALKONIUM CHLORIDE             | 98.5  | 99.0  | 66.1  | 59.9 | 4.6   | -37.7 | 15.6  | 2.4  |
| ETOMIDATE                         | 59.7  | 31.7  | 3.5   | -4.4 | 56.6  | 23.9  | -34.4 | -1.9 |
| COLFORSIN                         | 63.8  | 59.3  | 15.8  | -0.3 | 33.8  | 26.2  | -26.5 | 2.4  |
| TICLOPIDINE HYDROCHLORIDE         | 67.6  | 32.4  | -4.2  | -4.0 | 46.3  | 11.3  | -8.3  | -1.2 |
| LANSOPRAZOLE                      | 46.8  | 40.4  | 9.0   | -4.1 | 27.2  | 22.0  | 0.7   | 8.0  |
| ALTRENOGEST                       | 34.2  | 19.7  | 9.0   | -2.2 | 47.2  | 12.4  | -12.4 | 0.4  |

|                                 |       |       |       |       |       |       |       |      |
|---------------------------------|-------|-------|-------|-------|-------|-------|-------|------|
| ALAPROCLATE                     | 32.6  | 19.3  | 10.4  | -5.9  | 32.2  | 21.2  | -17.6 | 6.4  |
| PREGNENOLONE SUCCINATE          | 55.9  | 23.7  | 30.1  | -3.4  | 27.7  | -9.5  | 5.9   | 4.7  |
| ESTRADIOL PROPIONATE            | 6.2   | -8.3  | 18.4  | -0.1  | 22.0  | 0.5   | 0.7   | 4.0  |
| ATOVAQUONE                      | 40.7  | -0.2  | 5.5   | -3.7  | 41.3  | 11.4  | 2.0   | 0.2  |
| CEFAMANDOLE NAFATE              | 27.6  | 11.5  | 19.8  | -0.4  | 32.7  | 25.6  | -23.1 | 0.5  |
| LEVOFLOXACIN                    | 99.0  | 95.8  | 97.3  | 89.3  | 80.3  | 58.7  | 33.4  | -1.2 |
| CARBIDOPA                       | 42.9  | -7.0  | 26.0  | -3.9  | 35.3  | 9.4   | -29.6 | 1.0  |
| EXEMESTANE                      | 22.8  | -23.2 | 17.3  | -1.0  | -19.7 | -7.7  | 1.2   | 22.1 |
| BENZOIC ACID                    | 17.3  | 10.8  | 9.5   | -1.8  | 1.4   | -9.2  | -11.2 | 4.0  |
| QUETIAPINE                      | 11.1  | 2.5   | 21.4  | -2.7  | 36.7  | 20.3  | -35.6 | -2.4 |
| MEFLOQUINE                      | 51.9  | 48.1  | 15.8  | -3.2  | 60.4  | 51.7  | -29.4 | -1.7 |
| ROSUVASTATIN CALCIUM            | 24.7  | 8.8   | 22.7  | -3.9  | 29.7  | 6.8   | -2.4  | -1.9 |
| CARMUSTINE                      | 40.9  | 38.7  | 11.8  | -2.9  | 36.6  | 28.7  | 0.0   | -1.6 |
| OXAPROZIN                       | 29.3  | 14.4  | 23.0  | 3.7   | 34.7  | 10.7  | -4.6  | 0.0  |
| CHLORPROTHIXENE HYDROCHLORIDE   | 54.9  | 36.6  | 8.2   | -3.3  | 46.3  | 31.5  | -15.0 | -2.0 |
| OXICONAZOLE NITRATE             | 98.7  | 92.9  | 76.5  | 82.9  | 41.0  | -28.6 | -8.7  | 0.3  |
| PAROMOMYCIN SULFATE             | 12.5  | -21.9 | 30.3  | 4.7   | 23.3  | 7.0   | 0.8   | 1.1  |
| NISOLDIPINE                     | 9.8   | -12.4 | 26.4  | 4.4   | 37.5  | 15.3  | -24.3 | -2.6 |
| METARAMINOL BITARTRATE          | 20.6  | 13.6  | 32.1  | 5.8   | 26.7  | 20.6  | -11.5 | -2.0 |
| FLUCYTOSINE                     | 26.8  | -19.3 | 21.1  | 3.4   | 38.0  | 21.5  | -10.7 | -2.1 |
| NOMIFENSINE MALEATE             | 15.0  | -4.8  | 24.3  | 7.8   | 14.4  | 19.6  | 11.9  | -1.3 |
| PRALIDOXIME CHLORIDE            | 17.8  | -16.3 | 23.7  | 5.7   | -8.5  | -12.3 | -6.1  | 2.7  |
| THIRAM                          | -31.6 | 5.2   | 28.2  | 4.9   | -12.1 | 4.3   | -11.4 | 1.4  |
| UNDECYLENIC ACID                | 8.8   | 2.1   | 20.6  | 22.6  | 22.5  | 43.6  | -48.1 | -2.3 |
| SEMUSTINE                       | 28.6  | 32.4  | 16.2  | -1.8  | 32.3  | 34.1  | -35.9 | -0.1 |
| DEXCHLORPHENIRAMINE MALEATE     | 11.4  | 20.0  | 16.6  | -1.7  | 34.6  | 7.3   | -1.3  | -2.2 |
| CIPROFLOXACIN                   | 99.9  | 99.1  | 97.2  | 92.6  | 83.2  | 66.1  | 10.4  | -1.5 |
| LAMOTRIGINE                     | 33.9  | 17.5  | 17.6  | -3.3  | 39.4  | 14.8  | -5.9  | -1.1 |
| ISOSORBIDE MONONITRATE          | 11.5  | 14.2  | -1.9  | 0.8   | 36.7  | 13.8  | -53.3 | 1.1  |
| TICARCILLIN DISODIUM            | 102.8 | 99.9  | 101.3 | 100.3 | 91.4  | 57.5  | 20.6  | 9.8  |
| MEXILETINE HYDROCHLORIDE        | 56.9  | 21.8  | 9.2   | -1.0  | 59.8  | 25.4  | -40.5 | -2.4 |
| BISOPROLOL FUMARATE             | 10.9  | -15.6 | 5.5   | 7.7   | 41.8  | -15.5 | -33.4 | 8.9  |
| ACETRIAZOIC ACID                | 50.5  | 20.5  | 5.2   | 0.2   | 41.5  | 14.4  | -26.3 | -1.8 |
| DARIFENACIN HYDROBROMIDE        | 9.6   | -9.6  | 11.5  | 2.3   | 41.1  | -15.7 | -22.9 | 6.5  |
| ESTRADIOL BENZOATE              | 18.2  | 7.1   | -0.1  | 6.5   | 29.3  | 2.8   | -21.1 | 1.6  |
| TRIMETOZINE                     | 5.0   | -23.0 | 20.1  | 22.7  | 38.3  | -26.0 | -12.2 | 1.8  |
| LIOTHYRONINE (L- isomer) SODIUM | 25.1  | 40.8  | -37.9 | -0.7  | 11.8  | 6.7   | -62.2 | -2.3 |
| LITHIUM CITRATE                 | 22.7  | -24.2 | 18.2  | 19.9  | 15.2  | -27.0 | -87.6 | 3.8  |
| ETHOSUXIMIDE                    | 1.0   | -8.8  | 12.1  | 6.7   | 24.9  | -23.2 | -32.0 | -2.3 |
| TILMICOSIN                      | 103.5 | 98.8  | 101.4 | 100.5 | 30.6  | 3.1   | 7.7   | -4.4 |

|                                        |       |       |      |      |      |       |       |      |
|----------------------------------------|-------|-------|------|------|------|-------|-------|------|
| BENZYL BENZOATE                        | 8.2   | -13.1 | -1.6 | 9.5  | 26.4 | -13.1 | -18.7 | -3.2 |
| RIZATRIPTAN BENZOATE                   | 41.9  | -23.7 | 15.2 | 34.6 | -7.3 | -45.9 | -39.7 | -0.1 |
| ADIPHENINE HYDROCHLORIDE               | -27.4 | 12.6  | 12.1 | 4.2  | 4.1  | 5.7   | -38.2 | -1.6 |
| RAMIPRIL                               | 52.4  | 16.6  | 5.0  | 3.8  | 44.7 | -1.1  | -33.1 | -0.6 |
| CEFTRIAZONE SODIUM TRIHYDRATE          | 72.4  | 56.3  | 8.8  | -0.1 | 65.4 | 38.7  | -44.3 | -2.3 |
| OXFENDAZOLE                            | 47.7  | 31.8  | 22.5 | 0.4  | 38.2 | 4.8   | 3.7   | 2.1  |
| CINNARAZINE                            | 54.8  | 31.3  | 3.4  | 2.0  | 44.1 | 15.2  | -7.1  | -0.6 |
| AZAPERONE                              | 6.6   | 0.5   | 17.6 | 0.2  | 50.0 | 11.9  | -25.2 | -2.6 |
| METHAPYRILENE HYDROCHLORIDE            | 39.6  | 19.4  | 7.3  | 3.8  | 68.1 | 34.9  | -36.7 | -2.4 |
| MONTELUKAST SODIUM                     | -44.7 | 4.1   | 4.9  | 1.2  | 27.7 | -14.8 | -9.1  | 0.1  |
| METHAZOLAMIDE                          | 25.6  | 16.8  | 11.7 | 0.3  | 57.4 | 23.2  | -20.6 | -1.0 |
| FOMEPIZOLE HYDROCHLORIDE               | 24.2  | 2.9   | 10.5 | 0.0  | 41.8 | -3.3  | -16.8 | -0.9 |
| PERGOLIDE MESYLATE                     | 40.6  | 20.8  | 13.0 | 12.3 | 38.9 | 1.9   | -27.7 | -1.1 |
| PREDNISOLONE HEMISUCCINATE             | 7.3   | -24.5 | 19.7 | 0.3  | 26.0 | -8.3  | -6.4  | -1.5 |
| THIOTEPA                               | 39.9  | -2.3  | 20.8 | 1.4  | 20.4 | -3.1  | -24.5 | 0.5  |
| CLINDAMYCIN PALMITATE<br>HYDROCHLORIDE | -33.2 | -29.1 | 13.7 | 4.0  | 7.2  | -28.0 | 4.9   | -1.0 |
| SPIRAMYCIN                             | 63.7  | 57.8  | 28.1 | -0.7 | 29.0 | 19.2  | -22.3 | -1.2 |
| DILOXANIDE FUROATE                     | 39.6  | 24.7  | 5.4  | -0.7 | 73.3 | 40.8  | -49.4 | 0.1  |
| CELECOXIB                              | 33.5  | 44.1  | 2.7  | 0.4  | 59.0 | 28.9  | -41.9 | -1.3 |
| RALOXIFENE HYDROCHLORIDE               | 47.4  | 30.6  | 37.0 | -0.2 | 61.4 | 30.5  | -28.8 | 0.5  |
| AMCINONIDE                             | 40.9  | 23.5  | 23.0 | 1.1  | 40.4 | 14.5  | -26.6 | 1.1  |
| TETRAMIZOLE HYDROCHLORIDE              | 45.0  | 19.4  | 6.4  | -1.2 | 69.8 | 36.2  | -39.8 | 0.4  |
| MORANTEL CITRATE                       | 23.7  | 30.9  | 7.2  | 0.2  | 61.3 | 34.0  | -14.0 | 1.9  |
| FLUDARABINE PHOSPHATE                  | 41.8  | 17.6  | 15.8 | -0.5 | 64.5 | 17.1  | -17.5 | -1.7 |
| VENLAFAXINE                            | 23.6  | 25.5  | 11.6 | 0.3  | 50.9 | 21.6  | -14.7 | 0.7  |
| DESOXYMETASONE                         | 29.9  | 7.6   | 1.7  | -0.4 | 51.6 | 10.4  | -32.3 | -1.6 |
| RETINOL                                | 35.2  | 29.2  | 10.9 | 0.6  | 33.4 | 5.1   | -41.6 | -0.3 |
| ZOXAZOLAMINE                           | -15.0 | 2.9   | -3.4 | -2.1 | 45.6 | 8.6   | -61.6 | -1.3 |
| ALRESTATIN                             | -14.2 | -10.1 | 21.2 | 4.5  | 19.7 | -3.8  | -22.6 | 1.7  |
| GATIFLOXACIN                           | 94.9  | 95.3  | 92.8 | 98.6 | 70.1 | 3.3   | 41.5  | -0.7 |
| PIPERIDOLATE HYDROCHLORIDE             | 43.2  | 26.5  | 1.5  | 22.7 | 7.4  | -0.8  | -10.5 | -1.1 |
| FLUNIXIN MEGLUMINE                     | 73.9  | 60.8  | 1.5  | 0.8  | 58.4 | 22.7  | -42.0 | -2.6 |
| BENZOYL PEROXIDE                       | 76.5  | 63.5  | -2.6 | -1.0 | 48.3 | 23.8  | -27.3 | -2.8 |
| FAMCICLOVIR                            | 60.2  | 39.2  | 17.7 | -1.1 | 47.0 | 10.6  | -12.4 | -2.2 |
| QUINAPRIL HYDROCHLORIDE                | 71.2  | 54.8  | 5.2  | -2.2 | 30.6 | 5.7   | 6.8   | -1.9 |
| ESCITALOPRAM OXALATE                   | 76.0  | 48.2  | 3.3  | -0.9 | 62.4 | 21.1  | -10.0 | -3.3 |
| TRIMIPRAMINE MALEATE                   | 68.3  | 49.9  | 24.8 | -1.4 | 47.9 | 13.1  | -21.8 | -2.4 |
| AMITRAZ                                | 67.3  | 40.8  | 8.8  | -0.2 | 54.2 | 13.5  | -14.0 | -0.2 |
| DANTROLENE SODIUM                      | 23.6  | 10.3  | 28.0 | 1.4  | 57.3 | 24.0  | -18.9 | -1.9 |

|                                        |       |       |       |      |      |       |       |      |
|----------------------------------------|-------|-------|-------|------|------|-------|-------|------|
| TRANILAST                              | 71.2  | 45.6  | 13.6  | 2.5  | 50.8 | 7.2   | -27.5 | -0.8 |
| BETA-PROPIOLACTONE                     | 47.4  | 26.6  | 7.6   | 0.7  | 44.9 | 5.2   | -22.0 | -2.3 |
| BENURESTAT                             | 51.0  | 15.9  | 32.3  | 0.2  | 50.2 | 4.8   | -8.4  | -1.7 |
| METHYLBENZETHONIUM CHLORIDE            | 100.7 | 97.3  | 99.0  | 90.7 | 37.4 | 0.6   | -45.7 | -1.7 |
| GLIPIZIDE                              | 39.0  | -21.5 | 4.5   | 23.3 | 13.1 | -20.5 | 4.3   | -0.8 |
| PRILOCAINE HYDROCHLORIDE               | 47.7  | 22.1  | 10.1  | 1.9  | 6.4  | -3.0  | -25.6 | -1.5 |
| PYRIDOXINE                             | 74.8  | 56.2  | 5.7   | 8.1  | 62.9 | 30.5  | -48.4 | -3.7 |
| TETROQUINONE                           | 71.6  | 62.4  | 4.8   | -1.0 | 73.5 | 47.9  | -37.8 | -2.9 |
| CEFONICID SODIUM                       | 88.2  | 66.3  | 38.5  | 9.8  | 67.5 | 47.2  | -5.8  | -3.0 |
| CLOFIBRATE                             | 69.0  | 50.1  | 23.0  | -1.8 | 60.6 | 26.2  | -28.4 | -1.0 |
| ETIDRONATE DISODIUM                    | 78.1  | 50.0  | 9.5   | 0.2  | 53.4 | 18.9  | -16.3 | -2.7 |
| AZITHROMYCIN                           | 98.8  | 97.9  | 99.5  | 96.6 | 85.5 | 75.4  | -35.3 | -2.8 |
| CEFPODOXIME PROXETIL                   | 81.9  | 58.4  | 41.5  | 2.9  | 84.9 | 54.8  | 37.8  | -1.5 |
| BUPIVACAINE HYDROCHLORIDE              | 59.9  | 38.1  | 6.1   | -1.6 | 73.2 | 39.3  | -14.4 | -0.1 |
| TOLTRAZURIL                            | 63.1  | 43.6  | 11.2  | 3.0  | 40.6 | 4.0   | -23.6 | -1.1 |
| PERPHENAZINE                           | 68.5  | 55.7  | 21.3  | 0.7  | 47.6 | 9.5   | -19.1 | 0.0  |
| MUPIROCIN                              | 101.8 | 98.1  | 100.5 | 97.1 | 81.2 | 80.6  | 20.4  | -1.6 |
| CITALOPRAM                             | 44.2  | 3.8   | 16.0  | -0.2 | 54.8 | 11.1  | -30.5 | 1.5  |
| BETAMETHASONE ACETATE                  | -5.4  | -1.2  | 17.4  | 16.8 | 13.4 | -29.4 | -6.4  | 1.9  |
| ISOTRETINON                            | 24.4  | 31.1  | 14.3  | -1.1 | 10.0 | -5.9  | -21.9 | -2.5 |
| CYSTEAMINE HYDROCHLORIDE               | 68.1  | 52.8  | 8.8   | -3.7 | 53.9 | 29.2  | -41.6 | -2.8 |
| PROADIFEN HYDROCHLORIDE                | 74.1  | 66.6  | 5.2   | -1.7 | 62.7 | 38.6  | -37.6 | -1.8 |
| MIGLITOL                               | 70.9  | 55.2  | 26.7  | -0.8 | 53.3 | 17.1  | -2.4  | -0.5 |
| ANISINDIONE                            | 75.6  | 62.2  | 20.9  | -1.1 | 46.8 | 21.7  | 0.9   | -0.5 |
| CLORSULON                              | 65.0  | 25.6  | 16.1  | -2.8 | 53.2 | 17.1  | -11.5 | -1.1 |
| BETAINE HYDROCHLORIDE                  | 74.1  | 34.1  | 19.0  | -1.2 | 57.4 | 27.0  | -15.3 | -0.2 |
| AMLODIPINE BESYLATE                    | 19.8  | 17.7  | 32.1  | -2.3 | 62.1 | 18.6  | -3.4  | 0.8  |
| AMIFOSTINE                             | 67.2  | 42.4  | 16.8  | 0.8  | 48.4 | 21.1  | 0.7   | -0.6 |
| DERACOXIB                              | 57.3  | 35.1  | 22.8  | -1.1 | 42.0 | 1.8   | -6.9  | -0.5 |
| TRIFLUPROMAZINE HYDROCHLORIDE          | 73.4  | 50.7  | 9.8   | -0.8 | 44.9 | 15.9  | -7.9  | 0.5  |
| PEFLOXACINE MESYLATE                   | 101.6 | 97.1  | 99.3  | 94.7 | 85.1 | 65.1  | 28.0  | -0.2 |
| BETAMETHASONE 17,21-DIPROPIONATE       | 30.7  | -16.9 | 11.0  | 1.0  | 34.5 | -6.5  | -10.9 | 0.1  |
| AZELASTINE HYDROCHLORIDE               | 47.0  | -14.1 | 24.5  | 14.2 | 24.7 | -29.4 | -14.1 | 10.4 |
| HALCINONIDE                            | 58.1  | 36.8  | 15.2  | -1.7 | 36.1 | 8.9   | -25.4 | -2.9 |
| BENZOXIQUINE                           | -7.5  | 1.9   | 14.3  | -0.6 | -3.4 | 5.8   | -26.2 | -3.7 |
| METHYLPREDNISOLONE SODIUM<br>SUCCINATE | 61.4  | 45.3  | 9.9   | -2.3 | 35.1 | 8.4   | -39.9 | -3.1 |
| GUANFACINE                             | 45.3  | 41.5  | 11.9  | -1.4 | 53.2 | 28.0  | -36.0 | -1.6 |
| HYDROCORTISONE BUTYRATE                | 44.7  | 38.3  | 27.1  | -1.9 | 57.6 | 26.7  | -0.9  | -2.2 |
| RIMANTADINE HYDROCHLORIDE              | 66.2  | 37.2  | 5.4   | -1.6 | 48.3 | 14.7  | -13.5 | -1.4 |

|                                 |       |       |       |      |      |       |        |      |
|---------------------------------|-------|-------|-------|------|------|-------|--------|------|
| SULFANITRAN                     | 75.6  | 49.4  | -0.6  | -1.0 | 50.1 | 21.3  | -23.1  | -2.1 |
| IFOSFAMIDE                      | 32.7  | 10.4  | 12.6  | -1.7 | 47.3 | 5.5   | -4.6   | -0.5 |
| RESORCINOL MONOACETATE          | 67.8  | 47.6  | 14.1  | -1.5 | 53.1 | 23.6  | -5.2   | 0.1  |
| NATAMYCIN                       | 61.7  | 25.7  | 14.6  | -0.4 | 48.6 | 14.1  | -7.1   | -1.2 |
| ANETHOLE                        | 59.7  | 43.3  | 0.0   | 1.5  | 51.7 | 15.9  | -30.5  | 1.3  |
| TADALAFIL                       | 43.3  | -9.9  | 12.6  | 0.2  | 45.6 | 4.9   | -9.0   | -0.9 |
| ALBENDAZOLE                     | 55.0  | 33.0  | 12.0  | 1.4  | 34.2 | 5.6   | -36.8  | -0.2 |
| TOREMIPHENE CITRATE             | 73.2  | 42.5  | 66.4  | 57.3 | 13.8 | -25.8 | -23.0  | 2.6  |
| RIBAVIRIN                       | 14.5  | 13.9  | 11.3  | -1.9 | -1.3 | -7.6  | -23.5  | -1.4 |
| TEICOPLANIN [A(2-1) shown]      | 98.5  | 98.3  | 99.1  | 94.0 | 85.4 | 65.3  | -1.7   | -3.5 |
| FLUOXETINE                      | 70.0  | 42.9  | -0.8  | -0.6 | 59.6 | 30.8  | -35.0  | -3.2 |
| ERYTHROSINE SODIUM              | 53.6  | 45.3  | -47.8 | -1.2 | 61.7 | 35.8  | -64.3  | 0.1  |
| ISOFLUPREDNONE ACETATE          | 59.7  | 46.2  | 24.3  | -1.6 | 51.6 | 23.7  | -14.9  | -1.9 |
| BROXYQUINOLINE                  | 83.8  | 53.4  | 55.3  | 22.1 | 81.5 | 28.7  | -21.2  | -3.1 |
| GLYCOPYRROLATE                  | 75.8  | 54.8  | 6.7   | 1.2  | 55.4 | 19.0  | -20.6  | -3.3 |
| URSOLIC ACID                    | 28.1  | 10.9  | 11.9  | -0.1 | 64.4 | 24.3  | -118.5 | 0.4  |
| METHYLPHENIDATE HYDROCHLORIDE   | 65.2  | 35.8  | 16.2  | -0.7 | 68.5 | 37.7  | -8.9   | -1.0 |
| TELENZEPINE HYDROCHLORIDE       | 44.4  | 19.6  | 20.6  | 0.4  | 60.6 | 18.2  | -30.7  | 1.6  |
| CLOFAZIMINE                     | 64.2  | 40.5  | 3.9   | -0.3 | 38.9 | 3.8   | -20.1  | -1.6 |
| OMEGA-3-ACID ESTERS (EPA shown) | -0.3  | -19.7 | 8.0   | 2.8  | 71.1 | 27.6  | -22.5  | -2.2 |
| DENATONIUM BENZOATE             | 36.5  | 12.4  | 4.3   | 1.0  | 44.5 | 5.6   | -37.5  | 1.6  |
| BENFLUOREX HYDROCHLORIDE        | 55.0  | -6.3  | 24.1  | 0.3  | 17.1 | -25.7 | -16.0  | -0.1 |
| ALPRENOLOL                      | 17.7  | 9.5   | 19.3  | -1.2 | -8.8 | -12.5 | -17.8  | -0.2 |
| LUFENURON                       | 56.3  | 18.7  | 6.2   | -2.4 | 43.7 | 15.7  | -53.7  | -3.0 |
| PENTYLENETETRAZOL               | 74.0  | 58.4  | 17.3  | -1.4 | 62.6 | 38.5  | -36.3  | -2.6 |
| CLOFOCTOL                       | 80.1  | 58.4  | 28.5  | -2.1 | 67.0 | 38.7  | 1.9    | 0.0  |
| DEXPANTHENOL                    | 68.7  | 56.4  | 28.9  | -3.7 | 63.1 | 39.4  | -2.5   | -1.4 |
| CHLORALOSE                      | 68.2  | 27.9  | 9.8   | -1.8 | 65.2 | 32.4  | -12.1  | -0.3 |
| CLEMIZOLE HYDROCHLORIDE         | 75.5  | 54.7  | 22.9  | -1.8 | 65.3 | 35.0  | -23.7  | -4.2 |
| CHINIOFON                       | 54.1  | 35.8  | 17.9  | -1.1 | 56.5 | 12.8  | 1.0    | -3.3 |
| CLOFIBRIC ACID                  | 43.9  | 23.7  | 19.0  | -2.8 | 70.9 | 38.0  | -8.4   | -2.5 |
| CLENBUTEROL HYDROCHLORIDE       | 66.1  | 34.4  | 21.4  | 2.3  | 60.5 | 10.0  | -29.3  | -1.0 |
| ERYTHROMYCIN STEARATE           | 102.4 | 97.6  | 96.9  | 93.4 | 97.1 | 82.4  | -15.6  | -0.5 |
| PRASTERONE ACETATE              | 41.9  | 0.3   | 14.8  | 2.6  | 37.6 | -2.4  | -20.4  | -1.3 |
| AMBROXOL HYDROCHLORIDE          | -44.8 | 6.3   | 12.7  | 3.2  | 56.2 | 25.2  | -18.1  | 0.0  |
| QUININE ETHYL CARBONATE         | 56.2  | 1.3   | 18.3  | -0.8 | 7.0  | -21.9 | 6.2    | 2.1  |
| OLEANOLIC ACID ACETATE          | 1.6   | 13.5  | 9.4   | 0.8  | 6.5  | 15.0  | -52.3  | -3.8 |
| PIROMIDIC ACID                  | 79.0  | 57.8  | 6.3   | -3.0 | 54.9 | 26.5  | -23.3  | -1.0 |
| NIPECOTIC ACID                  | 61.6  | 51.9  | 14.9  | -1.6 | 54.0 | 30.6  | -20.2  | -1.3 |
| 5alpha-CHOLESTANOL              | 67.9  | 49.5  | 21.4  | -4.4 | 69.8 | 34.8  | -8.4   | -3.7 |

|                                              |       |       |      |      |      |       |       |      |
|----------------------------------------------|-------|-------|------|------|------|-------|-------|------|
| ESTRONE BENZOATE                             | 60.7  | 42.9  | 27.9 | -3.0 | 52.6 | 26.9  | -19.3 | -3.1 |
| SORBITOL                                     | 58.3  | 34.8  | 16.8 | -2.5 | 64.3 | 32.8  | -15.4 | -2.4 |
| TRICHLORMETHINE                              | 49.4  | 23.3  | 18.8 | -1.8 | 56.4 | 35.3  | -18.4 | -3.2 |
| MEGLUMINE                                    | 43.1  | 28.6  | 25.0 | -2.6 | 71.8 | 27.3  | -6.2  | -0.2 |
| BETAMETHAZONE SODIUM PHOSPHATE               | 19.9  | 7.4   | 30.1 | -0.7 | 53.4 | 33.0  | -5.2  | -3.6 |
| ALFAXALONE                                   | 55.2  | 11.9  | 23.2 | 2.4  | 49.0 | 8.4   | -13.4 | 0.5  |
| ITRACONAZOLE                                 | 29.6  | -2.8  | 27.2 | 2.4  | 56.9 | 23.4  | -19.4 | -0.6 |
| METAMECONINE                                 | 4.6   | -3.8  | 24.8 | -1.3 | 60.5 | 17.3  | -7.2  | -0.6 |
| RABEPRAZOLE SODIUM                           | 13.5  | 4.6   | 13.6 | 4.8  | 35.6 | 15.5  | -13.4 | -2.0 |
| 6-HYDROXYTROPINONE                           | 42.5  | -4.7  | 24.1 | 7.9  | 23.1 | -14.0 | -14.3 | 13.2 |
| BENZYDAMINE HYDROCHLORIDE                    | -11.5 | 20.2  | 12.8 | 0.1  | -2.3 | -3.5  | -13.6 | -1.7 |
| DICHLOROPHENE                                | 58.3  | 49.1  | 47.9 | 1.6  | 71.5 | 41.3  | -22.8 | -1.7 |
| MESALAMINE                                   | 70.4  | 60.3  | -0.1 | -1.4 | 49.6 | 31.4  | -11.8 | -4.3 |
| 6,2'-DIMETHOXYFLAVONE                        | 56.2  | 36.5  | 8.7  | -2.3 | 47.7 | -14.2 | -25.3 | -2.1 |
| AMIODARONE HYDROCHLORIDE                     | 61.7  | 55.9  | 24.7 | -2.6 | 47.7 | 28.6  | 9.7   | -0.9 |
| NIMESULIDE                                   | 29.3  | 24.6  | 7.2  | -4.7 | 56.0 | 19.6  | -10.7 | -3.6 |
| NICOTINE DITARTRATE                          | 73.8  | 55.1  | 21.9 | -3.3 | 54.9 | 32.2  | -16.4 | -3.7 |
| XYLOSE                                       | 29.2  | 20.3  | 20.9 | -1.8 | 45.8 | 4.7   | -5.3  | 0.6  |
| NONOXYNOL-9                                  | 55.3  | 29.8  | 25.4 | -0.5 | 26.0 | 9.1   | 2.8   | -2.1 |
| CYSTINE                                      | 24.2  | 4.5   | 19.7 | -0.4 | 52.6 | 9.4   | -6.8  | -0.9 |
| HEXESTROL                                    | 62.5  | 43.1  | 18.4 | 1.7  | 24.8 | 9.7   | -5.2  | -2.7 |
| PIRIBEDIL HYDROCHLORIDE                      | 40.7  | 9.9   | 14.8 | 1.5  | 47.4 | 6.5   | -21.4 | -1.3 |
| AVOCADENOFURAN                               | 27.2  | 19.2  | 25.8 | 1.2  | 27.3 | 6.0   | -14.5 | 0.6  |
| CYPERMETHRIN                                 | 33.6  | -14.5 | 16.2 | 1.2  | 3.7  | -30.9 | -6.7  | 1.5  |
| SODIUM TETRADECYL SULFATE                    | 21.2  | 31.6  | 3.5  | -1.3 | -5.9 | -7.4  | -9.1  | -0.6 |
| HYDROXYTOLUIC ACID                           | 65.9  | 38.2  | 12.6 | -3.5 | 24.8 | -9.6  | 0.2   | -1.7 |
| CAPSANTHIN                                   | 53.4  | 44.7  | 11.8 | 0.4  | 44.6 | 28.0  | -25.8 | -1.2 |
| CETRIMONIUM BROMIDE                          | 101.7 | 98.4  | 94.5 | 89.9 | 54.0 | 25.6  | -9.2  | 0.1  |
| DEHYDROVARIABILIN                            | 24.6  | 4.1   | 17.5 | -2.1 | 33.1 | 18.1  | -22.9 | -1.0 |
| AMRINONE                                     | 72.6  | 43.5  | 19.2 | -2.8 | 51.7 | 16.3  | -13.1 | -0.7 |
| 1-(2-METHOXYPHENYL)PIRAZINE<br>HYDROCHLORIDE | 70.1  | 50.0  | 10.1 | -3.1 | 42.1 | 24.8  | -7.5  | -1.7 |
| OLSELTAMIVIR PHOSPHATE                       | 58.2  | 33.6  | 20.9 | -1.5 | 42.7 | 0.5   | 2.3   | 1.7  |
| 5-AMINOPENTANOIC ACID<br>HYDROCHLORIDE       | 43.8  | 27.2  | 20.5 | -1.5 | 32.0 | 20.2  | 4.1   | 1.0  |
| BROMOPRIDE                                   | 69.9  | 43.9  | 19.0 | 0.2  | 48.8 | 8.3   | -24.7 | -0.9 |
| 3,6-DIMETHOXYFLAVONE                         | 57.3  | 23.5  | 8.9  | 1.1  | 14.5 | -3.1  | 4.1   | -2.7 |
| EFAROXAN HYDROCHLORIDE                       | 47.4  | 7.8   | 21.3 | 1.8  | 47.3 | 5.6   | -16.4 | 0.4  |
| MELENGESTROL ACETATE                         | -4.8  | -1.8  | 23.8 | 1.2  | 37.1 | 0.9   | -11.4 | 1.0  |
| DROFENINE HYDROCHLORIDE                      | 55.3  | 13.3  | 11.2 | 1.1  | 14.2 | -26.7 | -2.0  | 7.7  |

|                               |       |       |      |      |      |      |        |      |
|-------------------------------|-------|-------|------|------|------|------|--------|------|
| OCTISALATE                    | 5.7   | 0.7   | 23.8 | -1.5 | 14.9 | 6.0  | -25.9  | -1.3 |
| PYRITHYLDIONE                 | 40.9  | 17.1  | 7.5  | -0.9 | 45.5 | 16.6 | -16.7  | -2.9 |
| RISEDRONATE SODIUM HYDRATE    | 51.3  | 44.4  | 10.6 | -1.6 | 59.8 | 32.6 | -21.9  | -4.6 |
| DICHLORISONE ACETATE          | 41.9  | -2.7  | 30.7 | 0.8  | 40.9 | 22.4 | 9.5    | -1.8 |
| DOXAZOSIN MESYLATE            | 36.6  | 30.2  | 20.1 | -3.8 | 57.0 | 35.2 | -17.2  | -2.6 |
| CHICAGO SKY BLUE              | 72.1  | 64.8  | 19.5 | -2.8 | 52.6 | 31.4 | -4.1   | -2.2 |
| ETHAMIVAN                     | 68.2  | 49.9  | 12.3 | -1.4 | 68.1 | 40.3 | -11.9  | -3.6 |
| FORMESTANE                    | 49.1  | 26.3  | 17.1 | -1.7 | 40.1 | 12.4 | -16.7  | 0.4  |
| BUSPIRONE HYDROCHLORIDE       | 53.9  | 36.7  | 20.9 | -3.6 | 48.1 | 28.1 | -11.5  | -2.7 |
| IDEBENONE                     | 59.9  | 40.6  | 10.4 | 3.3  | 39.3 | 17.6 | -22.4  | -1.9 |
| TACRINE HYDROCHLORIDE         | 55.9  | 41.0  | 27.4 | 1.6  | 46.9 | 15.2 | -17.7  | 0.6  |
| TRICLABENDAZOLE               | 31.1  | 14.0  | 34.4 | 0.1  | 30.9 | 6.2  | 2.6    | 0.7  |
| DOCOSANOL                     | -34.1 | 3.1   | 15.5 | 1.4  | 34.4 | 10.3 | -10.2  | -0.9 |
| UVAOL                         | 48.9  | 12.4  | 2.9  | 5.4  | 16.6 | -6.3 | -127.6 | -0.5 |
| FTAXILIDE                     | -77.1 | 23.5  | 18.5 | -0.7 | -0.8 | 3.2  | -16.4  | -2.1 |
| NIFLUMIC ACID                 | 60.8  | 52.4  | 4.7  | -3.0 | 56.7 | 30.3 | -28.8  | -3.2 |
| DIBUTYL PHTHALATE             | 78.4  | 70.9  | 18.1 | -0.2 | 59.7 | 41.5 | -41.3  | -1.5 |
| MOXISYLYTE HYDROCHORIDE       | 47.3  | 14.3  | 30.8 | 0.2  | 44.9 | 13.7 | 10.9   | -3.3 |
| SILIBININ                     | 67.4  | 55.8  | 15.0 | 0.1  | 41.0 | 21.8 | -0.2   | -1.4 |
| XYLOCARPUS A                  | 67.0  | 31.6  | 30.1 | -1.3 | 45.0 | 20.8 | -21.9  | -2.9 |
| 3-HYDROXYTYRAMINE             | 72.8  | 55.0  | 11.0 | -2.7 | 36.6 | 15.1 | -15.7  | -2.5 |
| EUPHOL ACETATE                | 31.7  | 8.3   | 28.2 | -0.7 | 58.0 | 20.8 | -11.2  | -2.2 |
| 4'-METHOXYCHALCONE            | 60.4  | 24.5  | 6.8  | -0.5 | 21.1 | -9.8 | -8.8   | 3.0  |
| L-DEOXYALLIIN                 | 53.9  | 25.9  | 19.9 | -0.6 | 62.2 | 17.2 | -9.6   | -0.2 |
| 4-HYDROXYANTIPYRINE           | 48.9  | 26.7  | 25.0 | 3.1  | 44.3 | 23.5 | -15.6  | 0.1  |
| MANNITOL                      | 16.4  | -15.7 | 17.7 | -2.5 | 40.8 | 6.9  | -5.3   | 0.3  |
| ACETYLTRYPTOPHANAMIDE         | 17.7  | -7.8  | 28.0 | 0.9  | 28.4 | 7.6  | -1.2   | 0.7  |
| L-BUTHIONINE SULFOXIMINE      | 49.3  | 1.5   | 5.5  | 3.2  | 7.2  | -0.4 | -4.8   | 3.4  |
| 3,4'-DIMETHOXYFLAVONE         | -33.6 | -5.0  | 11.4 | -1.5 | 19.2 | 11.2 | -99.0  | -2.9 |
| CHROMOCARB                    | 62.7  | 44.7  | 10.9 | 0.3  | 43.7 | 9.0  | -28.5  | -2.9 |
| PHTHALYLSULFACETAMIDE         | 42.4  | 39.5  | 13.0 | -3.4 | 53.7 | 37.4 | -32.3  | -2.5 |
| ETHAVERINE HYDROCHLORIDE      | 40.6  | 25.6  | 26.1 | -0.4 | 48.6 | 3.5  | -5.1   | -2.7 |
| RIBOFLAVIN 5-PHOSPHATE SODIUM | 28.5  | 24.7  | 30.6 | -1.0 | 58.9 | 38.4 | -26.7  | -2.0 |
| IRIGENOL                      | 54.5  | 29.8  | 14.7 | -0.2 | 44.9 | 10.7 | -43.0  | -2.4 |
| SUCRALOSE                     | 36.2  | 13.5  | 27.4 | -2.7 | 61.6 | 43.8 | -22.9  | -1.4 |
| NIFUROXAZIDE                  | 88.0  | 78.1  | 61.6 | 44.5 | 39.3 | -0.2 | -5.0   | -1.8 |
| ISOETHARINE MESYLATE          | 5.6   | -15.2 | 28.7 | 2.1  | 64.5 | 38.2 | -3.9   | 0.2  |
| MECYSTEINE HYDROCHLORIDE      | 49.6  | 31.4  | 27.8 | 0.6  | 23.9 | -2.0 | -21.9  | -0.3 |
| AZTREONAM                     | 10.6  | 1.9   | 26.7 | 1.3  | 60.4 | 36.2 | -37.8  | -0.6 |
| BAMBUTEROL HYDROCHLORIDE      | 25.5  | 2.6   | 17.5 | 2.8  | 47.3 | 8.7  | -14.6  | -2.0 |

|                                                                                             |       |       |       |      |      |       |       |      |
|---------------------------------------------------------------------------------------------|-------|-------|-------|------|------|-------|-------|------|
| LOXAPINE SUCCINATE                                                                          | 0.9   | -9.5  | 30.6  | 1.0  | 36.8 | 16.0  | -15.5 | -1.7 |
| OXYPHENONIUM BROMIDE                                                                        | 45.8  | 5.3   | 20.8  | 2.7  | 7.4  | -16.6 | -8.3  | 1.8  |
| DIMERCAPROL                                                                                 | -24.5 | -4.3  | 25.5  | 1.8  | 1.7  | -10.8 | -30.9 | -1.7 |
| METAMPICILLIN SODIUM                                                                        | 39.0  | 33.0  | 15.9  | -0.6 | 43.8 | 19.3  | -45.0 | -1.6 |
| OCTODRINE                                                                                   | 67.6  | 61.3  | 15.3  | -0.1 | 51.1 | 39.3  | -26.3 | -5.2 |
| CLORGILINE HYDROCHLORIDE                                                                    | 100.6 | 98.2  | 99.0  | 86.7 | 59.4 | 25.7  | -5.0  | -1.0 |
| ACEXAMIC ACID                                                                               | 27.2  | 31.2  | 24.1  | -1.3 | 56.5 | 32.4  | -17.4 | -1.4 |
| METICRANE                                                                                   | 68.6  | 41.4  | 32.1  | -2.1 | 50.4 | 25.0  | -20.0 | -4.2 |
| TIMONACIC                                                                                   | 31.6  | 17.6  | 23.2  | 0.0  | 34.9 | 25.0  | -7.5  | -4.2 |
| BARBITAL                                                                                    | 30.9  | -5.8  | 28.6  | 2.1  | 45.0 | 7.8   | -11.2 | -1.5 |
| HEXETIDINE                                                                                  | 25.6  | 8.9   | 32.7  | -0.8 | 47.7 | 23.8  | -12.1 | -2.3 |
| DOXIFLURIDINE                                                                               | 97.4  | 86.8  | 80.1  | 53.9 | 84.5 | 59.6  | -1.8  | -2.0 |
| CELASTROL                                                                                   | 100.1 | 97.2  | 100.4 | 96.1 | 54.3 | 10.1  | -4.3  | -2.2 |
| 2,4-DINITROPHENOL                                                                           | 14.2  | -3.8  | 17.8  | 1.7  | 40.9 | 0.1   | -16.2 | -0.2 |
| 2-ETHOXYCARBONYL-2-ETHOXYOXALLOYLOXYDIHYDROCHRYSIN DIMETHYL ETHER                           | 10.5  | -3.4  | 22.4  | 0.0  | 24.4 | -3.9  | -24.3 | -0.4 |
| SOTALOL HYDROCHLORIDE                                                                       | 15.2  | -12.7 | 18.7  | 6.1  | 13.5 | -4.9  | -7.0  | 0.6  |
| IPRIFLAVONE                                                                                 | -71.3 | -5.1  | 24.2  | -1.9 | 8.5  | 1.3   | -5.7  | -1.4 |
| THEAFLAVIN MONOGALLATES                                                                     | 89.8  | 79.1  | 40.8  | -2.5 | 61.8 | 37.7  | -19.3 | -5.7 |
| ACETYLTRYPHTOPHAN                                                                           | 44.7  | 40.2  | 19.6  | 0.4  | 59.0 | 33.1  | -36.1 | -3.7 |
| ALEXIDINE HYDROCHLORIDE                                                                     | 64.7  | 39.3  | 30.2  | -1.9 | 42.8 | 8.0   | -13.8 | -1.9 |
| FURALTADONE                                                                                 | 73.7  | 55.2  | 26.7  | -1.7 | 49.5 | 34.4  | -19.6 | -2.4 |
| PIPEMIDIC ACID                                                                              | 33.2  | 11.4  | 23.4  | 0.4  | 38.7 | 12.7  | -10.6 | -1.4 |
| TRICHLORFON                                                                                 | 49.7  | 26.5  | 31.8  | 0.3  | 62.8 | 42.9  | -16.3 | -2.6 |
| FENDILINE HYDROCHLORIDE                                                                     | 43.2  | 8.5   | 34.0  | 0.5  | 30.3 | 3.2   | -12.8 | -2.5 |
| SELEGILINE HYDROCHLORIDE                                                                    | 15.1  | 19.1  | 27.2  | 1.5  | 44.5 | 23.5  | -11.5 | 0.8  |
| PASINIAZID                                                                                  | 22.2  | -21.4 | 29.6  | 2.8  | 28.6 | -10.2 | -11.8 | -1.9 |
| COLISTIN SULFATE                                                                            | 42.6  | -18.0 | 27.3  | 2.1  | 46.0 | 14.3  | -33.2 | -1.7 |
| 2-METHYLENE-5-(2,5-DIOXOTETRAHYDROFURAN-3-YL)-6-OXO--10,10-DIMETHYLBICYCLO[7: 2: 0]UNDECANE | 4.5   | -11.5 | 27.2  | 0.5  | 27.2 | 3.5   | -17.9 | -2.2 |
| FLORFENICOL                                                                                 | 99.9  | 96.2  | 97.1  | 84.7 | 77.8 | 68.5  | -13.4 | -2.5 |
| BUFLOMEDIL HYDROCHLORIDE                                                                    | 17.1  | -8.0  | 22.2  | 1.3  | 9.4  | -22.2 | -1.5  | 2.0  |
| TYLOXAPOL                                                                                   | -6.4  | 9.3   | 25.6  | 1.6  | -8.4 | -1.6  | -29.5 | -2.9 |
| DROPROPIZINE                                                                                | 31.1  | 37.2  | 21.7  | -1.3 | 56.4 | 25.9  | -33.8 | -1.5 |
| DIAZOXIDE                                                                                   | 54.1  | 44.6  | 18.0  | -0.4 | 56.7 | 38.1  | -54.0 | -0.7 |
| PEMPIDINE TARTRATE                                                                          | 13.2  | 26.1  | 26.9  | -0.9 | 40.2 | 22.7  | -3.9  | -2.9 |
| METOLAZONE                                                                                  | 11.3  | 26.4  | 29.0  | -1.8 | 56.8 | 33.8  | -6.5  | -1.0 |
| ETICLOPRIDE HYDROCHLORIDE                                                                   | 42.6  | 24.8  | 38.9  | 0.7  | 40.4 | 1.4   | -19.5 | -1.2 |

|                             |        |       |      |      |       |       |        |      |
|-----------------------------|--------|-------|------|------|-------|-------|--------|------|
| ANIRACETAM                  | 69.1   | 50.7  | 34.7 | 0.7  | 54.4  | 29.3  | -10.4  | -1.7 |
| EPIESTRIOL                  | 15.9   | 18.1  | 27.4 | -0.2 | 46.5  | 10.2  | -13.4  | -1.6 |
| DIPYROCETYL                 | 68.1   | 49.2  | 23.8 | 0.4  | 44.9  | 25.6  | -11.8  | -0.5 |
| PROTOVERATRINE B            | 28.4   | 22.5  | 34.2 | 2.4  | 33.6  | 8.5   | -2.1   | -0.2 |
| METHYL ORSELLINATE          | 55.5   | 29.8  | 23.1 | 0.8  | 49.6  | 17.3  | -25.9  | 0.0  |
| OXEDRINE                    | -17.2  | -19.8 | 25.9 | 3.0  | 38.2  | 13.5  | -19.1  | -2.6 |
| FIPEXIDE HYDROCHLORIDE      | -17.3  | -22.5 | 22.5 | 1.2  | 29.5  | 5.9   | -22.6  | 1.1  |
| EFLOXATE                    | -14.4  | -11.5 | 20.1 | 9.5  | 8.4   | -17.1 | -35.5  | 0.1  |
| DIALLYL SULFIDE             | -40.8  | 1.0   | 26.4 | -1.5 | -7.0  | 5.9   | -9.7   | -2.5 |
| TARTARIC ACID               | 39.0   | 25.5  | 20.0 | 0.0  | 47.7  | 18.6  | -40.4  | -3.5 |
| IDAZOXAN HYDROCHLORIDE      | 39.3   | 34.3  | 18.5 | 0.9  | 50.8  | 32.7  | -17.2  | -1.0 |
| PROPARACAINE HYDROCHLORIDE  | 3.1    | -4.9  | 30.8 | 0.2  | 38.6  | -4.3  | -22.4  | -2.9 |
| CYCLOCREATINE               | 6.7    | 28.6  | 33.6 | -0.1 | 42.8  | 26.9  | -17.6  | -1.6 |
| PYRITINOL                   | 35.8   | 14.6  | 33.0 | 1.4  | 43.9  | 8.4   | -17.8  | -1.7 |
| ROSOLIC ACID                | 44.7   | 29.2  | 23.8 | -2.0 | 42.0  | 23.4  | -43.1  | -3.8 |
| AVOCADYNE ACETATE           | -7.5   | -3.4  | 37.4 | 2.9  | 38.2  | 3.7   | -6.9   | -1.9 |
| ARGININE HYDROCHLORIDE      | 23.7   | 12.1  | 38.3 | -1.1 | 48.2  | 20.1  | -4.7   | -0.3 |
| CARZENIDE                   | 15.5   | 4.9   | 33.6 | 4.1  | 50.1  | 6.0   | -16.2  | -2.2 |
| BEPHENIUM HYDROXYNAPHTHOATE | 32.8   | 28.1  | 19.5 | 1.0  | 52.8  | 25.2  | -47.0  | -1.3 |
| PIMETHIXENE MALEATE         | 10.3   | -4.4  | 44.5 | 0.0  | 24.7  | -5.4  | -10.5  | -2.8 |
| CEFTAZIDIME                 | -22.8  | -10.9 | 30.2 | 1.8  | 29.0  | 10.4  | -20.0  | -1.2 |
| 3-ACETYLCOUMARIN            | 19.5   | -4.5  | 33.4 | 11.7 | 9.2   | -29.8 | -12.4  | 2.4  |
| ARSENIC TRIOXIDE            | -50.8  | -1.8  | 32.9 | 5.1  | -12.0 | -1.2  | -21.7  | -1.3 |
| beta-CARYOPHYLLENE ALCOHOL  | 8.3    | 10.0  | 24.9 | -1.1 | 40.2  | 12.1  | -9.2   | -2.0 |
| ETHYNODIOL DIACETATE        | 43.0   | 32.0  | 17.1 | 0.5  | 42.7  | 16.7  | -41.1  | -2.2 |
| PRONETALOL HYDROCHLORIDE    | 9.8    | 11.2  | 28.5 | -0.5 | 48.7  | 13.4  | -5.0   | -1.6 |
| THIAMYLAL SODIUM            | -2.3   | 10.8  | 31.9 | 0.5  | 45.8  | 29.9  | -53.5  | -1.6 |
| DINITOLMIDE                 | 53.9   | 27.8  | 19.7 | 1.9  | 50.3  | 16.1  | -24.4  | -2.0 |
| DILTIAZEM HYDROCHLORIDE     | 65.4   | 38.9  | 20.4 | 0.4  | 45.2  | 25.9  | -26.2  | -1.9 |
| IPRONIAZID SULFATE          | 27.8   | 10.2  | 26.1 | 1.0  | 53.0  | 20.1  | -31.1  | -2.5 |
| AMOXAPINE                   | 46.9   | 28.9  | 33.0 | 0.6  | 39.2  | 16.4  | -18.6  | 0.1  |
| CHAULMOSULFONE              | 3.3    | 9.6   | 32.4 | -0.4 | 47.4  | 6.8   | -114.5 | -3.0 |
| PENTOXIFYLLINE              | 58.0   | 29.0  | 32.5 | 1.5  | 45.9  | 12.2  | -25.6  | -1.5 |
| GLUTAMINE (L)               | -42.2  | 3.9   | 12.8 | 1.8  | 39.7  | 7.0   | -36.0  | -2.0 |
| ESTRAGOLE                   | 47.6   | 23.5  | 29.3 | -0.2 | 25.3  | 8.9   | -26.7  | 1.1  |
| ACRIFLAVINIUM HYDROCHLORIDE | 22.1   | -4.0  | 25.5 | 0.8  | 20.5  | -2.2  | -19.7  | 7.4  |
| DIBEKACIN                   | -113.2 | 17.4  | 26.2 | 1.7  | -11.3 | 19.6  | -35.7  | -2.8 |
| NAFTOPIDIL DIHYDROCHLORIDE  | 26.5   | 18.9  | 18.3 | -0.3 | 40.7  | 12.6  | -58.0  | -2.1 |
| EMODIN                      | 70.2   | 62.4  | 29.5 | 1.9  | 65.5  | 38.2  | -31.8  | -1.3 |
| BITOSCANATE                 | 40.4   | 21.8  | 23.5 | -0.3 | 42.0  | 6.7   | -32.3  | -0.2 |

|                                                                   |       |       |       |      |       |       |       |      |
|-------------------------------------------------------------------|-------|-------|-------|------|-------|-------|-------|------|
| PEUCENIN                                                          | 58.1  | 67.9  | 14.2  | -0.3 | 55.4  | 39.0  | -12.6 | -1.4 |
| BUCETIN                                                           | 44.2  | 19.5  | 20.8  | 0.6  | 36.3  | 7.5   | -34.1 | -1.8 |
| BECLAMIDE                                                         | 42.4  | -26.8 | -13.1 | -3.3 | -30.6 | -14.8 | -49.6 | -0.4 |
| CHLOROPYRAMINE HYDROCHLORIDE                                      | 31.1  | -0.5  | -6.1  | -0.9 | 4.9   | -13.5 | -56.4 | -2.5 |
| alpha-CYANO-4-HYDROXYCINNAMIC ACID                                | 68.6  | 22.4  | -11.7 | -4.1 | 11.4  | -3.1  | -56.3 | 3.8  |
| PROTOPORPHYRIN IX                                                 | 6.4   | -3.8  | -19.8 | 0.0  | 21.3  | -31.9 | -50.4 | -0.4 |
| 2-AMINOBENZENESULFONAMIDE                                         | 40.5  | -17.1 | 10.2  | -2.5 | 24.6  | -2.3  | -9.3  | 1.6  |
| CANAVANINE                                                        | 10.1  | -7.7  | 1.7   | -2.5 | 30.0  | -46.6 | -28.6 | 1.5  |
| SPARTEINE HYDROIODIDE                                             | 35.5  | -19.1 | -0.5  | -1.9 | 34.1  | 5.4   | -14.2 | 2.9  |
| DIHYDROCELASTROL                                                  | 36.6  | -25.7 | 21.6  | -0.4 | 28.5  | -27.6 | -76.3 | 12.9 |
| DIPERODON HYDROCHLORIDE                                           | 17.5  | -18.8 | 10.7  | -2.4 | 11.6  | -9.8  | -7.8  | 3.8  |
| SULMAZOLE                                                         | -0.4  | -33.7 | 1.2   | 12.1 | 32.9  | -22.2 | 3.1   | 17.2 |
| GABAPENTIN                                                        | 20.5  | -14.0 | 1.3   | -0.4 | 17.4  | -7.4  | -0.9  | 5.0  |
| 3-ACETAMIDOCOUMARIN                                               | 7.8   | -27.4 | 16.6  | 9.8  | 30.0  | -32.2 | 6.8   | 1.6  |
| CLONAZEPAM                                                        | -11.0 | -23.9 | 18.4  | 4.2  | 12.0  | -5.0  | -11.4 | -1.8 |
| FUSARIC ACID                                                      | 9.9   | -16.7 | 14.6  | 47.4 | -7.3  | -71.3 | 1.4   | 22.3 |
| ORNIDAZOLE                                                        | 13.2  | -22.4 | 7.8   | -1.5 | 9.8   | -12.4 | -48.9 | 0.4  |
| HEMICHOLINIUM BROMIDE                                             | 10.1  | -12.7 | 3.9   | 4.2  | 27.2  | -3.9  | -66.0 | 2.8  |
| CHLORDIAZEPOXIDE                                                  | 32.3  | 11.2  | -5.4  | -0.9 | 26.4  | 12.0  | -59.6 | -4.1 |
| TROXERUTIN                                                        | 24.3  | -1.0  | 4.5   | -0.9 | 38.0  | 0.6   | -7.8  | -0.6 |
| GLYBURIDE                                                         | 21.1  | 1.1   | -3.2  | -1.3 | 35.0  | 9.7   | -33.4 | -0.7 |
| DIMETHYL 4,4-o-PHENYLENE-BIS (3-THIOPHANATE)                      | 17.5  | -25.9 | -0.6  | -2.6 | 49.4  | 9.6   | -14.1 | -2.0 |
| BUTYL PARABEN                                                     | 31.3  | -5.6  | -6.0  | -1.9 | 47.9  | 19.5  | -31.4 | 0.2  |
| DEFERIPRONE                                                       | 13.5  | -17.3 | 21.7  | 2.0  | 25.5  | -3.9  | 16.1  | 3.7  |
| AZTREONAM                                                         | 22.7  | -14.8 | 16.6  | -3.0 | 25.0  | 4.8   | 8.7   | 1.4  |
| OXALAMINE CITRATE                                                 | 27.3  | -9.1  | 0.7   | 14.6 | 44.1  | 2.1   | -6.7  | -0.6 |
| AMINOTHIAZOLE                                                     | 20.4  | -8.2  | 5.0   | -2.8 | 40.2  | 17.7  | -29.7 | -0.8 |
| 3-BROMO-4-METHYL-3,4-HEXAMETHYLENE-3,4-DIHYDRODIAZETE-1,2-DIOXIDE | 38.3  | -2.7  | 12.6  | 0.6  | 30.8  | 7.4   | -9.6  | -2.0 |
| CLOPERASTINE HYDROCHLORIDE                                        | 9.5   | -8.4  | 23.7  | 15.7 | 20.8  | 8.6   | -59.2 | 0.5  |
| ZARDAVERINE                                                       | 1.8   | -19.0 | 6.8   | 27.7 | -3.8  | -49.1 | -5.8  | 5.5  |
| ETHACRIDINE LACTATE                                               | 3.7   | -2.8  | 8.6   | -1.0 | 12.1  | 2.7   | -30.5 | 4.7  |
| DIACETAMATE                                                       | 28.6  | 0.7   | 2.0   | -2.5 | 36.7  | 14.1  | -37.7 | -1.0 |
| 5alpha-ANDROSTAN-3,17-DIONE                                       | 49.0  | 12.9  | -4.3  | -1.7 | 35.1  | 22.5  | -27.4 | -2.6 |
| REBAMIPIDE                                                        | 40.3  | 0.6   | 7.0   | -2.2 | 57.7  | 22.4  | -22.4 | -0.7 |
| 1,3,5-TRIMETHOXYBENZENE                                           | 36.5  | 4.0   | 9.5   | -1.3 | 45.0  | 19.8  | -18.6 | 0.0  |
| 6-AMINONICOTINAMIDE                                               | 38.7  | -0.1  | -11.0 | -2.6 | 57.8  | 20.6  | -29.9 | 0.8  |
| TROLOX                                                            | 41.7  | -8.2  | 1.1   | -2.1 | 50.7  | 23.4  | -22.5 | -0.4 |
| 2-THIOURACIL                                                      | 26.4  | -8.3  | 12.7  | -1.9 | 35.5  | 4.3   | -7.9  | 0.1  |

|                                                       |      |       |       |      |       |       |       |      |
|-------------------------------------------------------|------|-------|-------|------|-------|-------|-------|------|
| ISAXONINE                                             | 24.1 | -17.3 | 17.9  | -2.4 | 23.7  | 17.6  | 0.8   | -1.0 |
| DIACERIN                                              | 34.1 | 5.1   | -5.0  | -2.8 | 56.4  | 18.0  | -36.2 | -0.1 |
| 3alpha-HYDROXY-3-DEOXYANGOLENSIC<br>ACID METHYL ESTER | 30.1 | -4.2  | 3.5   | -0.7 | 41.9  | 24.5  | -10.6 | -0.3 |
| TOTAROL-19-CARBOXYLIC ACID, METHYL<br>ESTER           | 43.1 | 5.8   | 17.2  | -3.0 | 30.9  | 12.2  | -26.2 | 3.9  |
| DIATRIZOIC ACID                                       | 6.4  | -20.0 | 14.0  | 6.8  | 29.9  | 12.6  | -19.6 | 3.0  |
| ACETAMINOSALOL                                        | 25.1 | 3.7   | 15.3  | -0.4 | -11.4 | -13.0 | -20.8 | 0.7  |
| ELETRIPTAN HYDROBROMIDE                               | 32.2 | -9.7  | 18.8  | 2.0  | -4.6  | 7.6   | -37.7 | -0.8 |
| GABOXADOL HYDROCHLORIDE                               | 36.4 | 3.0   | 2.0   | -1.7 | 34.6  | 7.9   | -44.5 | -2.7 |
| BENZBROMARONE                                         | 92.7 | 83.9  | 44.8  | -0.3 | 72.7  | 64.4  | 9.4   | -2.2 |
| 3-AMINO-beta-PINENE                                   | 42.6 | 2.4   | 0.0   | -2.8 | 41.3  | 2.0   | -16.8 | 7.6  |
| OXANTEL PAMOATE                                       | 50.0 | 17.7  | 6.1   | -3.9 | 48.8  | 25.9  | -29.7 | -0.7 |
| HOMIDIUM BROMIDE                                      | 89.7 | 94.0  | 90.9  | 77.8 | 69.5  | 21.5  | -3.7  | -2.7 |
| ASTEMIZOLE                                            | 46.8 | -5.6  | 20.5  | -2.7 | 46.6  | 16.0  | -32.9 | -3.0 |
| PIPENZOLATE BROMIDE                                   | 33.6 | -2.1  | 2.7   | -2.1 | 34.0  | -2.5  | -1.0  | 1.8  |
| MIANSERIN HYDROCHLORIDE                               | 36.0 | 5.1   | 29.9  | -3.7 | 36.8  | 15.0  | -3.7  | 6.8  |
| LUPININE                                              | 36.3 | -0.6  | 2.4   | -0.1 | 38.8  | 9.6   | -14.6 | 2.1  |
| DECAMETHONIUM BROMIDE                                 | 22.0 | -2.4  | 16.3  | -1.3 | 38.9  | 17.0  | -18.0 | -2.5 |
| TIRATRICOL                                            | 57.0 | 20.0  | 9.2   | -2.0 | 28.4  | 13.6  | -19.8 | -2.4 |
| CEFAZOLIN SODIUM                                      | 30.7 | -13.8 | 28.3  | -1.5 | 37.1  | 20.3  | -17.8 | -2.4 |
| URAPIDIL HYDROCHLORIDE                                | 12.3 | -27.4 | 25.9  | 14.3 | 12.1  | -28.5 | -7.4  | 15.1 |
| BENFOTIAMINE                                          | 26.6 | -9.1  | 4.4   | -2.5 | 19.3  | 8.3   | -25.6 | 2.5  |
| TIOXOLONE                                             | 60.4 | 11.3  | 5.9   | 3.6  | 41.0  | 13.4  | -41.3 | -2.2 |
| DIHYDROJASMONIC ACID                                  | 55.4 | 26.8  | -6.7  | -2.6 | 49.1  | 36.6  | -25.9 | -1.9 |
| CYCLANDELATE                                          | 44.3 | 11.4  | 21.9  | -3.2 | 52.3  | 17.5  | -32.2 | -2.3 |
| meta-CRESYL ACETATE                                   | 44.9 | 10.3  | 1.8   | -4.9 | 46.9  | 31.2  | -14.7 | 0.5  |
| METACETAMOL                                           | 48.6 | -13.4 | 18.9  | -3.9 | 46.7  | 17.4  | -10.4 | -4.5 |
| CHLORQUINALDOL                                        | 45.7 | 8.6   | 4.6   | -3.0 | 54.3  | 33.1  | -23.1 | -2.4 |
| TYROSINE                                              | 35.0 | -1.1  | 24.1  | -4.2 | 36.3  | 12.1  | 1.9   | 0.5  |
| 3beta-HYDROXY-23,24-BISNORCHOL-5-ENIC<br>ACID         | 38.7 | 22.8  | 15.6  | -2.5 | 24.0  | 8.5   | 17.9  | 0.9  |
| QUINOLINIC ACID                                       | 27.2 | -13.3 | 9.2   | 0.9  | 44.6  | 15.1  | -24.0 | -1.3 |
| SODIUM FLUOROACETATE                                  | 22.9 | -5.6  | 1.8   | 2.3  | 49.0  | 29.4  | -41.4 | -1.0 |
| COTARNINE CHLORIDE                                    | 45.4 | 3.1   | 18.6  | -1.6 | 34.4  | 16.6  | -8.8  | -2.5 |
| PYROGALLIN                                            | 45.6 | -3.3  | 19.1  | -0.8 | 27.5  | 12.3  | -15.3 | 0.3  |
| CRESOPIRINE                                           | 31.5 | -7.9  | 13.9  | 5.2  | 19.0  | -25.8 | 11.2  | 25.2 |
| OXIGLUTATIONE DISODIUM SALT                           | 59.7 | 3.9   | 4.4   | -2.5 | 12.4  | 0.7   | -18.0 | 2.7  |
| CHAULMOOGRIC ACID                                     | 54.4 | 16.8  | -12.0 | -0.9 | 18.8  | -2.3  | -64.9 | -3.8 |
| PANTOTHENIC ACID(d) Na salt                           | 78.6 | 50.8  | -3.5  | -2.8 | 37.8  | 24.1  | -41.0 | -1.2 |

|                                             |      |       |      |      |       |       |        |      |
|---------------------------------------------|------|-------|------|------|-------|-------|--------|------|
| EBSELEN                                     | 70.0 | 16.7  | 22.7 | -1.9 | 47.2  | 15.8  | -14.9  | -2.3 |
| ARIPIRAZOLE                                 | 57.6 | 19.1  | 16.4 | -4.0 | 34.2  | 18.1  | -34.7  | -0.9 |
| RAMIFENAZONE                                | 60.0 | 24.6  | 6.7  | -4.7 | 60.3  | 29.1  | -11.6  | -3.7 |
| BROMPERIDOL                                 | 60.3 | 9.8   | 14.2 | -3.2 | 48.1  | 24.3  | -8.1   | -1.1 |
| PURPUROGALLIN                               | 58.8 | 25.5  | 22.0 | -4.9 | 27.7  | 6.3   | 6.8    | 0.7  |
| PROTRYPTYLINE HYDROCHLORIDE                 | 51.7 | 6.7   | 18.8 | -1.1 | 30.8  | 17.6  | 13.7   | -0.4 |
| PREGNENOLONE                                | 48.1 | 14.6  | 9.7  | -2.0 | 35.9  | 10.9  | -18.5  | -1.2 |
| ACECAINIDE HYDROCHLORIDE                    | 33.9 | 0.2   | 9.8  | -2.5 | 41.5  | 23.4  | -16.3  | -3.0 |
| CARBIMAZOLE                                 | 54.7 | 12.1  | 9.5  | -2.3 | 28.4  | 13.6  | -12.1  | -0.7 |
| VESAMICOL HYDROCHLORIDE                     | 29.2 | -7.2  | 25.4 | -0.7 | 27.6  | 21.7  | -34.7  | -0.9 |
| TETRACHLOROISOPHTHALONITRILE                | 33.2 | -44.0 | 30.6 | 12.0 | 11.0  | -49.3 | -138.7 | 0.1  |
| CARBADOX                                    | 30.4 | 0.1   | 13.0 | -1.8 | 39.7  | 2.6   | -28.3  | -4.7 |
| CARSALAM                                    | 3.7  | 9.9   | 36.1 | -2.5 | 6.8   | 16.9  | -2.3   | -0.9 |
| TUBOCURARINE CHLORIDE                       | 55.5 | 22.1  | 9.7  | -4.2 | 38.6  | 14.3  | -35.8  | -3.7 |
| TOSYLCHLORAMIDE SODIUM                      | 51.5 | 20.5  | 17.2 | -3.7 | 44.1  | 33.0  | -21.5  | -4.8 |
| AMINOPTERIN                                 | 30.0 | -0.8  | 17.6 | -3.8 | 45.3  | 32.4  | -41.3  | -2.4 |
| DEOXYCHOLIC ACID                            | 46.3 | 11.2  | -6.2 | -5.2 | 55.8  | 26.1  | -97.3  | -2.6 |
| PENTAMIDINE ISETHIONATE                     | 48.2 | 7.0   | 18.3 | -3.4 | 53.4  | 30.1  | -18.8  | -2.5 |
| HALOTHANE                                   | 49.0 | -1.7  | 17.5 | -4.1 | 36.4  | 9.4   | 11.1   | 0.0  |
| PURPURIN                                    | 43.5 | -2.3  | -2.0 | -4.3 | 29.8  | -0.2  | 9.2    | 2.2  |
| DEACETOXY(7)-7-OXOKHIVORINIC ACID           | 47.9 | 5.9   | 9.8  | -4.5 | 46.0  | 23.1  | -17.7  | -1.4 |
| ORBIFLOXACIN                                | 98.7 | 97.1  | 97.8 | 34.8 | 78.7  | 66.4  | -9.7   | -2.0 |
| PRISTIMERIN                                 | 46.6 | 0.0   | 17.8 | -2.6 | 17.7  | 5.7   | -19.9  | -1.3 |
| PHYSCION                                    | 13.6 | -7.6  | 23.5 | -2.0 | 34.7  | 20.5  | -7.1   | -1.6 |
| CITIOLONE                                   | 10.7 | -13.4 | 3.8  | 10.2 | 15.9  | -29.9 | 6.4    | 14.1 |
| HYDROQUININE HYDROBROMIDE HYDRATE           | 1.8  | -12.3 | 21.9 | 3.0  | -19.4 | 21.3  | -32.1  | -2.4 |
| DIHYDROGEDUNIC ACID, METHYL ESTER           | 60.1 | 21.1  | 13.2 | -2.2 | 37.5  | 17.4  | -33.2  | -4.5 |
| METHYL 7-DESHYDROXYPYROGALLIN-4-CARBOXYLATE | 45.5 | 22.8  | 11.4 | -0.7 | 58.0  | 49.5  | -35.4  | -2.5 |
| DIHYDROCELASTRYL DIACETATE                  | 57.5 | 20.6  | 44.6 | 0.5  | 38.5  | 9.8   | -121.7 | -0.2 |
| POMIFERIN                                   | 52.5 | 22.8  | 26.2 | -2.7 | 35.9  | 33.2  | -6.4   | -2.9 |
| NORSTICTIC ACID                             | 27.5 | -11.7 | 21.1 | -1.1 | 50.7  | 15.5  | -60.7  | -4.4 |
| DESONIDE                                    | 40.0 | 2.3   | -0.4 | 0.5  | 49.0  | 35.1  | 1.6    | -2.5 |
| ACETYL-L-LEUCINE                            | 33.3 | 0.4   | 23.2 | -2.6 | 30.6  | 1.0   | 11.2   | 1.1  |
| ZILEUTON                                    | 35.0 | 2.7   | 16.3 | -3.3 | 33.0  | 19.5  | 0.8    | -0.8 |
| METHOPRENE (S)                              | 12.3 | -24.1 | 27.2 | -1.3 | 44.4  | 16.0  | -16.5  | -0.1 |
| CYPROHEPTADINE HYDROCHLORIDE                | 35.8 | -6.7  | 21.3 | -2.7 | 35.8  | 27.0  | -14.3  | -2.6 |
| METERGOLINE                                 | 21.9 | -13.1 | 16.4 | -0.9 | 36.7  | 17.8  | -8.8   | -4.0 |
| PHYTONADIONE                                | 39.2 | -10.6 | 18.5 | 0.0  | 35.8  | 13.3  | 5.4    | 1.2  |
| PHENOTHRIN                                  | 13.0 | -10.6 | 3.8  | -1.6 | 8.9   | -29.5 | -140.1 | 1.0  |

|                                              |      |       |      |      |       |       |       |      |
|----------------------------------------------|------|-------|------|------|-------|-------|-------|------|
| FLUROTHYL                                    | 5.3  | -4.8  | 0.8  | -1.7 | -8.3  | -0.6  | -25.5 | -1.7 |
| NIFENAZONE                                   | 73.8 | 40.1  | -8.0 | -2.8 | 20.4  | 41.5  | -27.4 | -3.5 |
| NIZATIDINE                                   | 64.4 | 33.8  | 9.7  | -2.8 | 37.5  | 29.5  | -35.2 | -2.8 |
| SARMENTOSIDE B                               | 70.0 | 34.3  | -0.9 | -2.2 | 51.0  | 18.5  | -64.9 | -0.6 |
| ENROFLOXACIN                                 | 99.4 | 98.9  | 98.9 | 64.9 | 84.4  | 62.5  | 39.3  | -2.8 |
| beta-NAPHTHOL                                | 71.6 | 35.2  | -1.3 | -2.1 | 55.8  | 23.8  | -15.3 | -1.5 |
| TOLMETIN SODIUM                              | 66.5 | 39.1  | 2.6  | -2.1 | 41.8  | 20.3  | -62.4 | -4.1 |
| CINCHOPHEN                                   | 52.0 | 20.1  | 12.2 | -2.3 | 31.1  | 8.3   | 9.4   | -0.8 |
| RUTILANTINONE                                | 53.3 | 9.6   | 11.3 | -4.2 | 26.1  | 7.5   | 5.7   | 1.2  |
| CHLORINDIONE                                 | 44.3 | 1.1   | 4.8  | 0.2  | 41.1  | 15.4  | -10.6 | -1.9 |
| HYDRASTININE HYDROCHLORIDE                   | 33.1 | -4.5  | 23.8 | -1.8 | 39.8  | 21.1  | -23.6 | -1.8 |
| VINCAMINE                                    | 26.4 | -10.0 | 7.0  | -1.3 | 37.5  | 6.7   | -4.5  | -1.7 |
| FOSFOSAL                                     | 35.1 | -4.9  | 23.2 | -3.7 | 28.4  | 14.2  | -3.6  | 0.6  |
| MIZORIBINE                                   | 14.1 | -24.5 | 14.8 | 2.9  | 16.5  | -14.4 | 4.5   | 5.0  |
| ZAPRINAST                                    | 44.7 | -13.5 | 7.0  | -2.0 | -5.6  | 4.4   | -20.7 | 0.3  |
| LIPOAMIDE                                    | 73.8 | 55.3  | -4.6 | -4.1 | 30.8  | 7.5   | -41.7 | -1.9 |
| RIBOSTAMYCIN SULFATE                         | 58.4 | 27.8  | 8.8  | -2.3 | 42.0  | 34.0  | -19.7 | -4.2 |
| STROPHANTHIDINIC ACID LACTONE<br>ACETATE     | 62.0 | 16.8  | 2.8  | -5.2 | 38.5  | 10.1  | -56.4 | -4.4 |
| OXYTHIAMINE CHLORIDE HYDROCHLORIDE           | 72.2 | 34.2  | 11.6 | -3.4 | 49.9  | 9.4   | -57.6 | -1.6 |
| SUMATRIPTAN                                  | 55.3 | 15.4  | 9.5  | -4.0 | 42.8  | 18.9  | -6.9  | -3.5 |
| CYCLOBENZAPRINE HYDROCHLORIDE                | 43.9 | 12.8  | 17.0 | -3.5 | 46.7  | 26.2  | -31.4 | -4.1 |
| MEPIROXOL                                    | 38.7 | 4.9   | 21.9 | -2.7 | 31.6  | 9.0   | 5.8   | 1.3  |
| GLYCOCHOLIC ACID                             | 37.8 | -6.6  | 20.9 | 0.6  | 33.8  | 17.5  | 3.7   | -0.9 |
| 2,6-DIMETHOXYQUINONE                         | 49.5 | 9.4   | 4.4  | 0.5  | 40.2  | 22.2  | 10.2  | 2.7  |
| DECAHYDROGAMBOGIC ACID                       | 27.9 | -6.0  | 14.1 | -1.6 | 40.5  | 26.7  | -21.6 | 0.9  |
| ROCELLIC ACID                                | 48.8 | 16.6  | 1.8  | -0.9 | 23.9  | 13.1  | 7.5   | -0.4 |
| KHAYANTHONE                                  | 30.3 | -10.1 | 33.9 | 7.4  | 25.9  | 15.6  | -10.6 | -1.9 |
| IRETOL                                       | 16.2 | -11.6 | 20.7 | 4.4  | 21.2  | -15.0 | 7.9   | 22.5 |
| 3-DEACETYLKHIVORIN                           | 27.4 | -10.0 | 7.6  | -2.2 | -14.1 | 14.0  | -21.5 | -1.3 |
| DEHYDROROTENONE                              | 53.3 | 29.4  | 7.5  | -4.3 | 37.7  | 16.1  | -34.0 | -2.6 |
| 1,2alpha-<br>EPOXYDEACETOXYDIHYDROGEDUNIN    | 70.9 | 49.5  | -1.8 | -3.8 | 42.6  | 35.0  | -57.0 | -4.6 |
| MUNDOSERONE                                  | 39.8 | 10.8  | 10.3 | -3.8 | 47.0  | 17.0  | -34.8 | -2.0 |
| 3-DEOXO-3beta-<br>ACETOXYDEOXYDIHYDROGEDUNIN | 51.2 | 11.7  | 8.2  | -4.6 | 37.2  | 28.0  | -33.0 | -2.0 |
| ORSELLINIC ACID                              | 16.9 | 6.5   | 16.4 | -4.3 | 48.7  | 18.9  | -5.6  | -2.7 |
| DIHYDROGEDUNIN                               | 52.9 | 17.2  | 21.8 | -5.8 | 50.7  | 35.2  | -10.5 | -3.1 |
| 1-MONOPALMITIN                               | 32.0 | 3.8   | 20.4 | -4.0 | 37.5  | 18.0  | 2.4   | 1.4  |
| ALPINETIN METHYL ETHER                       | 44.8 | 7.2   | 26.5 | -3.1 | 33.3  | 21.1  | -5.3  | -1.1 |

|                                              |      |       |       |      |       |       |        |      |
|----------------------------------------------|------|-------|-------|------|-------|-------|--------|------|
| 2-HYDROXY-5 (6)EPOXY-TETRAHYDROCARYOPHYLLENE | 34.0 | 0.0   | 18.8  | -1.9 | 46.1  | 17.9  | -2.9   | 1.4  |
| ARTEMISININ                                  | 35.3 | -4.9  | 16.7  | -0.5 | 34.4  | 28.0  | -11.9  | -0.9 |
| HYMECROMONE METHYL ETHER                     | 25.8 | -7.0  | 14.3  | 0.0  | 33.1  | 13.4  | 6.2    | -2.2 |
| PALMATINE CHLORIDE                           | 27.6 | -5.7  | 31.7  | -1.6 | 39.6  | 28.9  | -12.5  | 0.9  |
| CATECHIN TETRAMETHYLETHER                    | 18.3 | -14.2 | 12.4  | 6.2  | 20.6  | -8.9  | -7.4   | 12.7 |
| PANTETHINE                                   | -6.3 | 2.3   | 3.4   | -2.6 | -6.5  | 0.4   | -10.6  | 0.2  |
| VISNAGIN                                     | 78.5 | 55.5  | 13.1  | -5.0 | 39.2  | 9.0   | -34.3  | -4.1 |
| LAPACHOL                                     | 56.6 | 20.0  | 12.9  | -4.1 | 46.3  | 24.0  | -29.3  | -0.9 |
| CHRYSANTHEMIC ACID, ETHYL ESTER              | 57.6 | 33.3  | 26.7  | -2.5 | 53.5  | 34.6  | -25.0  | -1.8 |
| SPAGLUMIC ACID                               | 35.8 | 10.5  | 19.3  | -4.1 | 35.0  | 28.1  | -24.9  | -1.1 |
| 4-HYDROXY-6-METHYLPYRAN-2-ONE                | 66.8 | 33.7  | 18.5  | -4.6 | 63.1  | 32.2  | -15.5  | -0.4 |
| 2,6-DIHYDROXY-4-METHOXYTOLUENE               | 39.7 | 4.9   | 24.4  | -3.1 | 53.1  | 39.2  | -12.6  | -1.7 |
| PAEONOL                                      | 39.6 | -2.3  | 24.7  | -3.6 | 35.1  | 14.3  | 0.2    | 0.8  |
| alpha-DIHYDROGEDUNOL                         | 37.3 | 4.9   | 22.7  | -1.8 | 19.8  | 9.6   | -3.0   | 1.8  |
| DERRUSNIN                                    | 42.7 | 10.9  | 23.1  | -2.5 | 43.7  | 12.4  | -23.0  | 0.9  |
| 2-METHYL-5,7,8-TRIMETHOXYISOFLAVONE          | 28.2 | 4.1   | 17.9  | -1.9 | 44.4  | 29.5  | -14.1  | -0.6 |
| 5,7,4'-TRIMETHOXYFLAVONE                     | 42.0 | -7.1  | 8.1   | -0.4 | 30.1  | 11.2  | -94.0  | -1.9 |
| MUNDULONE                                    | 5.8  | 9.7   | 21.1  | 1.3  | 27.3  | 12.9  | -71.7  | -0.4 |
| 3,7-DIMETHOXYFLAVONE                         | 38.9 | -3.2  | 9.3   | -1.6 | 11.7  | -28.6 | -81.6  | 3.1  |
| OSAJIN                                       | 24.2 | 14.5  | 7.8   | -2.6 | -12.4 | 12.3  | -20.4  | -1.3 |
| METHYLBXANTHOXYLIN                           | 61.5 | 22.4  | 16.1  | -1.6 | 35.2  | 11.6  | -36.4  | -2.1 |
| BRAZILEIN                                    | 72.2 | 47.7  | 14.1  | -2.9 | 65.8  | 57.9  | -13.9  | -5.6 |
| IRIGENIN, 7-BENZYL ETHER                     | 51.9 | 24.1  | 18.1  | -1.3 | 35.3  | 14.5  | -15.3  | -2.5 |
| 7-DEACETYLBHIVORIN                           | 65.0 | 25.3  | 19.2  | -5.7 | 48.3  | 27.8  | -40.1  | -2.0 |
| DUARTIN (-)                                  | 45.5 | 24.9  | 36.2  | -4.7 | 42.8  | 23.1  | -13.6  | -1.6 |
| 8beta-HYDROXYCARAPIN, 3,8-HEMIACETAL         | 48.2 | 28.5  | 21.7  | -3.5 | 60.7  | 45.0  | -45.7  | -2.9 |
| PACHYRRHIZIN                                 | 32.8 | 1.8   | 16.2  | -3.8 | 27.2  | 9.8   | -8.0   | 0.7  |
| MEROGEDUNIN                                  | 40.6 | 5.6   | 23.6  | -5.3 | 37.6  | 27.7  | -1.0   | -1.2 |
| SOLIDAGENONE                                 | 27.4 | 0.0   | 31.1  | -0.7 | 38.6  | 10.8  | -22.8  | -0.1 |
| TOTAROL                                      | 49.7 | -1.4  | 42.2  | -2.1 | 27.7  | 28.2  | -22.6  | 0.0  |
| EPI(13)TORULOSOL                             | 52.2 | 13.3  | 8.4   | -1.3 | 21.3  | 12.7  | -7.6   | -1.7 |
| SALIDROSIDE                                  | 36.2 | -3.1  | 31.2  | 0.3  | 18.2  | 20.3  | 16.0   | -1.8 |
| 3,7-EPOXYCARYOPHYLLAN-6-ONE                  | 31.9 | -7.0  | 16.3  | -0.9 | 17.7  | -26.4 | -8.8   | 0.1  |
| 7,4'-DIHYDROXYFLAVONE                        | -9.1 | -11.3 | 16.6  | -1.5 | -23.1 | 16.3  | -18.7  | -1.5 |
| XANTHOPTERIN                                 | 75.9 | 51.5  | -3.5  | -4.8 | 37.1  | 18.3  | -27.6  | -3.7 |
| CRYPTOTANSHINONE                             | 77.4 | 62.5  | -13.2 | -1.9 | 27.5  | 44.1  | -121.8 | -3.0 |
| ACACETIN                                     | 58.2 | 38.8  | 11.0  | -2.7 | 42.7  | 24.9  | -80.3  | -3.6 |
| CARNOSINE                                    | 48.2 | 32.9  | 11.0  | -0.9 | 43.0  | 34.8  | -20.8  | -2.9 |
| GLUCOSAMINIC ACID                            | 62.7 | 25.2  | 24.3  | -2.6 | 49.7  | 20.9  | -26.2  | -6.1 |

|                                              |      |       |      |      |       |       |       |      |
|----------------------------------------------|------|-------|------|------|-------|-------|-------|------|
| PATULIN                                      | 45.9 | 25.4  | 23.7 | -2.7 | 60.1  | 41.7  | -18.3 | -4.0 |
| ANABASINE HYDROCHLORIDE                      | 47.8 | 9.6   | 26.5 | -1.8 | 31.0  | 11.5  | 0.3   | -0.7 |
| 7-DESHYDROXYPYROGALLIN-4-CARBOXYLIC ACID     | 44.7 | 16.2  | 22.9 | -2.7 | 32.1  | 19.2  | -0.5  | 0.5  |
| 2-HYDROXY-3,4-DIMETHOXYBENZOIC ACID          | 43.6 | 7.7   | 31.8 | -0.7 | 53.7  | 24.9  | -24.2 | -0.7 |
| QUERCETIN PENTAMETHYL ETHER                  | 50.0 | 9.5   | 6.3  | 2.7  | 40.0  | 17.6  | -5.6  | 0.9  |
| HEPTAMINOL HYDROCHLORIDE                     | 39.2 | 16.1  | 23.3 | -2.7 | 45.9  | 21.9  | 11.9  | -1.2 |
| DIHYDRODEOXYGEDUNIN                          | 59.3 | 7.5   | 10.0 | 0.0  | 27.5  | 14.4  | -17.8 | -0.9 |
| DERRUSTONE                                   | 23.9 | -3.8  | 25.7 | 18.4 | 10.4  | -22.3 | -28.8 | 0.8  |
| GRISEOFULVIC ACID                            | 45.6 | 12.5  | 3.0  | -3.8 | -9.6  | 19.0  | -19.2 | -2.0 |
| PHLORACETOPHENONE                            | 46.9 | 42.9  | 0.9  | 0.2  | 38.5  | 11.3  | -39.1 | -2.9 |
| BRAZILIN                                     | 78.6 | 66.2  | 17.5 | -5.3 | 60.2  | 56.0  | -7.9  | -4.5 |
| 4-METHYLDAPHNETIN                            | 42.4 | 30.6  | 16.5 | -3.9 | 41.8  | 20.0  | -29.0 | -4.5 |
| BISANHYDRORUTILANTINONE                      | 51.7 | 41.5  | 17.6 | -4.1 | 45.4  | 40.1  | -26.5 | -1.7 |
| ANHYDROBRAZILIC ACID                         | 36.9 | 6.5   | 21.5 | -2.0 | 53.8  | 26.3  | -4.3  | -3.4 |
| CARAPIN                                      | 43.2 | 16.0  | 17.7 | -4.2 | 45.7  | 34.1  | -15.7 | -1.5 |
| IRIDIN                                       | 27.7 | 0.9   | 18.5 | -2.2 | 31.4  | 10.3  | -3.6  | -1.1 |
| 1,7-DIDEACETOXY-1,7-DIOXO-3-DEACETYLKHIVORIN | 32.6 | 12.7  | 23.9 | -3.1 | 36.0  | 24.6  | -15.5 | 1.3  |
| IRIGENIN, DIBENZYL ETHER                     | -2.7 | -22.7 | 27.6 | -3.3 | 40.8  | 16.5  | -22.8 | 1.8  |
| 3,16-DIDEOXYMEXICANOLIDE-3beta-DIOL          | 20.0 | -9.7  | 17.8 | -2.5 | 36.4  | 26.9  | -23.7 | -0.7 |
| D-PERSEITOL                                  | 32.7 | -14.2 | 19.9 | -0.8 | 28.4  | 13.1  | -4.0  | 3.0  |
| ENTANDROPHRAGMIN                             | 22.5 | -11.1 | 17.1 | -1.9 | 22.4  | 21.6  | -8.2  | -1.5 |
| SPHONDIN                                     | 31.0 | -13.4 | 4.4  | -0.6 | 20.2  | -15.2 | -0.9  | 11.0 |
| FISSINOLIDE                                  | 43.1 | 8.3   | -1.8 | -2.3 | 6.5   | 39.1  | -22.5 | -2.4 |
| CADIN-4-EN-10-OL                             | 75.0 | 49.6  | 1.6  | -3.8 | 31.4  | 15.9  | -41.2 | -1.4 |
| N-METHYLBENZYLAMINE HYDROCHLORIDE            | 80.3 | 64.6  | -1.7 | -2.5 | 64.3  | 58.6  | -21.9 | -4.3 |
| CLOVANEDIOL DIACETATE                        | 51.6 | 39.6  | 12.7 | -2.4 | 46.0  | 11.6  | -24.9 | -1.9 |
| LOBELINE HYDROCHLORIDE                       | 47.1 | 27.6  | 18.8 | -3.4 | 43.4  | 31.2  | -34.0 | -2.8 |
| SANTONIN                                     | 54.8 | 30.4  | 13.3 | -4.9 | 49.9  | 27.2  | 1.2   | -2.9 |
| XANTHURENIC ACID                             | 40.9 | 5.9   | 22.4 | -1.5 | 49.8  | 38.2  | 0.6   | -5.0 |
| EPICATECHIN PENTAACETATE                     | 39.9 | 15.4  | 22.0 | -1.3 | 31.4  | 15.0  | 8.8   | 1.1  |
| GLUTAMINE (D)                                | 25.1 | 4.6   | 23.0 | -3.9 | 50.2  | 34.6  | -25.4 | -1.6 |
| RHODINYL ACETATE                             | 45.4 | 4.1   | 11.5 | -0.7 | 30.7  | 10.7  | 16.3  | 0.2  |
| ENOXOLONE                                    | 25.2 | 11.6  | 13.8 | -0.9 | 28.0  | 18.5  | -6.7  | -1.6 |
| ACONITIC ACID                                | 42.1 | 6.8   | 14.3 | 4.8  | 40.2  | 13.4  | -4.9  | 2.4  |
| 6-METHOXYHARMALAN                            | 25.9 | -0.1  | 25.3 | 4.7  | 17.2  | 16.6  | 4.1   | -0.4 |
| HAEMATOMMIC ACID                             | 24.0 | 4.2   | 27.6 | 16.2 | 13.3  | -9.7  | -13.6 | 2.2  |
| 3-METHOXYCATECHOL                            | 43.7 | 0.5   | 3.1  | -4.4 | -10.9 | 3.8   | -37.7 | -3.1 |
| 5alpha-CHOLESTAN-3beta-OL-6-ONE              | 66.8 | 52.7  | 4.7  | -5.3 | 35.7  | 11.7  | -20.9 | -4.7 |

|                                          |      |      |      |      |       |       |        |      |
|------------------------------------------|------|------|------|------|-------|-------|--------|------|
| CHOLESTAN-3-ONE                          | 58.9 | 46.9 | 9.1  | -3.2 | 51.6  | 44.2  | -24.6  | -4.0 |
| METHYL ROBUSTONE                         | 50.3 | 40.2 | 16.9 | -4.7 | 36.3  | 18.9  | 1.0    | -4.7 |
| 2,3,4'-TRIHYDROXY-4-METHOXYBENZOPHENONE  | 56.2 | 33.7 | 7.0  | -1.8 | 49.9  | 53.1  | -41.1  | -3.1 |
| CARNITINE (dl) HYDROCHLORIDE             | 37.6 | 5.5  | 22.5 | -0.3 | 54.8  | 36.1  | -20.2  | 0.5  |
| FUMARPROTOCETRARIC ACID                  | 71.0 | 35.9 | 23.5 | -1.7 | 59.8  | 53.9  | 4.5    | -0.8 |
| CHRYSLIN DIMETHYL ETHER                  | 30.8 | 14.2 | 5.8  | -0.8 | 24.2  | 10.7  | -35.0  | -2.7 |
| HAEMATOMIC ACID, ETHYL ESTER             | 38.5 | 18.2 | 16.3 | -0.5 | 38.0  | 30.3  | -20.7  | 0.8  |
| DEOXYSAPPANONE B 7,4'-DIMETHYL ETHER     | 33.2 | 8.7  | 14.1 | -0.8 | 49.4  | 25.8  | -34.0  | -1.7 |
| SHIKIMIC ACID                            | 42.6 | 17.0 | 6.0  | -1.3 | 46.8  | 37.4  | -18.5  | -1.2 |
| DALBERGIONE, 4-METHOXY-4'-HYDROXY-       | 39.4 | 1.9  | 18.0 | -1.8 | 33.6  | 13.4  | -20.4  | -2.6 |
| PICROTIN                                 | 53.1 | 10.8 | 25.7 | -1.6 | 27.9  | 18.0  | 0.7    | -1.3 |
| NONIC ACID                               | 19.8 | 3.0  | 26.8 | 1.6  | 13.5  | -12.4 | -5.8   | 3.4  |
| TOTAROL ACETATE                          | 41.9 | -1.3 | 2.8  | -1.2 | -13.3 | 25.0  | -22.4  | -2.2 |
| EPIAFZELECHIN (2R,3R)(-)                 | 74.5 | 54.3 | -0.4 | -3.5 | 55.4  | 41.8  | -46.3  | -1.6 |
| 1,3-DIDEACETYL-7-DEACETOXY-7-OXOKHIVORIN | 73.0 | 54.1 | 8.0  | -2.6 | 37.9  | 43.6  | -30.0  | -1.3 |
| EUPARIN                                  | 43.0 | 29.1 | 6.4  | -2.1 | 44.6  | 20.2  | -29.6  | -3.3 |
| DEOXYGEDUNIN                             | 48.3 | 27.1 | 18.0 | -3.0 | 43.1  | 37.6  | -16.2  | -1.0 |
| LARIXOL                                  | 38.8 | 27.6 | 18.4 | -0.8 | 46.9  | 32.3  | -46.8  | -2.1 |
| 3-DESHYDROXSAPPANOL TRIMETHYL ETHER      | 51.9 | 11.9 | 28.3 | -1.8 | 51.9  | 47.3  | -16.5  | -1.7 |
| 3-OXOURSAN (28-13)OLIDE                  | 43.8 | 14.9 | 12.2 | -2.2 | 35.1  | 22.4  | -52.9  | -2.6 |
| 4-O-METHYLPHLORACETOPHENONE              | 46.1 | 21.1 | 17.7 | -1.0 | 33.3  | 30.7  | -4.4   | 1.7  |
| PHLORIDZIN                               | 34.4 | 11.2 | 11.5 | 0.2  | 40.2  | 21.7  | -55.0  | -0.7 |
| RUBESCENSIN A                            | 22.8 | -1.9 | 8.4  | -1.2 | 41.1  | 35.9  | -102.8 | -1.7 |
| EPIGALLOCATECHIN                         | 33.0 | 5.1  | 28.0 | 0.0  | 37.3  | 17.3  | -20.5  | -2.7 |
| CADAVERINE TARTRATE                      | 34.6 | -1.9 | 29.5 | -0.4 | 28.9  | 31.7  | -7.6   | 1.2  |
| HELENINE                                 | 13.6 | -7.3 | 21.4 | 4.0  | 15.6  | -8.1  | -35.3  | -1.2 |
| TANSHINONE IIA                           | 52.1 | 22.9 | 0.4  | -3.4 | -5.2  | -1.6  | -18.1  | -2.6 |
| HESPERIDIN                               | 69.5 | 52.4 | -4.1 | -2.4 | 45.6  | 22.6  | -34.7  | -3.5 |
| ANDROSTERONE ACETATE                     | 75.4 | 59.5 | 0.8  | -3.0 | 41.9  | 40.4  | -30.3  | -0.5 |
| ISOPEONOL                                | 47.2 | 29.6 | 16.6 | -1.0 | 35.9  | 16.8  | -2.9   | -2.6 |
| MENAQUINONE-4                            | 51.4 | 37.9 | 15.9 | -2.4 | 36.8  | 34.2  | -16.0  | -1.7 |
| PERSITOL HEPTAACETATE                    | 43.1 | 8.4  | 16.0 | -1.4 | 46.2  | 29.8  | -10.5  | -1.6 |
| SPERMINE                                 | 50.6 | 23.7 | 21.3 | -4.8 | 45.3  | 32.4  | 0.3    | -3.7 |
| 7-DEACETOXY-7-OXOKHIVORIN                | 36.8 | 5.9  | 17.0 | -1.9 | 33.6  | 16.7  | 3.5    | -3.3 |
| KOPARIN                                  | 34.0 | 17.5 | 24.9 | -3.6 | 36.5  | 29.0  | -7.6   | -0.4 |
| QUERCETIN                                | 32.2 | 0.4  | 16.4 | 0.0  | 37.1  | 15.5  | -1.8   | -1.0 |
| GANGALEOIDIN                             | 47.0 | 33.3 | 29.2 | 9.2  | 48.6  | 47.6  | -5.2   | -0.6 |

|                                                 |       |       |       |       |       |       |       |      |
|-------------------------------------------------|-------|-------|-------|-------|-------|-------|-------|------|
| NARINGENIN                                      | 26.3  | -7.6  | 15.9  | -2.6  | 27.6  | 8.9   | 6.5   | -3.0 |
| LANOSTEROL ACETATE                              | 13.1  | -2.8  | 24.1  | -1.0  | 30.4  | 30.3  | -2.1  | -0.2 |
| XANTHONE                                        | 3.2   | 7.1   | 15.9  | 15.0  | 11.2  | -21.2 | -3.0  | 0.1  |
| PODOPHYLLIN ACETATE                             | 12.0  | 47.9  | -6.1  | -1.2  | 4.3   | 47.1  | -35.9 | -1.4 |
| ACACETIN DIACETATE                              | 77.1  | 58.0  | 2.3   | -3.9  | 36.7  | 16.8  | -57.0 | -2.9 |
| 3-DEOXO-3beta-HYDROXYMEXICANOLIDE 16-ENOL ETHER | 72.3  | 60.3  | -3.1  | -1.0  | 53.4  | 55.4  | -43.0 | -0.9 |
| DALBERGIONE                                     | 67.2  | 45.1  | 11.4  | -2.8  | 32.0  | 9.8   | -3.2  | -1.9 |
| HYDROLYSIS PRODUCT OF BUSSEIN                   | 63.2  | 49.7  | 13.5  | -2.2  | 41.6  | 42.5  | -25.2 | -1.6 |
| EVERNINIC ACID                                  | 52.8  | 21.3  | 20.2  | 2.9   | 55.2  | 27.3  | -9.9  | -2.3 |
| 3beta-ACETOXYDEOXODIHYDROGEDUNIN                | 61.8  | 38.1  | 14.4  | -1.9  | 44.6  | 35.3  | -13.2 | -1.6 |
| STICTIC ACID                                    | 49.7  | 31.9  | 14.8  | -1.5  | 29.6  | 11.8  | -16.7 | -3.0 |
| DEOXYKHIVORIN                                   | 34.5  | 23.0  | 18.1  | -1.9  | 32.5  | 28.0  | -10.2 | 0.4  |
| LARIXOL ACETATE                                 | 29.9  | -3.2  | 12.1  | 11.5  | 28.0  | -4.3  | 3.4   | -3.6 |
| beta-ESCIN                                      | 23.3  | -2.1  | 26.0  | -4.2  | 34.5  | 28.7  | -9.2  | -1.3 |
| DEHYDROABIETAMIDE                               | 31.5  | 0.1   | 12.5  | -0.6  | 24.5  | 0.6   | -39.7 | -3.7 |
| ARCAINE SULFATE                                 | 30.4  | -0.6  | 22.5  | 2.5   | 26.7  | 33.6  | 12.9  | -0.5 |
| GEDUNOL                                         | 7.2   | 3.6   | 24.9  | 14.0  | 4.3   | -29.2 | 8.3   | -1.2 |
| FERULIC ACID                                    | -36.8 | 31.4  | -1.2  | -2.6  | -18.8 | 4.5   | -21.5 | -1.6 |
| CATECHIN PENTAACETATE                           | 65.2  | 65.9  | 2.7   | -4.4  | 32.0  | 13.6  | -38.2 | -1.0 |
| ELLAGIC ACID                                    | 40.9  | 41.5  | 11.0  | -1.5  | 48.8  | 51.7  | -37.2 | -1.4 |
| HESPERETIN                                      | 25.2  | 33.0  | 1.1   | -2.4  | 34.0  | 12.9  | -18.8 | 0.1  |
| PEONIFLORIN                                     | 49.7  | 35.8  | 17.2  | -2.2  | 36.2  | 38.5  | -45.7 | -0.4 |
| LARIXINIC ACID                                  | 48.7  | 34.9  | 3.4   | -3.4  | 39.4  | 20.6  | -8.7  | -3.0 |
| alpha-HYDROXYDEOXYCHOLIC ACID                   | 38.0  | 20.4  | -8.6  | -3.0  | -18.7 | 5.3   | -20.9 | 4.0  |
| N-METHYLISOLEUCINE                              | 36.5  | 9.0   | -0.9  | -0.4  | 36.8  | -7.0  | -54.5 | -9.1 |
| GRAMINE                                         | 51.5  | 22.4  | -4.6  | -8.0  | 34.7  | 20.3  | -50.7 | -4.9 |
| 3,4-DIDESMETHYL-5-DESHYDROXY-3'-ETHOXYSCLEROIN  | 17.8  | -7.4  | 9.6   | 2.6   | 39.4  | -2.1  | 6.3   | -7.4 |
| HETEROPEUCENIN, METHYL ETHER                    | 43.4  | 19.4  | -7.2  | -11.2 | 40.2  | 19.6  | -43.7 | -3.6 |
| DESACETYL (7)KHIVORINIC ACID, METHYL ESTER      | 39.2  | 0.5   | -4.6  | 0.0   | 55.4  | 6.0   | -51.7 | -7.8 |
| 2,3-DIHYDROXY-4-METHOXY-4'-ETHOXYBENZOPHENONE   | 54.5  | 19.4  | -16.0 | -11.3 | 51.4  | 27.1  | -40.7 | -2.5 |
| gamma-AMINOBUTYRIC ACID                         | 24.4  | -18.2 | 14.5  | 5.9   | 30.3  | -10.2 | -2.8  | -6.8 |
| LECANORIC ACID                                  | 36.3  | 6.2   | 7.9   | -11.6 | 28.7  | 13.9  | 17.5  | -0.4 |
| QUERCITRIN                                      | 30.7  | -20.8 | -15.7 | 7.6   | 40.8  | 2.6   | -84.9 | -7.8 |
| 7-AMINOCEPHALOSPORANIC ACID                     | 36.2  | -10.7 | -4.5  | -1.6  | 49.7  | 15.6  | -28.4 | -8.8 |
| 3-METHYLORSELLINIC ACID                         | 26.3  | -33.7 | 10.9  | 17.7  | 31.2  | -2.0  | -15.5 | -9.2 |
| DIFUCOL HEXAMETHYL ETHER                        | 24.5  | -13.4 | -2.5  | 9.3   | 30.5  | 10.2  | -9.7  | -9.0 |

|                                       |       |       |       |       |       |       |       |      |
|---------------------------------------|-------|-------|-------|-------|-------|-------|-------|------|
| APIGENIN                              | -17.0 | -31.8 | 1.7   | -3.5  | -6.0  | -11.8 | -24.8 | 2.1  |
| EPOXYGEDUNIN                          | 26.5  | 7.0   | -1.1  | -3.5  | 2.7   | 1.3   | -25.1 | -7.0 |
| 2'-METHOXYFORMONETIN                  | 73.3  | 38.4  | 0.9   | -9.6  | 49.0  | 35.7  | -64.0 | -4.8 |
| OLEANOIC ACID                         | 48.7  | 28.6  | -12.1 | -9.8  | 52.8  | 46.5  | -97.1 | -7.5 |
| EPIAFZELECHIN TRIMETHYL ETHER         | 71.2  | 38.5  | 7.7   | -11.2 | 50.1  | 34.2  | -29.0 | -5.8 |
| 3beta-HYDROXYISOALLOSPIROST-9(11)-ENE | 45.8  | 26.8  | 2.0   | -9.5  | 40.8  | 29.3  | -43.9 | -1.0 |
| AGELASINE                             | 100.7 | 97.4  | 100.3 | 96.4  | 55.8  | 28.7  | -51.4 | -7.4 |
| SMILAGENIN ACETATE                    | 34.8  | -11.2 | -3.1  | -10.1 | 53.0  | 31.6  | -20.5 | -2.8 |
| VULPINIC ACID                         | 55.1  | 21.7  | 10.8  | -11.3 | 34.3  | 19.2  | 11.4  | -7.9 |
| 6,4'-DIMETHOXYFLAVONE                 | 40.7  | -0.3  | 10.2  | -9.9  | 30.8  | 21.1  | -11.8 | -6.5 |
| MUUROLLADIE-3-ONE                     | 54.6  | -2.5  | -2.0  | -6.3  | 52.1  | 19.0  | -25.3 | -2.4 |
| 3,4-DIHYDROXYCARANE                   | 28.1  | -0.7  | 1.1   | -10.5 | 58.4  | 32.3  | -25.0 | -4.5 |
| CHRYSANTHEMYL ALCOHOL                 | 48.9  | 7.8   | 3.6   | -5.4  | 48.2  | 14.5  | -33.7 | -2.2 |
| GOSSYPOL                              | 46.3  | 10.5  | 23.7  | -5.4  | 48.4  | 21.3  | -24.0 | 9.7  |
| EPIGALLOCATECHIN 3,5-DIGALLATE        | 50.4  | 29.6  | -32.7 | -9.9  | -12.7 | -6.1  | -35.8 | -8.6 |
| CAMPTOTHECIN                          | 16.7  | -1.9  | 7.1   | 0.7   | 25.6  | 11.4  | -9.9  | -7.2 |
| EPIANDROSTERONE                       | 35.8  | 8.1   | 3.8   | -4.0  | 51.5  | 38.9  | -53.5 | -7.8 |
| 7-DESACETOXY-6,7-DEHYDROGEDUNIN       | 52.1  | 45.6  | 1.9   | -6.5  | 55.9  | 42.8  | -35.8 | -7.5 |
| QUINIC ACID                           | 44.3  | 13.1  | 9.9   | -6.9  | 47.1  | 36.5  | -31.2 | -4.8 |
| BIOCHANIN A                           | 41.8  | 37.7  | 0.9   | 3.0   | 56.1  | 44.0  | -35.2 | -4.8 |
| CREATININE                            | 42.9  | -25.8 | 2.8   | -5.9  | 61.3  | 35.0  | -39.1 | -6.0 |
| ESEROLINE FUMARATE                    | 52.2  | 23.0  | 0.8   | -8.1  | 60.6  | 37.8  | -29.3 | -6.0 |
| PIPERONYLIC ACID                      | 37.1  | 2.0   | 18.7  | 10.8  | 37.2  | 18.3  | 7.5   | -4.6 |
| PECTOLINARIN                          | 39.3  | 20.9  | 13.7  | -6.0  | 43.5  | 27.7  | 9.7   | -5.8 |
| FRAXIDIN METHYL ETHER                 | 37.6  | -0.9  | -8.2  | -10.1 | 67.4  | 33.4  | -34.1 | -5.6 |
| OBTUSAQUINONE                         | 49.6  | 13.3  | -6.3  | -11.7 | 50.0  | 28.3  | -32.4 | -4.8 |
| MELATONIN                             | 36.9  | 6.7   | 7.5   | 5.2   | 64.6  | 25.0  | -11.6 | 0.1  |
| GITOXIGENIN DIACETATE                 | 29.3  | -2.7  | 3.7   | -1.2  | 41.3  | 15.1  | -18.3 | 6.7  |
| KINETIN                               | 19.0  | -20.2 | 11.8  | 14.6  | -20.6 | 6.5   | 8.8   | -6.2 |
| GARCINOLIC ACID                       | 33.1  | 3.1   | -1.4  | -7.6  | 10.9  | 0.3   | -21.2 | 11.0 |
| 2-BENZOYL-5-METHOXYBENZOQUINONE       | 56.3  | 25.4  | -0.8  | -10.3 | 54.5  | 39.5  | -41.4 | -9.5 |
| ANTHOTHECOL                           | 65.2  | 47.4  | 4.6   | -11.1 | 51.2  | 41.1  | -28.3 | -2.2 |
| DEOXSAPPANONE B 7,3'-DIMETHYL ETHER   | 59.0  | 26.2  | -8.5  | -4.5  | 59.2  | 39.9  | -36.2 | -7.7 |
| PRENYLETIN                            | 38.5  | 13.1  | 0.8   | -10.7 | 44.1  | 33.5  | -15.6 | -4.8 |
| DEOXSAPPANONE B TRIMETHYL ETHER       | 54.0  | 6.1   | -3.6  | -13.2 | 65.3  | 27.2  | -45.1 | -8.3 |
| LUNARINE                              | 45.7  | 5.9   | -2.7  | -9.1  | 59.5  | 39.4  | -32.6 | -8.6 |
| GENISTEIN                             | 37.9  | 12.5  | 7.2   | -7.3  | 38.4  | 16.9  | 16.1  | -3.0 |
| DIPTERYXIN                            | 35.8  | -0.8  | 18.4  | 3.9   | 38.2  | 30.0  | 10.4  | -9.0 |
| ISOPIMPINELLIN                        | 45.0  | -6.3  | -10.0 | -6.4  | 64.2  | 38.8  | -22.8 | -6.2 |
| DEACETOXY-7-OXOGEDUNIN                | 31.5  | -2.8  | -3.6  | -12.4 | 61.6  | 39.8  | -36.4 | -0.1 |

|                                                    |      |       |      |       |      |      |       |       |
|----------------------------------------------------|------|-------|------|-------|------|------|-------|-------|
| 3-NOR-3-OXOPANASINSAN-6-OL                         | 41.7 | 4.7   | -2.1 | -10.3 | 50.7 | 29.9 | -14.1 | -8.9  |
| CARNOSIC ACID                                      | 24.5 | -1.6  | 5.3  | 4.3   | 43.6 | 6.3  | -47.6 | -8.7  |
| 3-PINANONE OXIME                                   | 17.3 | -27.3 | 5.6  | -2.3  | 4.8  | -0.9 | -3.0  | -5.6  |
| MUNDULONE ACETATE                                  | 1.3  | 0.9   | 7.7  | 2.7   | 11.4 | 6.3  | -10.7 | 4.4   |
| MENTHONE                                           | 64.9 | 40.8  | 4.3  | -10.6 | 59.8 | 40.9 | -59.6 | -7.2  |
| BERBERINE CHLORIDE                                 | 53.5 | 36.9  | 5.9  | -8.7  | 60.5 | 53.7 | -37.6 | -6.5  |
| EPICATECHIN                                        | 50.9 | 29.5  | 10.0 | -13.2 | 55.2 | 42.3 | -30.0 | -9.3  |
| BAICALEIN                                          | 51.2 | 23.7  | 1.4  | -6.8  | 52.9 | 43.1 | -44.9 | -6.7  |
| DJENKOLIC ACID                                     | 53.2 | 16.5  | 3.3  | -12.8 | 61.6 | 31.7 | -27.6 | -7.8  |
| HARMINE                                            | 53.2 | 21.9  | 3.4  | -7.6  | 50.0 | 35.8 | -18.3 | -7.1  |
| QUASSIN                                            | 44.5 | 10.0  | 16.0 | -9.6  | 46.9 | 20.9 | -6.7  | -7.9  |
| METHYL DEOXYCHOLATE                                | 39.6 | 6.7   | 19.5 | -1.3  | 29.9 | 21.9 | -46.0 | -6.8  |
| MEVASTATIN                                         | 46.1 | -4.4  | -8.8 | 4.8   | 64.8 | 27.7 | -20.3 | -8.4  |
| GEDUNIN                                            | 27.2 | 6.4   | -6.4 | -9.9  | 47.5 | 20.1 | -6.6  | -5.0  |
| PHENACYLAMINE HYDROCHLORIDE                        | 46.3 | 9.8   | 8.8  | 7.7   | 56.0 | 16.1 | -19.8 | -7.4  |
| ISOTECTORIGENIN, 7-METHYL ETHER                    | 26.4 | -4.3  | 10.9 | -6.4  | 42.8 | 5.6  | 7.0   | -6.1  |
| DIHYDROXY (3 $\alpha$ ,12 $\alpha$ )PREGNAN-20-ONE | 45.0 | -4.8  | 3.7  | -9.8  | 9.7  | -3.9 | -11.6 | -6.4  |
| PISCIDIC ACID                                      | 37.3 | 1.6   | 16.1 | -5.3  | 5.4  | 21.7 | -9.0  | 9.5   |
| CITROPTEN                                          | 48.1 | 12.1  | 3.5  | -12.6 | 35.5 | 25.3 | -29.9 | -4.9  |
| 2-METHYL GRAMINE                                   | 62.8 | 48.2  | -1.9 | -10.4 | 57.1 | 54.7 | -46.5 | -6.8  |
| NARINGIN                                           | 50.5 | 21.7  | 1.3  | -6.2  | 51.9 | 31.9 | -38.6 | -6.9  |
| GALLIC ACID                                        | 50.9 | 25.7  | 13.8 | -11.1 | 46.3 | 40.9 | -20.3 | -6.0  |
| ERGOSTEROL                                         | 55.1 | 16.0  | 4.4  | -14.2 | 55.0 | 28.6 | -42.0 | -8.7  |
| CEDRELONE                                          | 54.1 | 25.6  | 37.3 | -12.2 | 52.7 | 31.8 | -20.4 | -7.1  |
| IRIGENIN TRIMETHYL ETHER                           | 45.0 | 20.1  | 11.7 | -11.0 | 43.6 | 18.8 | 27.2  | -1.6  |
| MEXICANOLIDE                                       | 42.3 | 12.2  | 14.3 | -3.5  | 41.0 | 31.9 | 10.4  | -7.3  |
| DEOXSAPPANONE B 7,3'-DIMETHYL ETHER ACETATE        | 45.2 | -7.8  | 0.1  | -9.0  | 55.8 | 21.2 | -9.1  | -0.7  |
| FRIEDELIN                                          | 47.8 | 2.4   | 2.7  | -12.5 | 49.8 | 31.6 | -21.7 | -9.0  |
| ISOOSAJIN                                          | 41.2 | 4.5   | 9.8  | -1.8  | 51.5 | 9.9  | -13.6 | -7.6  |
| PODOTOTARIN                                        | 41.1 | 5.0   | 14.8 | -0.3  | 39.8 | 16.9 | -20.6 | -3.6  |
| ISOBERGAPTENE                                      | 19.2 | -15.4 | 5.3  | -2.2  | 35.4 | -3.2 | 2.4   | -4.5  |
| KHIVORIN                                           | 45.8 | 7.3   | 12.5 | -12.7 | 49.3 | 27.4 | -29.0 | -8.1  |
| 2-METHOXY-5 (6)EPOXY-TETRAHYDROCARYOPHYLLENE       | 44.3 | -1.1  | 12.1 | 0.8   | 1.7  | 22.9 | -22.2 | -8.2  |
| BOVINOCIDIN (3-nitropropionic acid)                | 55.4 | 31.1  | 10.0 | -13.0 | 55.9 | 39.1 | -53.8 | -10.1 |
| MELEZITOSE                                         | 74.6 | 60.3  | -3.8 | -12.6 | 60.1 | 53.5 | -34.7 | -7.4  |
| AJMALINE                                           | 66.7 | 52.7  | 8.8  | -11.6 | 48.1 | 40.1 | -28.8 | -6.5  |
| CHRYSAROBIN                                        | 56.2 | 8.9   | 2.3  | -11.7 | 58.6 | 26.6 | -37.6 | -8.5  |

|                                                       |      |       |       |       |      |       |       |      |
|-------------------------------------------------------|------|-------|-------|-------|------|-------|-------|------|
| AGMATINE SULFATE                                      | 70.3 | 44.0  | 10.2  | -10.8 | 53.0 | 36.6  | -24.5 | -7.6 |
| EPIGALLOCATECHIN-3-MONOGALLATE                        | 27.5 | 14.3  | -2.1  | -9.4  | 61.3 | 38.9  | -24.6 | -7.8 |
| BERGENIN                                              | 48.4 | 15.2  | 8.3   | -9.3  | 42.6 | 32.1  | 6.3   | -7.1 |
| CEDRYL ACETATE                                        | 48.8 | 3.9   | -2.5  | -9.1  | 50.1 | 24.9  | -26.0 | -9.2 |
| CARAPIN-8(9)-ENE                                      | 46.8 | 4.1   | 0.1   | -6.1  | 45.0 | 31.3  | -16.4 | -6.2 |
| APIIN                                                 | 33.7 | -5.1  | 12.1  | -6.0  | 41.6 | 14.6  | -29.2 | -7.7 |
| JUGLONE                                               | 44.4 | 3.9   | 13.4  | -6.9  | 35.1 | 25.9  | -19.8 | -6.6 |
| N-METHYLANTHRANILIC ACID                              | 14.9 | -16.1 | 6.8   | -4.7  | 19.8 | -17.1 | -3.3  | 3.8  |
| 3alpha-HYDROXY-4,4-BISNOR-8,11,13-<br>PODOCARPATRIENE | 43.1 | 17.2  | 2.1   | -12.8 | 21.7 | 13.1  | -26.6 | -5.9 |
| CYCLOVERATRYLENE                                      | 76.1 | 43.7  | -12.6 | -12.5 | 33.6 | 17.7  | -37.9 | -7.2 |
| 2',4'-DIHYDROXYCHALCONE 4'-GLUCOSIDE                  | 73.1 | 58.9  | 10.2  | -11.0 | 54.5 | 49.6  | -42.2 | -7.4 |
| LEOIDIN                                               | 83.6 | 69.2  | 32.5  | -10.3 | 62.2 | 55.9  | -11.6 | -6.0 |
| ANTIAROL                                              | 54.2 | 44.2  | 6.9   | -11.8 | 53.8 | 45.3  | -27.5 | -8.9 |
| 6,4'-DIHYDROXYFLAVONE                                 | 56.1 | 11.2  | 8.7   | -11.6 | 50.5 | 23.3  | -28.6 | 2.1  |
| XANTHYLETIN                                           | 57.1 | 33.2  | -1.3  | -6.2  | 52.1 | 34.5  | -60.9 | -7.2 |
| CANTHARIDIN                                           | 46.3 | 1.2   | 15.4  | -11.9 | 41.5 | 28.9  | 14.6  | -2.9 |
| BUSSEIN                                               | 34.1 | 20.0  | 17.3  | -4.0  | 31.8 | 27.5  | 2.1   | -5.0 |
| ERGOSTEROL ACETATE                                    | 36.3 | -5.4  | -0.3  | -8.5  | 37.5 | 13.0  | -9.5  | -5.8 |
| ALLOPREGNANOLONE                                      | 47.3 | 8.8   | 16.4  | -9.1  | 56.7 | 42.6  | -27.3 | -7.7 |
| SAPPANONE A DIMETHYL ETHER                            | 39.6 | -3.6  | 16.6  | -6.9  | 38.5 | 12.1  | -6.0  | -8.6 |
| TIGOGENIN                                             | 34.1 | -0.7  | 12.5  | 10.7  | 43.8 | 27.5  | -36.1 | -6.5 |
| DUARTIN, DIMETHYL ETHER                               | 45.7 | -8.1  | 11.1  | -11.5 | 15.5 | -16.5 | 9.4   | -7.0 |
| 3-DEOXY-3beta-HYDROXYANGOLENSIC ACID<br>METHYL ESTER  | 8.7  | 21.6  | 11.4  | -4.6  | 10.2 | 6.5   | -2.2  | 2.5  |
| APOTOXICAROL                                          | 68.8 | 40.4  | 1.1   | -13.3 | 48.6 | 38.2  | -29.4 | -8.7 |
| beta-AMYRIN                                           | 69.9 | 48.6  | 9.1   | -11.3 | 60.3 | 55.9  | -36.6 | -8.4 |
| GIBBERELIC ACID                                       | 48.0 | 17.3  | 4.9   | -11.7 | 46.0 | 38.5  | -17.9 | -5.5 |
| ORNITHINE                                             | 69.3 | 44.4  | 3.9   | -13.5 | 47.2 | 46.2  | -29.5 | -8.4 |
| ISOKOBUSONE                                           | 58.3 | 21.8  | 3.5   | -11.1 | 54.3 | 26.9  | -29.7 | -7.0 |
| CHRY SIN                                              | 60.4 | 42.2  | -8.7  | -13.2 | 45.0 | 33.7  | -42.7 | -8.0 |
| ARBUTIN                                               | 43.0 | 2.0   | 16.9  | -7.7  | 36.7 | 22.8  | 13.6  | -7.3 |
| DIOSMIN                                               | 51.3 | 31.0  | 7.5   | -7.1  | 46.4 | 34.4  | -10.5 | -7.6 |
| PELLETIERINE HYDROCHLORIDE                            | 38.8 | -15.3 | 18.2  | -5.7  | 52.6 | 19.6  | -28.9 | -6.1 |
| SALINOMYCIN, SODIUM                                   | 98.8 | 95.0  | 77.8  | 30.4  | 84.2 | 81.9  | 50.0  | -7.9 |
| 2',2'-BISEPIGALLOCATECHIN DIGALLATE                   | 54.6 | 13.2  | 6.7   | -10.1 | 56.2 | 23.2  | -24.4 | -6.4 |
| LITHOCHOLIC ACID                                      | 42.6 | 49.2  | -23.9 | -6.3  | 10.7 | 22.5  | 5.9   | -5.6 |
| HYPOXANTHINE                                          | 34.8 | -24.0 | 12.3  | -6.6  | 20.3 | -9.2  | 13.4  | -5.6 |
| OROTIC ACID                                           | 4.5  | 27.4  | 10.3  | -12.5 | 16.5 | 11.1  | -1.5  | -0.3 |
| BIXIN                                                 | 72.7 | 36.8  | 8.8   | -12.0 | 43.7 | 35.8  | -28.4 | -9.0 |

|                                                         |      |       |      |       |      |       |        |      |
|---------------------------------------------------------|------|-------|------|-------|------|-------|--------|------|
| STIGMASTEROL                                            | 67.8 | 48.6  | -1.0 | -11.5 | 53.2 | 49.4  | -31.0  | -7.9 |
| TETRAHYDROSAPPANONE A TRIMETHYL<br>ETHER                | 57.2 | 21.7  | 5.4  | -16.1 | 44.8 | 34.0  | -40.2  | -9.1 |
| STROPHANTHIDIN                                          | 64.9 | 38.0  | 3.0  | -13.7 | 40.9 | 43.5  | -11.1  | -9.2 |
| d,l-threo-3-HYDROXYASPARTIC ACID                        | 61.2 | 23.2  | -0.1 | 2.9   | 49.4 | 24.3  | -37.9  | -9.0 |
| 12a-HYDROXY-9-DEMETHYLMUNDUSERONE-<br>8-CARBOXYLIC ACID | 60.5 | 37.5  | 5.7  | -6.5  | 43.3 | 34.8  | -39.5  | -8.3 |
| USNIC ACID                                              | 55.6 | 18.3  | 15.8 | -7.7  | 41.9 | 22.7  | 2.9    | -7.4 |
| THEAFLAVIN                                              | 39.9 | 19.7  | 17.6 | -11.6 | 38.8 | 36.2  | -6.5   | -8.1 |
| 7,2'-DIHYDROXYFLAVONE                                   | 45.6 | -4.2  | 0.5  | -0.4  | 40.4 | 18.6  | -39.0  | -6.5 |
| CHUKRASIN METHYL ETHER                                  | 43.8 | -9.6  | -2.3 | -9.4  | 34.3 | 33.2  | -61.0  | -6.6 |
| BETULIN                                                 | 30.3 | 3.7   | -6.7 | 1.8   | 40.4 | 17.1  | -102.8 | -7.3 |
| GLUTATHIONE                                             | 42.8 | 15.3  | 5.6  | -0.9  | 36.9 | 25.2  | -38.4  | -2.5 |
| NORSTICTIC ACID PENTAACETATE                            | 24.9 | -13.8 | 18.6 | 11.9  | 22.9 | -0.4  | 10.6   | -2.6 |
| DEACETYLGEDUNIN                                         | 47.8 | 44.6  | 9.6  | -9.9  | 3.0  | 4.0   | -3.2   | -0.8 |
| VIOLASTYRENE                                            | 54.3 | 20.1  | 13.7 | -8.7  | 46.6 | 43.2  | -28.0  | -9.2 |
| PTAEROXYLIN                                             | 54.1 | 40.3  | 10.3 | -11.9 | 50.2 | 47.0  | -37.3  | -8.5 |
| 4,4'-DIMETHOXYDALBERGIONE                               | 58.3 | 18.7  | 3.4  | -12.6 | 46.6 | 39.3  | -28.9  | -5.6 |
| UTILIN                                                  | 50.8 | 23.3  | 25.4 | -10.4 | 48.8 | 43.3  | -12.3  | -8.2 |
| SITOSTERYL ACETATE                                      | 35.5 | -10.8 | 6.7  | -7.0  | 48.7 | 33.9  | -31.4  | -8.8 |
| 8-HYDROXYCARAPINIC ACID                                 | 48.2 | 21.5  | 20.2 | -0.7  | 43.7 | 41.8  | -17.7  | -8.3 |
| PIMPINELLIN                                             | 48.4 | 22.7  | 8.6  | -9.0  | 35.2 | 27.4  | 16.5   | -5.9 |
| LUPEOL                                                  | 36.5 | 3.7   | 22.9 | -8.7  | 38.0 | 39.4  | 7.5    | -4.6 |
| 3,7-EPOXYCARYOPHYLLAN-6-OL                              | 41.2 | -4.0  | -0.6 | 17.7  | 48.4 | 25.8  | -23.9  | -5.4 |
| BENZYL ISOTHIOCYANATE                                   | 37.3 | -4.5  | 15.7 | 17.0  | 45.7 | 37.7  | -9.4   | -7.0 |
| ISOSAFROLE                                              | 49.4 | 1.2   | 3.2  | 1.1   | 38.6 | 15.5  | 31.2   | -7.2 |
| HECOGENIN                                               | 34.1 | 6.9   | 28.0 | 11.8  | 43.2 | 27.3  | 5.0    | -5.9 |
| PHLORETIN                                               | 14.3 | -21.3 | 8.3  | 6.9   | 5.3  | -30.3 | -55.5  | -4.8 |
| KASUGAMYCIN HYDROCHLORIDE                               | 26.0 | 6.0   | 17.5 | -9.1  | -0.7 | 31.9  | 5.0    | 0.6  |
| EPICATECHIN MONOGALLATE                                 | 30.2 | 0.4   | 14.6 | -10.5 | 65.8 | 52.9  | -50.7  | -9.0 |
| AESCULIN                                                | 56.5 | 39.0  | 11.9 | -10.9 | 51.1 | 54.0  | -24.6  | -7.3 |
| PHYTOL                                                  | 44.9 | 12.1  | 22.4 | -11.4 | 46.8 | 34.0  | -24.1  | -5.5 |
| ANISODAMINE HYDROBROMIDE                                | 56.3 | 32.4  | 13.2 | -11.9 | 46.8 | 44.8  | -19.8  | -6.2 |
| JUAREZIC ACID                                           | 44.1 | 20.1  | -1.5 | -11.2 | 46.8 | 28.2  | -30.6  | -8.0 |
| LACTOBIONIC ACID                                        | 43.5 | 12.0  | 13.5 | -11.1 | 52.4 | 46.1  | -28.3  | 7.1  |
| ACETOSYRINGONE                                          | 27.0 | 3.9   | 22.1 | -9.3  | 38.1 | 33.4  | 10.0   | -5.8 |
| DIOSGENIN                                               | 23.7 | -2.0  | 21.1 | -7.1  | 37.9 | 41.8  | 10.9   | -2.3 |
| APIOLE                                                  | 44.5 | 19.0  | 12.0 | -4.1  | 43.9 | 32.4  | -25.3  | -6.3 |
| ASARYLALDEHYDE                                          | 38.2 | 7.0   | 18.4 | -11.5 | 54.7 | 43.5  | -27.3  | 15.9 |
| CEDROL                                                  | 25.7 | -2.4  | 15.9 | 2.9   | 36.4 | 21.6  | -20.9  | -5.5 |

|                                 |      |       |       |       |      |       |       |       |
|---------------------------------|------|-------|-------|-------|------|-------|-------|-------|
| HAEMATOKSYLIN                   | 33.2 | 2.8   | 13.6  | -4.1  | 39.3 | 44.1  | -1.1  | -4.0  |
| 4-METHYLESCULETIN               | 10.1 | -8.3  | 14.7  | -5.1  | 19.0 | -5.7  | 7.7   | -5.4  |
| ANGOLENSIN (R)                  | 21.8 | 5.1   | 8.1   | -11.4 | 13.7 | 12.8  | 4.5   | -5.7  |
| CARMINIC ACID                   | 58.8 | 23.8  | 6.0   | -12.1 | 48.3 | 46.1  | -41.2 | -8.1  |
| BICUCULLINE (+)                 | 48.9 | 34.7  | 8.9   | -12.8 | 50.6 | 56.5  | -38.6 | -9.3  |
| PIPERIC ACID                    | 56.3 | 25.3  | 14.5  | -11.8 | 46.9 | 39.4  | -18.3 | -6.9  |
| BILIRUBIN                       | 53.6 | 27.1  | 14.9  | -13.6 | 44.0 | 45.6  | -34.8 | -7.6  |
| ANDROSTA-1,4-DIEN-3,17-DIONE    | 49.9 | 16.2  | 13.9  | 1.2   | 52.9 | 37.5  | -3.9  | -8.2  |
| KYNURENINE                      | 52.4 | 22.6  | 8.3   | -12.3 | 51.9 | 47.3  | -50.7 | -8.8  |
| UMBELLIFERONE                   | 38.9 | -1.3  | 21.5  | -11.2 | 39.2 | 35.5  | 6.3   | -6.1  |
| PRIMULETIN                      | 33.1 | 4.9   | 15.6  | -10.8 | 32.2 | 37.2  | 7.0   | -7.4  |
| GARDENIN B                      | 49.7 | 17.8  | 9.9   | 0.5   | 51.1 | 27.4  | -28.4 | -6.9  |
| DEOXYADENOSINE                  | 33.0 | 5.5   | 16.5  | -8.2  | 55.6 | 50.4  | -5.2  | -5.2  |
| ONONETIN                        | 35.1 | 17.8  | 21.2  | 6.7   | 38.4 | 20.8  | -4.2  | -5.4  |
| RAUWOLSCINE HYDROCHLORIDE       | 30.1 | 7.5   | 13.9  | -6.3  | 38.2 | 34.3  | -26.6 | -5.4  |
| HAEMATOKSYLIN PENTAACETATE      | 19.4 | -3.1  | 22.1  | -1.0  | 17.0 | -2.4  | 16.0  | -4.9  |
| CONESSINE                       | 26.9 | 10.4  | 12.7  | -8.5  | 15.1 | 18.0  | -0.6  | 10.0  |
| ACETYL ISOGAMBOGIC ACID         | 74.5 | 43.9  | 26.8  | -13.5 | 50.6 | 34.1  | -16.1 | -8.8  |
| RESVERATROL 4'-METHYL ETHER     | 54.6 | 46.3  | 5.2   | -9.0  | 51.6 | 53.2  | -41.4 | -6.5  |
| CYTIDINE                        | 42.8 | 11.1  | 17.3  | -13.8 | 51.9 | 38.3  | -33.8 | -5.5  |
| BETULINIC ACID                  | 52.9 | 40.7  | 1.1   | -10.5 | 34.7 | 50.7  | -96.0 | -9.1  |
| beta-AMYRIN ACETATE             | 46.8 | 9.3   | 15.9  | -12.1 | 57.0 | 38.2  | -41.3 | -8.3  |
| URSINOIC ACID                   | 54.0 | 28.9  | 12.2  | -7.3  | 51.3 | 43.7  | -29.4 | -7.0  |
| 4-ACETOXYPHENOL                 | 41.4 | 2.7   | 20.2  | -9.7  | 41.5 | 17.2  | 8.9   | -7.2  |
| CHRYSANTHEMIC ACID              | 38.5 | 11.2  | 17.8  | 2.9   | 37.9 | 41.3  | -30.8 | -5.9  |
| ATRANORIN                       | 36.5 | -4.3  | 16.9  | -10.8 | 57.8 | 37.9  | -36.5 | -6.2  |
| GOSSYPIN                        | 47.3 | 19.3  | 14.0  | -5.8  | 46.2 | 42.3  | -26.8 | -4.8  |
| MYOSMINE                        | 34.4 | -5.9  | 26.0  | -4.9  | 42.2 | 9.1   | 11.0  | -5.9  |
| HARPAGOSIDE                     | 20.7 | 11.8  | 17.3  | 22.9  | 41.4 | 26.6  | -4.3  | -5.1  |
| ESTRADIOL METHYL ETHER          | 18.7 | -23.6 | 19.8  | -8.2  | 22.1 | -15.5 | -26.5 | -3.9  |
| AVOCADYNE                       | 21.5 | -1.6  | 13.0  | -9.5  | 14.1 | 9.2   | -4.1  | -7.8  |
| ANTHRAQUINONE                   | 66.0 | 35.2  | -12.2 | -12.0 | 56.2 | 47.7  | -43.2 | -7.2  |
| SOLANESYL ACETATE               | 59.0 | 47.9  | 10.2  | -14.5 | 39.6 | 48.9  | -24.0 | -10.1 |
| PRIDINOL METHANESULFONATE       | 42.6 | 10.0  | 18.2  | -11.1 | 44.0 | 30.9  | -23.2 | -7.4  |
| HELICIN                         | 55.9 | 36.1  | 17.8  | -11.2 | 45.7 | 47.8  | -23.7 | -6.6  |
| N-METHYL-D-ASPARTIC ACID (NMDA) | 46.6 | -0.1  | 15.9  | -9.9  | 54.1 | 34.4  | -34.8 | -5.3  |
| CARYOPHYLLENE OXIDE             | 53.4 | 36.5  | 1.0   | -14.2 | 50.9 | 47.5  | -58.3 | -6.9  |
| LACCAIC ACID A                  | 39.3 | 11.3  | 18.5  | -12.2 | 33.7 | 29.8  | 12.1  | -8.0  |
| S-ISOCORYDINE (+)               | 38.3 | 11.1  | 17.4  | -6.1  | 38.7 | 36.3  | -0.9  | -4.6  |
| HYDROXYPROGESTERONE             | 30.9 | -1.8  | 8.7   | -11.4 | 55.7 | 29.2  | -29.4 | -5.7  |

|                                   |       |       |      |       |      |      |       |      |
|-----------------------------------|-------|-------|------|-------|------|------|-------|------|
| ESCULETIN                         | 47.0  | 25.9  | 10.3 | -6.1  | 59.3 | 47.9 | -18.9 | -2.9 |
| XANTHOXYLIN                       | 40.9  | 7.1   | 24.5 | 0.6   | 46.0 | 17.3 | 13.3  | -7.2 |
| KINETIN RIBOSIDE                  | 30.5  | 7.8   | 23.3 | -5.7  | 51.2 | 38.6 | 0.4   | 7.2  |
| BETA-SITOSTEROL                   | 16.3  | -22.5 | 25.4 | -3.5  | 5.1  | -9.8 | 11.3  | -3.7 |
| SCOPOLETIN                        | -13.3 | 7.7   | 15.4 | 3.2   | -3.7 | 13.2 | -16.0 | -0.1 |
| ARABITOL(D)                       | 55.2  | 29.2  | 7.4  | -9.8  | 31.5 | 21.8 | -30.5 | -6.4 |
| PARTHENOLIDE                      | 71.5  | 66.1  | 1.6  | -12.0 | 49.6 | 50.1 | -37.6 | -6.4 |
| DIHYDROTANSHINONE I               | 70.2  | 66.4  | -6.8 | -10.2 | 51.1 | 43.0 | -85.0 | -6.0 |
| CONVALLATOXIN                     | 52.8  | 33.7  | 23.1 | -13.4 | 46.5 | 47.1 | -19.5 | 0.7  |
| 3,4-DIMETHOXYDALBERGIONE          | 56.3  | 27.3  | 7.4  | -13.7 | 53.1 | 38.7 | -32.8 | -8.4 |
| LAGOCHILIN                        | 42.8  | 25.1  | 16.5 | -12.9 | 50.5 | 48.5 | -20.6 | 7.7  |
| DIGITONIN                         | 45.7  | 15.5  | 19.6 | -5.3  | 28.3 | 12.1 | 11.1  | -2.1 |
| HIERACIN                          | 26.6  | 5.0   | 17.1 | -12.4 | 32.8 | 38.2 | 14.8  | 6.3  |
| ISOROTENONE                       | 43.9  | -0.2  | 8.1  | -7.9  | 58.4 | 36.0 | -17.4 | -4.7 |
| RHETSININE                        | 26.2  | -1.9  | 13.4 | -1.0  | 52.6 | 45.1 | -30.7 | 10.4 |
| CHOLESTANE                        | 37.2  | 4.2   | 13.0 | -2.1  | 45.1 | 26.2 | -45.6 | 10.5 |
| LAPPACONITINE                     | 33.1  | 12.6  | 12.6 | -1.9  | 35.6 | 31.0 | -14.7 | 12.2 |
| 3alpha-ACETOXYDIHYDRODEOXYGEDUNIN | 0.9   | -11.0 | 15.4 | -1.6  | 6.2  | 27.5 | -32.8 | -4.7 |
| PLUMBAGIN                         | 27.5  | 3.2   | 16.0 | -8.4  | 2.8  | 17.1 | 6.1   | -1.1 |
| GLAFENINE                         | 72.0  | 43.5  | -6.6 | -15.2 | 46.0 | 41.1 | -41.3 | -8.9 |
| 2',4'-DIHYDROXY-4-METHOXYCHALCONE | 63.6  | 52.8  | 6.6  | -12.0 | 47.2 | 55.2 | -23.6 | -6.5 |
| TOLFENAMIC ACID                   | 83.6  | 42.6  | -0.3 | -14.6 | 43.3 | 27.6 | -63.0 | -8.2 |
| LUPANYL ACID HYDROCHLORIDE        | 54.9  | 45.5  | 21.4 | -11.0 | 51.2 | 52.6 | -16.4 | -6.1 |
| AMINOCYCLOPROPANECARBOXYLIC ACID  | 65.0  | 23.1  | 15.8 | -9.9  | 47.3 | 24.0 | -40.2 | -6.3 |
| INDOLE-3-CARBINOL                 | 76.1  | 65.6  | 18.2 | -12.4 | 47.3 | 45.0 | -39.5 | -5.7 |
| BUCLADESINE                       | 42.6  | 6.7   | 22.0 | -10.2 | 31.6 | 15.9 | -2.2  | -7.6 |
| RHIZOCARPIC ACID                  | 37.5  | 13.3  | 24.5 | -10.1 | 40.4 | 43.9 | -13.1 | -4.6 |
| RETINYL ACETATE                   | 41.9  | 19.6  | 11.8 | -10.4 | 46.3 | 22.0 | -34.9 | -6.4 |
| URSOCHOLANIC ACID                 | 43.2  | 20.1  | 5.9  | -9.1  | 54.8 | 48.1 | -36.1 | -6.2 |
| STRYCHNINE METHIODIDE             | 31.3  | 5.7   | 17.0 | -3.4  | 35.7 | 16.4 | -20.4 | -7.9 |
| CORALYNE CHLORIDE                 | 45.4  | 31.9  | 17.9 | -6.8  | 40.0 | 38.3 | -16.7 | -6.6 |
| LIMONIN                           | 13.1  | -11.8 | 19.5 | -5.0  | 16.7 | 6.5  | 3.1   | -4.6 |
| CHOLIC ACID, METHYL ESTER         | 29.6  | 8.0   | 13.9 | -10.3 | -1.8 | 21.4 | 3.7   | 1.3  |
| DEGUELIN(-)                       | 63.3  | 53.6  | 21.6 | -10.9 | 41.9 | 39.8 | -32.1 | -6.8 |
| KARANJIN                          | 62.2  | 51.3  | 8.1  | -10.4 | 49.5 | 45.0 | -21.1 | -5.6 |
| FORMONONETIN                      | 43.0  | 28.9  | 12.4 | -12.4 | 48.0 | 43.9 | -37.6 | -7.4 |
| AMYGDALIN                         | 39.9  | 31.9  | 23.2 | -10.9 | 43.0 | 47.2 | -9.8  | -6.7 |
| 7,4'-DIMETHOXYISOFLAVONE          | 49.9  | 15.1  | 16.7 | -9.9  | 49.7 | 29.1 | -29.0 | -5.6 |
| AZADIRACTIN                       | 49.7  | 30.1  | 9.9  | -12.9 | 49.2 | 51.2 | -31.1 | -6.5 |
| KUHLMANNIN                        | 33.0  | 8.8   | 21.8 | -10.6 | 37.5 | 24.7 | 0.6   | -6.2 |

|                                                             |       |       |       |       |      |       |        |      |
|-------------------------------------------------------------|-------|-------|-------|-------|------|-------|--------|------|
| CAFESTOL                                                    | 31.2  | 19.7  | 14.7  | -10.0 | 33.1 | 53.0  | 3.2    | -5.7 |
| HYDROQUINIDINE                                              | 46.1  | 13.2  | 15.8  | -8.6  | 56.5 | 37.7  | -15.9  | -7.0 |
| SALSOLINE                                                   | 41.3  | 10.8  | 7.8   | -9.9  | 41.8 | 42.6  | -8.9   | -5.5 |
| LITHOCHOL-11-ENIC ACID                                      | 36.5  | 35.1  | -10.3 | -10.0 | 35.8 | 20.1  | -5.7   | -3.7 |
| DIFFRACTAIC ACID                                            | 27.4  | 30.4  | -8.6  | -1.9  | 28.6 | 39.6  | -79.0  | -5.3 |
| SOLASODINE                                                  | 1.8   | -8.5  | 22.4  | -5.6  | 19.7 | -3.0  | -16.6  | -6.9 |
| ASARININ (-)                                                | -12.9 | 29.6  | -9.1  | -11.7 | -5.2 | 9.4   | -65.9  | -4.3 |
| DIGOXIGENIN                                                 | 42.0  | 15.3  | 8.6   | -10.4 | 40.0 | 30.7  | -34.1  | -7.5 |
| DIHYDROMYRISTICIN                                           | 42.0  | 41.1  | 7.2   | -9.1  | 39.2 | 50.1  | -21.5  | -6.2 |
| CAPERATIC ACID                                              | 41.7  | 15.7  | 18.9  | -11.3 | 38.8 | 28.9  | -5.3   | -3.9 |
| 3,4-DIMETHOXYCINNAMIC ACID                                  | 48.8  | 37.6  | 26.6  | -11.4 | 41.5 | 47.3  | -17.0  | -6.2 |
| MEBHYDROLIN NAPHTHALENESULFONATE                            | 45.2  | 8.8   | 13.3  | -11.0 | 45.2 | 27.5  | -17.5  | -2.3 |
| DESOXYPEGANINE HYDROCHLORIDE                                | 30.0  | 7.9   | 16.7  | -12.4 | 48.8 | 50.5  | -103.4 | -9.1 |
| ESTRADIOL-3-SULFATE, SODIUM SALT                            | 23.9  | 5.3   | 26.1  | -10.4 | 38.2 | 24.9  | 17.6   | -2.6 |
| LUPANINE PERCHLORATE                                        | 30.4  | 22.0  | 23.3  | -10.1 | 32.3 | 42.0  | 10.3   | -6.5 |
| CYCLOLEUCINE                                                | 38.2  | 10.4  | 18.0  | -10.8 | 43.9 | 30.5  | -17.6  | 3.5  |
| SOLANESOL                                                   | 40.8  | 12.5  | 15.5  | -7.0  | 43.6 | 43.6  | -13.9  | -7.7 |
| MORIN                                                       | 24.9  | 1.1   | 22.4  | -12.0 | 55.1 | 34.7  | -32.3  | 6.9  |
| ANDROSTERONE                                                | 32.9  | 9.6   | 16.7  | 4.3   | 22.4 | 31.7  | -7.3   | -3.6 |
| PERICIAZINE                                                 | 5.6   | -11.5 | 17.1  | -4.0  | 21.3 | -16.4 | -17.9  | -5.2 |
| CEPHALOSPORIN C SODIUM                                      | -26.4 | 13.6  | 20.6  | 5.1   | 3.5  | 1.6   | 15.7   | 22.0 |
| PANGAMIC ACID SODIUM                                        | -5.0  | -3.7  | 14.6  | -9.9  | 39.5 | 37.1  | -38.4  | -7.9 |
| BOLDINE                                                     | 44.8  | 48.4  | 10.5  | -9.7  | 54.7 | 57.4  | -41.4  | -6.1 |
| GUAIAL(-)                                                   | 39.7  | 18.6  | 2.5   | -12.0 | 39.3 | 34.2  | -27.8  | -5.7 |
| GINKGOLIDE A                                                | 38.8  | 37.6  | 19.0  | -8.9  | 35.9 | 42.4  | -26.3  | -7.6 |
| 7,8-DIHYDROXYFLAVONE                                        | 56.0  | 27.4  | 20.1  | -9.9  | 48.0 | 25.9  | -72.0  | -5.9 |
| LINALOOL (+)                                                | 45.5  | 34.5  | 21.1  | -9.6  | 48.7 | 45.2  | -47.9  | -7.2 |
| CHRYSOPHANOL                                                | 30.1  | -3.2  | 15.6  | -11.5 | 39.5 | 25.2  | -5.8   | -7.0 |
| HEMATEIN                                                    | 12.5  | 17.8  | 14.0  | 1.0   | 55.8 | 55.6  | -16.1  | -5.8 |
| IRIGINOL HEXAACEATATE                                       | 36.6  | -1.8  | 13.5  | -12.5 | 43.4 | 20.9  | -52.9  | -8.9 |
| DESACETYLCOLFORSIN                                          | 40.3  | 15.1  | 9.9   | -11.5 | 48.1 | 44.9  | -39.3  | -2.1 |
| beta-TOXICAROL                                              | 36.9  | 31.6  | 17.2  | -9.2  | 29.6 | 8.1   | -21.9  | 9.7  |
| TRIPTOPHENOLIDE                                             | 31.0  | 19.3  | 14.2  | 9.3   | 23.7 | 31.9  | -6.4   | 9.0  |
| OCTOPAMINE HYDROCHLORIDE                                    | 11.0  | -8.3  | 18.3  | -2.1  | 4.7  | -12.3 | -23.0  | -7.3 |
| RHOIFOLIN                                                   | -8.3  | 25.7  | 11.1  | -9.1  | 5.0  | 35.3  | -16.8  | 1.4  |
| BROMO-3-HYDROXY-4-(SUCCIN-2-YL)-<br>CARYOLANE gamma-LACTONE | 45.5  | 14.8  | -9.2  | -10.3 | 19.7 | 14.0  | -68.5  | -7.0 |
| 10-HYDROXYCAMPTOTHECIN                                      | 51.3  | 41.2  | 9.3   | -5.8  | 43.4 | 54.7  | -40.4  | -5.9 |
| DICTAMNINE                                                  | 28.5  | -5.7  | 3.3   | -9.2  | 32.6 | 15.5  | -44.1  | -1.2 |
| TETRANDRINE                                                 | 49.1  | 37.4  | 24.3  | -8.7  | 38.8 | 47.3  | -21.4  | -6.5 |

|                                                         |      |       |       |       |       |       |       |       |
|---------------------------------------------------------|------|-------|-------|-------|-------|-------|-------|-------|
| IRIGENIN                                                | 53.4 | 9.1   | 10.1  | -7.3  | 40.3  | 28.4  | -38.0 | -6.8  |
| EUPHORBIASTEROID                                        | 16.4 | 15.1  | 2.9   | 32.2  | -12.5 | -26.4 | -18.2 | 15.4  |
| 3-HYDROXY-4-(SUCCIN-2-YL)-CARYOLANE<br>delta-LACTONE    | 45.2 | -8.2  | -18.7 | -43.7 | 26.3  | -1.0  | -16.0 | -13.1 |
| 2',4'-DIHYDROXYCHALCONE                                 | 37.6 | -0.1  | -10.9 | -15.8 | 33.2  | 3.5   | -20.8 | -11.3 |
| PERUVOSIDE                                              | 38.0 | -20.1 | -3.5  | -46.4 | 28.5  | -10.1 | 10.7  | -6.4  |
| 2',3-DIHYDROXY-4,4',6'-<br>TRIMETHOXYCHALCONE           | 38.0 | -2.1  | 7.7   | -23.0 | 40.6  | 25.8  | -21.5 | -3.6  |
| 6,7-DICHLORO-3-HYDROXY-2-<br>QUINOXALINECARBOXYLIC ACID | 35.7 | -36.7 | -4.8  | -31.4 | 37.0  | -27.8 | 12.9  | 6.9   |
| THEANINE                                                | 41.8 | -10.4 | -1.7  | -39.9 | 49.4  | 15.2  | -28.2 | -13.6 |
| ISOGUVACINE HYDROCHLORIDE                               | 30.1 | -62.4 | 11.9  | -2.8  | 39.1  | -28.2 | 20.7  | -5.9  |
| GENETICIN                                               | 47.2 | -1.8  | -4.2  | 0.0   | 46.4  | 3.2   | 3.5   | -5.2  |
| D-PHENYLALANINE                                         | 33.2 | -32.7 | -11.0 | 10.4  | 42.7  | -26.9 | -17.0 | -12.6 |
| SEROTONIN HYDROCHLORIDE                                 | 28.8 | -20.7 | -11.3 | 4.6   | 49.7  | 2.4   | -28.5 | 1.1   |
| ANISOMYCIN                                              | 43.7 | -56.8 | -10.0 | -43.0 | 54.3  | -11.3 | -6.6  | -18.9 |
| CARYOPHYLLENE [t(-)]                                    | 16.8 | -19.2 | 0.2   | 4.6   | 35.3  | 2.7   | -39.2 | -16.4 |
| 1-HYDROXY-3,6,7-TRIMETHOXY-2,8-<br>DIPRENYLXANTHONE     | 29.1 | -65.6 | 15.0  | 15.2  | 38.3  | -36.5 | 5.2   | -8.3  |
| HARMALINE                                               | 34.0 | 8.9   | 6.5   | -32.1 | 0.1   | -0.7  | -28.1 | -5.7  |
| MENTHYL BENZOATE                                        | 44.9 | -16.0 | -6.5  | -28.0 | 40.6  | 4.2   | -18.9 | -12.7 |
| GITOXIN                                                 | 55.7 | 21.4  | -6.1  | -39.5 | 49.1  | 28.9  | -42.8 | -11.8 |
| MANDELIC ACID, METHYL ESTER                             | 52.5 | -12.8 | 1.4   | -44.4 | 48.1  | 19.9  | -6.3  | -13.2 |
| AZASERINE                                               | 59.4 | 28.3  | 2.8   | -39.6 | 39.1  | 19.0  | -1.1  | -12.1 |
| 5,7-DIHYDROXYISOFLAVONE                                 | 68.4 | 4.1   | -5.7  | -46.0 | 45.5  | 2.5   | -24.7 | 1.8   |
| FISETIN                                                 | 38.2 | -6.7  | 1.9   | -38.8 | 41.3  | 8.7   | -26.0 | -12.4 |
| 2-METHOXYRESORCINOL                                     | 48.4 | -35.1 | 8.7   | -23.3 | 32.0  | -7.1  | 28.6  | -7.5  |
| CEVADINE                                                | 44.4 | -14.8 | 5.8   | -20.2 | 31.7  | 0.9   | 1.1   | -6.9  |
| 6-HYDROXYANGOLENSIC ACID METHYL<br>ESTER                | 57.6 | -24.8 | -5.2  | -7.5  | 33.1  | -13.7 | -16.8 | 9.7   |
| UBIDECARENEONE                                          | 46.8 | -16.0 | -10.7 | -25.2 | 37.7  | 3.9   | -31.8 | -11.0 |
| STIGMASTA-4,22-DIEN-3-ONE                               | 49.7 | -18.6 | -1.6  | -33.1 | 47.1  | -0.3  | -28.2 | 5.4   |
| THERMOPSINE PERCHLORATE                                 | 40.9 | -11.2 | 0.6   | -20.6 | 20.2  | 1.7   | -16.4 | -7.9  |
| FARNESOL                                                | 40.0 | -59.5 | 3.8   | -36.8 | 9.9   | -59.3 | 20.6  | -1.1  |
| LINAMARIN                                               | 30.0 | 2.4   | 5.3   | -22.9 | 14.6  | -7.9  | -5.9  | -1.5  |
| ROTENONE                                                | 60.8 | 19.0  | -4.4  | -19.6 | 22.6  | 2.2   | -24.3 | -14.6 |
| ISOLIQUIRITIGENIN                                       | 63.0 | 36.4  | -9.1  | -44.0 | 32.4  | 16.3  | -21.9 | -13.5 |
| APIGENIN DIMETHYL ETHER                                 | 58.2 | 25.8  | -13.4 | -43.8 | 43.5  | 16.6  | -56.2 | -14.7 |
| ASTRAGALOSIDE IV                                        | 55.1 | 8.7   | 0.6   | -42.2 | 26.1  | 10.4  | -11.8 | -10.6 |
| OXONITINE                                               | 56.2 | 18.0  | -4.2  | -46.0 | 53.3  | 5.2   | -23.0 | -13.4 |

|                                                              |      |       |       |       |       |       |       |       |
|--------------------------------------------------------------|------|-------|-------|-------|-------|-------|-------|-------|
| MANGIFERIN                                                   | 58.2 | 4.5   | -2.7  | -45.1 | 52.4  | 19.1  | -15.0 | -15.9 |
| PROTOVERATRINE A                                             | 44.6 | -13.4 | 10.3  | -29.8 | 28.9  | 3.0   | 11.7  | 0.6   |
| GARLICIN                                                     | 50.7 | -17.1 | 5.7   | -35.2 | 35.9  | 11.4  | 7.3   | -17.3 |
| 4-NAPHTHALIMIDOBUTYRIC ACID                                  | 49.5 | -5.9  | -13.1 | -42.7 | 61.3  | 17.7  | -10.7 | -13.8 |
| HUPERZINE A                                                  | 51.1 | -10.0 | -9.7  | -44.4 | 53.2  | 19.3  | -39.0 | -8.9  |
| p-CHLOROPHENYLALANINE                                        | 50.4 | 19.9  | 6.0   | -34.5 | 57.7  | 18.3  | -11.8 | -16.4 |
| SECURININE                                                   | 42.2 | -22.5 | 11.5  | -39.3 | 30.1  | 8.0   | -24.1 | -13.4 |
| EXALAMIDE                                                    | 36.8 | -38.9 | -3.2  | -34.7 | -2.7  | -27.5 | 9.7   | 2.1   |
| SYRINGIC ACID                                                | 28.0 | 3.7   | 14.2  | -15.5 | 16.8  | -13.2 | -7.6  | -5.6  |
| CACODYLIC ACID                                               | 55.6 | 17.1  | -13.0 | -24.7 | 36.8  | 22.5  | -17.7 | -14.0 |
| CHOLEST-5-EN-3-ONE                                           | 65.1 | 27.6  | -14.8 | -37.5 | 45.6  | 22.4  | -9.0  | -16.7 |
| MANGOSTIN TRIMETHYL ETHER                                    | 63.3 | 20.1  | 1.8   | -23.3 | 36.8  | 7.1   | -23.9 | -13.8 |
| HARMANE                                                      | 62.5 | 24.2  | -13.6 | -37.0 | 37.4  | 21.5  | -17.1 | -15.0 |
| 1R,2S-PHENYLPROPYLAMINE                                      | 58.1 | 13.6  | -2.1  | -31.2 | 46.8  | 12.8  | -22.0 | -16.8 |
| 18alpha-GLYCYRRHETINIC ACID                                  | 62.1 | 19.6  | -7.0  | -45.2 | 40.6  | 9.7   | -27.7 | -8.5  |
| CITRININ                                                     | 49.9 | -13.9 | 11.1  | -20.1 | 30.8  | 7.6   | 12.4  | -14.2 |
| CHLORPYRIFOS                                                 | 50.7 | -4.3  | 14.1  | -35.2 | 33.6  | 8.9   | 6.0   | -6.9  |
| CINEOLE                                                      | 55.8 | 4.6   | -10.3 | -35.9 | 44.4  | 8.2   | -25.2 | -14.4 |
| MONOCROTALINE                                                | 48.2 | -6.4  | -13.0 | -46.2 | 44.4  | 11.8  | -43.3 | -15.0 |
| KOBUSONE                                                     | 57.6 | 7.8   | 3.4   | -36.6 | 45.9  | 2.8   | -33.2 | -16.3 |
| TRYPTAMINE                                                   | 46.9 | -12.0 | 17.9  | -22.7 | 36.3  | 11.8  | -19.2 | -16.5 |
| LIGUSTILIDE                                                  | 26.6 | -43.3 | 6.0   | -24.4 | -11.3 | -16.4 | -10.3 | 3.6   |
| alpha-MANGOSTIN                                              | 12.9 | 14.2  | 15.8  | -20.0 | 8.6   | -3.9  | -30.9 | -12.7 |
| LATHOSTEROL                                                  | 59.2 | 9.1   | -4.1  | -31.2 | 36.5  | 15.1  | -25.4 | -11.0 |
| FUCOSTANOL                                                   | 77.4 | 49.0  | -21.1 | -45.1 | 56.1  | 42.1  | 9.6   | -13.2 |
| NEROL                                                        | 64.5 | 16.0  | 4.0   | -41.7 | 38.6  | 16.3  | -16.6 | -12.1 |
| 3,7-DIHYDROXYFLAVONE                                         | 74.5 | 45.2  | -15.0 | -47.9 | 45.2  | 22.9  | -19.7 | -13.6 |
| GAMBOGIC ACID                                                | 76.5 | 6.8   | 34.0  | -43.0 | 34.3  | -7.8  | -11.6 | -17.4 |
| CANTHAXANTHIN (euglenanone)                                  | 76.8 | 36.9  | -5.1  | -46.9 | 46.4  | 20.4  | -23.8 | -15.4 |
| 5beta-12-METHOXY-4,4-BISNOR-8,11,13-<br>PODOCARPATRIEN-3-ONE | 44.1 | -13.3 | 10.2  | -32.0 | 34.7  | 10.1  | -26.2 | -14.8 |
| DEMETHYLNobiletin                                            | 69.0 | 11.8  | 3.2   | -45.4 | 38.7  | 15.5  | 7.7   | -5.6  |
| ARTHONIOIC ACID                                              | 47.5 | -18.2 | -11.2 | -38.7 | 35.0  | -9.7  | -39.4 | -13.7 |
| PIPLARTINE                                                   | 57.7 | 6.5   | -17.0 | -43.6 | 36.5  | 15.3  | -32.3 | -3.8  |
| 3-AMINOPROPANESULPHONIC ACID                                 | 63.0 | -0.9  | 10.7  | -24.1 | 42.7  | -4.0  | -20.3 | -14.3 |
| ASIATIC ACID                                                 | 54.8 | -3.0  | -6.9  | -44.0 | 41.9  | 22.3  | -93.2 | -12.1 |
| IMIDAZOL-4-ylacetic acid sodium salt                         | 39.7 | -28.4 | 24.1  | -21.1 | 6.5   | -30.5 | -3.3  | 7.5   |
| ICARIIN                                                      | 34.0 | 2.0   | 11.4  | -22.2 | 18.3  | -11.1 | -8.4  | -3.9  |
| ABIETIC ACID                                                 | 60.3 | 23.0  | -14.3 | -45.9 | 17.6  | 14.6  | -21.4 | -14.8 |
| CURCUMIN                                                     | 58.7 | 32.3  | -3.2  | -37.4 | 45.1  | 42.8  | -27.5 | -14.3 |

|                                               |      |       |       |       |      |       |       |       |
|-----------------------------------------------|------|-------|-------|-------|------|-------|-------|-------|
| HEXAMETHONIUM BROMIDE                         | 52.1 | 8.6   | -12.6 | -38.7 | 35.5 | 14.2  | -13.9 | -12.8 |
| AGARIC ACID                                   | 61.0 | 30.1  | 6.0   | -41.7 | 50.2 | 33.6  | -17.8 | -14.7 |
| THIOCTIC ACID                                 | 60.2 | 4.9   | -6.1  | -43.8 | 46.4 | 17.7  | -25.9 | -16.6 |
| CHOLEST-4,6-DIEN-3-ONE                        | 58.0 | 14.7  | -3.8  | -41.3 | 43.8 | 20.3  | -13.3 | -13.6 |
| KAEMPFEROL                                    | 49.1 | 1.3   | 4.6   | -40.5 | 20.7 | 5.1   | -46.4 | -4.1  |
| MIMOSINE                                      | 45.6 | -14.5 | 7.8   | -37.5 | 30.3 | 5.7   | -15.0 | -10.3 |
| KAINIC ACID                                   | 55.5 | -6.0  | -13.0 | -45.8 | 47.0 | 13.3  | -33.1 | -7.5  |
| 3-HYDROXYFLAVONE                              | 59.0 | -2.9  | -25.5 | -45.0 | 54.3 | 4.9   | -53.0 | -17.5 |
| ACTINONIN                                     | 79.9 | 38.4  | 24.4  | -26.1 | 47.7 | 6.6   | -52.8 | -12.5 |
| RESVERATROL                                   | 48.1 | -21.8 | 3.8   | -38.2 | 36.7 | 15.0  | -31.4 | -9.8  |
| HUMULENE (alpha)                              | 38.8 | -20.6 | 2.9   | -34.4 | 19.5 | -24.1 | -33.5 | -8.3  |
| QUEBRACHITOL                                  | 74.2 | 45.6  | -1.2  | -41.3 | 37.6 | 27.3  | -11.2 | -16.6 |
| RETUSIN 7-METHYL ETHER                        | 23.0 | -9.1  | 5.4   | -29.4 | 0.6  | 13.4  | -39.1 | -10.2 |
| BATYL ALCOHOL                                 | 84.0 | 59.9  | -10.6 | -43.4 | 39.5 | 14.7  | -36.1 | -17.5 |
| ANDROGRAPHOLIDE                               | 72.3 | 35.4  | -4.9  | -44.6 | 49.6 | 37.4  | -17.2 | -16.1 |
| HEDERAGENIN                                   | 70.9 | 39.5  | -6.0  | -45.5 | 32.7 | 26.3  | -66.8 | -14.3 |
| TRIGONELLINE                                  | 72.4 | 39.0  | -7.4  | -48.1 | 44.6 | 19.0  | -41.3 | -18.3 |
| TOMATINE                                      | 54.7 | -12.8 | -4.4  | -45.3 | 41.8 | 23.0  | -33.6 | -12.6 |
| ROSMARINIC ACID                               | 74.2 | 23.3  | 2.1   | -45.5 | 36.7 | 6.0   | -0.2  | 11.5  |
| 6,3'-DIMETHOXYFLAVONE                         | 41.6 | -14.1 | 3.1   | -42.1 | 25.7 | 0.1   | -52.2 | -14.8 |
| ORSELLINIC ACID, ETHYL ESTER                  | 57.1 | 3.9   | -5.9  | -38.9 | 40.1 | 3.6   | -28.4 | 0.8   |
| 18-AMINOABIETA-8,11,13-TRIENE SULFATE         | 55.1 | -0.4  | -2.9  | -45.0 | 40.7 | 19.3  | -11.2 | 11.4  |
| 2,3,4-TRIHYDROXY-4'-<br>ETHOXYBENZOPHENONE    | 65.8 | 19.0  | 15.6  | -38.4 | 45.7 | 11.5  | -25.3 | -11.8 |
| BACCATIN III                                  | 58.6 | -13.1 | 6.8   | -39.5 | 34.7 | 20.2  | -13.7 | -1.6  |
| ADONITOL                                      | 53.5 | -10.3 | -19.8 | -38.3 | 18.8 | -17.8 | -1.1  | 8.8   |
| 2',4-DIHYDROXY-3,4',6'-<br>TRIMETHOXYCHALCONE | 28.1 | -6.5  | 10.2  | -21.9 | 12.6 | -4.9  | -24.7 | -11.7 |
| SULFAPHENAZOLE                                | 78.5 | 44.5  | 5.5   | -46.4 | 34.3 | 26.0  | -24.0 | -1.9  |
| AURAPTENE                                     | 66.1 | 49.4  | -16.2 | -45.0 | 34.3 | 14.1  | -14.0 | -15.9 |
| N- (9-FLUORENYLMETHOXYCARBONYL)-L-<br>LEUCINE | 59.7 | 25.7  | -3.6  | -44.4 | 36.9 | 25.6  | -10.3 | -6.8  |
| NOBILETIN                                     | 66.9 | 28.5  | 8.3   | -44.9 | 47.9 | 26.3  | -7.2  | -11.6 |
| PHENETHYL CAFFEATE (CAPE)                     | 50.6 | 0.5   | 4.9   | -47.3 | 37.8 | 10.3  | -23.5 | -12.5 |
| 3,4',5,6,7-PENTAMETHOXYFLAVONE                | 60.6 | 3.0   | 13.6  | -43.4 | 51.7 | 17.4  | -20.9 | -5.8  |
| ZOPICLONE                                     | 52.2 | -7.5  | 17.4  | -43.0 | 29.8 | 4.3   | 12.3  | 4.9   |
| SKATOLE                                       | 52.3 | -9.8  | 22.0  | -41.8 | 34.5 | 4.4   | -9.9  | -13.0 |
| 5-METHYLFURMETHIDE                            | 60.4 | -2.6  | -4.5  | -44.2 | 44.7 | 13.9  | -10.1 | -13.6 |
| 7-OXOCHOLESTEROL                              | 51.5 | -11.1 | 4.8   | -26.1 | 40.5 | 19.7  | -22.6 | -16.1 |
| MEVALONIC ACID LACTONE                        | 60.7 | -3.9  | 13.5  | -44.5 | 28.1 | 4.9   | 8.0   | -15.8 |

|                                       |      |       |       |       |       |       |       |       |
|---------------------------------------|------|-------|-------|-------|-------|-------|-------|-------|
| NORHARMAN                             | 51.0 | -16.9 | 6.2   | -43.3 | 40.1  | 13.8  | -32.0 | -12.1 |
| LOBARIC ACID                          | 31.9 | -21.4 | 4.9   | -33.9 | -14.8 | -18.1 | -4.2  | -11.3 |
| BERBAMINE HYDROCHLORIDE               | 21.4 | -8.8  | 15.5  | 0.3   | 11.3  | 5.7   | -17.3 | -0.5  |
| DIMETHYLCAFFEIC ACID                  | 71.1 | 31.1  | 4.6   | -27.8 | 36.5  | 11.8  | 12.7  | -9.3  |
| CELLOBIOSE (D[+])                     | 60.1 | 23.5  | -8.2  | -42.1 | 38.9  | 34.5  | -38.6 | -15.7 |
| YOHIMBIC ACID HYDRATE                 | 62.9 | 16.4  | 9.7   | -44.9 | 44.6  | 21.2  | -19.0 | 5.3   |
| URIDINE TRIPHOSPHATE TRISODIUM        | 46.5 | -0.5  | 16.6  | -47.3 | 41.2  | 32.5  | -3.2  | -14.8 |
| ROBUSTIC ACID                         | 78.1 | 53.0  | -25.1 | -42.8 | 27.5  | -4.8  | -30.4 | -12.7 |
| CAFESTOL ACETATE                      | 49.0 | -10.1 | 12.4  | -44.5 | 41.4  | 22.3  | -30.3 | -14.7 |
| TRIDESACETOXYKHIVORIN                 | 44.8 | -19.6 | 18.9  | -39.2 | 30.0  | 11.9  | -22.5 | -12.1 |
| hederacoside C                        | 43.3 | -19.1 | 24.7  | -39.0 | 31.0  | 8.7   | 1.1   | -14.0 |
| ARTEMISIN                             | 50.8 | -10.8 | 4.4   | -29.5 | 48.3  | 9.9   | -32.6 | -4.1  |
| DIOSMETIN                             | 30.8 | 0.7   | 1.7   | -47.3 | 32.9  | 4.2   | -23.5 | -16.7 |
| BUFEXAMAC                             | 59.4 | -1.6  | 7.6   | -39.4 | 33.8  | 19.6  | -9.9  | -12.1 |
| LEUCODIN                              | 48.1 | -17.3 | 6.7   | -38.5 | 34.9  | 20.8  | -21.9 | -13.0 |
| PYRROMYCIN                            | 45.7 | -45.6 | 20.8  | -13.2 | 9.6   | -29.6 | 15.4  | -10.8 |
| PICROPODOPHYLLIN                      | 23.2 | -9.6  | 18.3  | -5.5  | 9.7   | -2.4  | 3.2   | -6.6  |
| THYMOQUINONE                          | 68.1 | 30.4  | 1.7   | -43.1 | 39.3  | 20.1  | -33.7 | 7.5   |
| SALVINORIN A                          | 63.8 | 33.8  | -0.9  | -33.0 | 48.5  | 40.2  | -30.1 | -15.2 |
| 2-METHOXYXANTHONE                     | 53.3 | 2.2   | 12.4  | -45.1 | 39.6  | 5.8   | -29.1 | -16.2 |
| 2',4-DIHYDROXYCHALCONE                | 54.8 | 19.8  | 7.3   | -40.4 | 37.8  | 27.5  | -18.7 | -15.5 |
| SUXIBUZONE                            | 58.4 | 15.9  | -3.9  | -46.6 | 47.5  | 16.2  | -40.6 | -9.4  |
| L(+/-)-ALLIIN                         | 58.4 | 7.7   | -3.4  | -43.6 | 37.0  | 23.2  | -26.9 | -16.9 |
| alpha-CYANO-3-HYDROXYCINNAMIC ACID    | 50.5 | -7.4  | 22.5  | -35.8 | 35.3  | -2.4  | 12.4  | -7.7  |
| TANGERITIN                            | 45.7 | -23.4 | 22.4  | -34.9 | 40.5  | 13.9  | 0.2   | -15.6 |
| L-LEUCYL-L-ALANINE                    | 52.4 | -10.2 | 1.8   | -40.8 | 36.7  | 7.0   | -18.3 | -1.8  |
| SINENSETIN                            | 53.5 | -2.9  | -0.9  | -40.4 | 52.2  | 30.8  | -16.0 | -14.6 |
| METITEPINE MALEATE                    | 53.6 | 2.2   | 9.1   | -43.6 | 34.1  | 13.4  | -16.7 | -15.2 |
| MELIBIOSE                             | 41.5 | -8.7  | 10.0  | -29.2 | 28.2  | 13.4  | -9.6  | -13.6 |
| LEVULINIC ACID, 3-BENZYLIDENYL-       | 51.7 | -8.4  | 11.5  | -36.3 | 30.6  | -9.1  | -33.3 | -5.5  |
| CITRULLINE                            | 31.6 | -5.1  | 10.0  | -34.6 | 8.4   | -10.2 | -3.6  | 9.3   |
| N-ACETYLMURAMIC ACID                  | 60.7 | 23.7  | 0.9   | -44.0 | 38.3  | 36.8  | -27.2 | -14.7 |
| CORYNANTHINE                          | 63.7 | 38.2  | -10.2 | -43.6 | 42.2  | 38.5  | -29.5 | -16.8 |
| HOMOPTEROCARPIN                       | 50.0 | 2.3   | 11.6  | -39.6 | 43.8  | 21.8  | -9.1  | -15.7 |
| PICROTOXININ                          | 47.6 | 7.5   | 21.8  | -37.9 | 37.4  | 26.6  | -11.8 | -12.4 |
| EUPHOL                                | 43.3 | 9.7   | -0.3  | -42.0 | 30.6  | 0.8   | -19.3 | -14.7 |
| ASTAXANTHIN                           | 45.6 | -8.6  | 15.6  | -42.2 | 40.6  | 25.9  | -26.5 | -13.8 |
| 12a-HYDROXY-5-DEOXYDEHYDROMUNDUSERONE | 38.0 | -11.7 | 13.4  | -42.5 | 38.9  | 10.0  | -6.3  | -14.1 |
| ALOIN                                 | 47.2 | 0.8   | 13.1  | -41.8 | 32.4  | 15.6  | 4.8   | -1.1  |

|                                         |      |       |       |       |      |       |       |       |
|-----------------------------------------|------|-------|-------|-------|------|-------|-------|-------|
| PSEUDO-ANISATIN                         | 54.2 | -14.9 | -2.7  | -36.9 | 45.2 | 15.7  | -25.0 | -11.8 |
| CAFFEIC ACID                            | 59.1 | -6.3  | -1.1  | -40.0 | 42.5 | 20.8  | -27.1 | -14.7 |
| DIHYDROFISSINOLIDE                      | 60.6 | 1.9   | -0.1  | -35.5 | 39.6 | 13.4  | -27.1 | -12.0 |
| EVOXINE                                 | 45.4 | -10.6 | 7.5   | -35.2 | 31.2 | 18.8  | -31.9 | -12.7 |
| ANTIMYCIN A (A1 shown)                  | 32.0 | -40.7 | 17.1  | -9.6  | 23.7 | 2.5   | -22.0 | -6.1  |
| TRIACETYLRÉSVERATROL                    | 25.2 | -6.2  | 10.2  | -11.9 | 9.5  | -0.8  | -9.9  | 2.5   |
| HECOGENIN ACETATE                       | 51.7 | 12.3  | -2.0  | -39.4 | 37.8 | 19.5  | -17.5 | -17.2 |
| APHYLIC ACID                            | 63.1 | 30.8  | 0.0   | -42.5 | 49.8 | 39.1  | -13.6 | -13.6 |
| OBLIQUIN                                | 40.7 | -0.7  | 2.1   | -45.2 | 32.4 | 11.3  | -19.0 | -14.5 |
| 7-HYDROXYFLAVONE                        | 45.0 | 1.8   | -3.1  | -44.9 | 26.9 | 16.9  | -7.0  | -11.9 |
| SMILAGENIN                              | 52.8 | 3.0   | 1.7   | -40.9 | 40.5 | 12.6  | -2.7  | -15.5 |
| 11a-ACETOXYPROGESTERONE                 | 48.0 | 3.3   | -14.1 | -43.5 | 32.0 | 20.6  | -6.4  | -13.1 |
| ALANYL-DL-LEUCINE                       | 32.4 | -25.9 | 20.4  | -38.6 | 28.1 | -1.2  | 6.4   | -9.6  |
| 2',5'-DIHYDROXY-4-METHOXYCHALCONE       | 36.7 | -8.3  | 22.2  | -36.7 | 33.5 | 10.6  | -2.1  | -9.1  |
| AZOBENZENE                              | 38.8 | -22.7 | 4.5   | -35.8 | 40.0 | 4.1   | -10.0 | -13.3 |
| EPITESTOSTERONE                         | 58.6 | -1.9  | 1.2   | -33.7 | 39.3 | 18.1  | -2.9  | -9.4  |
| 5-FLUOROINDOLE-2-CARBOXYLIC ACID        | 54.1 | 6.3   | -3.9  | -34.3 | 15.1 | 5.5   | -34.2 | -12.6 |
| 3-HYDROXY-3',4'-DIMETHOXYFLAVONE        | 37.9 | -15.1 | 12.0  | -28.3 | 23.1 | 16.9  | -11.4 | -12.3 |
| 6alpha-METHYLPREDNISOLONE ACETATE       | 34.8 | -39.7 | 6.8   | -34.8 | 12.9 | -13.8 | -6.9  | -11.9 |
| 5-HYDROXY-2',4',7,8-TETRAMETHOXYFLAVONE | 2.1  | -13.7 | 11.6  | 0.7   | 16.2 | -7.8  | 0.1   | 5.7   |
| 1-PHENYLBIGUANIDE HYDROCHLORIDE         | 50.2 | 2.5   | 6.7   | -36.7 | 37.2 | 22.6  | -27.2 | -12.3 |
| ALEURETIC ACID                          | 60.1 | 27.9  | 4.8   | -38.1 | 32.9 | 29.3  | -11.2 | -14.4 |
| METHOXYAMINE HYDROCHLORIDE              | 46.5 | -4.4  | 14.4  | -43.0 | 41.5 | 22.0  | -16.3 | -13.6 |
| CHOL-11-ENIC ACID                       | 36.8 | 4.1   | 10.7  | -46.5 | 21.2 | 12.4  | -10.7 | -15.4 |
| KAWAIN                                  | 52.6 | 3.3   | 1.4   | -34.4 | 47.3 | 22.0  | -25.2 | -13.9 |
| KYNURAMINE                              | 45.7 | -13.5 | 18.7  | -47.5 | 37.8 | 17.8  | -17.0 | -7.9  |
| 4-METHOXYDALBERGIONE                    | 51.7 | -5.2  | 18.4  | -41.4 | 27.0 | 2.1   | 5.5   | -5.9  |
| CYTISINE                                | 39.5 | -10.1 | 29.0  | -34.2 | 37.5 | 18.7  | -0.9  | -11.3 |
| THEAFLAVIN DIGALLATE                    | 53.6 | 2.7   | 0.1   | 12.5  | 63.8 | 30.9  | -68.2 | -12.9 |
| HARMOL HYDROCHLORIDE                    | 54.6 | -13.1 | 0.3   | -36.9 | 38.0 | 18.6  | -15.4 | -9.5  |
| PYROCATECHUIC ACID                      | 49.3 | 3.1   | 16.0  | -41.3 | 29.5 | 8.4   | -8.6  | 5.2   |
| SAFROLE                                 | 45.7 | -11.1 | 13.1  | -37.5 | 28.4 | 17.5  | -23.2 | -13.0 |
| 4'-METHOXYFLAVONE                       | 41.8 | -28.6 | 7.3   | -34.9 | -9.2 | -56.4 | -24.0 | -2.2  |
| GLUCITOL-4-GUCOPYANOSIDE                | 21.1 | -12.8 | 8.5   | -39.6 | 5.1  | 9.1   | -24.2 | -1.0  |
| alpha-TOXICAROL                         | 47.2 | 38.8  | 6.1   | -40.9 | 43.5 | 23.6  | -55.3 | -17.7 |
| SALSOLIDINE                             | 60.8 | 46.1  | 0.1   | -40.0 | 39.6 | 35.1  | -30.8 | -15.2 |
| N-ACETYLPROLINE                         | 48.4 | -9.1  | 11.0  | -44.1 | 38.4 | 20.5  | -26.6 | -10.4 |
| MYRICETIN                               | 51.8 | 11.6  | 7.2   | -50.1 | 36.0 | 29.8  | -8.7  | -14.2 |
| PERILLIC ACID (-)                       | 49.9 | 9.1   | -7.5  | -45.5 | 40.5 | 19.4  | -41.7 | -15.4 |

|                                 |      |       |       |       |      |       |       |       |
|---------------------------------|------|-------|-------|-------|------|-------|-------|-------|
| ANABASAMINE HYDROCHLORIDE       | 54.0 | 7.9   | -14.0 | -47.1 | 39.0 | 21.6  | -19.9 | -15.7 |
| HAEMATOPORPHYRIN                | 36.1 | -26.3 | -9.8  | -46.6 | 28.9 | 5.8   | -13.7 | -13.9 |
| GYROMITRIN                      | 52.1 | 1.7   | 12.9  | -42.5 | 39.7 | 29.3  | 5.1   | -9.5  |
| 4'-HYDROXYCHALCONE              | 34.0 | -25.9 | 9.1   | -43.3 | 36.6 | -0.5  | -39.2 | -14.0 |
| 21-ACETOXPREGNENOLONE           | 57.2 | -4.3  | 2.6   | -36.4 | 43.7 | 25.6  | -31.4 | -9.7  |
| HARMALOL HYDROCHLORIDE          | 45.6 | -21.3 | 18.7  | -28.6 | 40.4 | 5.4   | -20.8 | -15.1 |
| GOSSYPETIN                      | 55.7 | -6.9  | 17.1  | -20.0 | 37.0 | 24.1  | -32.2 | -14.4 |
| TODRALAZINE HYDROCHLORIDE       | 39.5 | -24.3 | 19.0  | -25.6 | 8.7  | -18.9 | -22.3 | -11.3 |
| RHODOCLADONIC ACID              | 16.9 | -0.5  | 16.3  | -0.1  | 16.7 | -2.4  | -32.0 | -13.2 |
| p-FLUOROPHENYLALANINE           | 49.0 | 8.5   | 15.6  | -32.9 | 39.6 | 18.5  | -33.8 | -14.6 |
| PERILLYL ALCOHOL                | 54.2 | 41.1  | 2.3   | -40.8 | 32.8 | 40.0  | -4.2  | -18.1 |
| DEQUALINIUM CHLORIDE            | 75.2 | 52.2  | 70.6  | 2.3   | 39.9 | 13.5  | -1.4  | -16.4 |
| HEXAMETHYLQUERCETAGETIN         | 50.0 | 1.0   | 9.3   | -40.6 | 47.9 | 38.7  | -9.4  | -13.1 |
| SODIUM THIOGLYCOLATE            | 54.2 | 5.5   | 6.6   | -43.7 | 28.9 | -8.2  | -6.6  | -12.2 |
| alpha-ERGOCRYPTINE              | 42.3 | 1.4   | 1.3   | -39.8 | 42.3 | 22.4  | -19.3 | -15.5 |
| TULOButEROL                     | 35.9 | -16.5 | 11.2  | -13.8 | 24.7 | -3.6  | 3.4   | -12.5 |
| TRIMEDLURE                      | 37.0 | -11.5 | 11.1  | -20.2 | 32.9 | 18.6  | 7.3   | -10.7 |
| 2-MERCAPTOBENZOTHAZOLE          | 46.0 | -24.0 | 3.7   | -29.7 | 38.8 | 0.5   | -2.0  | -7.3  |
| TANSHINONE IIA SULFONATE SODIUM | 57.9 | 4.6   | -3.0  | -30.2 | 56.5 | 27.6  | -48.4 | -11.5 |
| 3-AMINO-1,2,4-TRIAZOLE          | 52.6 | -11.9 | 14.0  | -36.9 | 31.2 | 4.5   | -18.2 | -6.1  |
| 4'-DEMETHYLEPIPODOPHYLLOTOXIN   | 59.6 | -1.3  | 13.1  | -28.2 | 45.7 | 10.4  | -16.8 | -12.7 |
| PROXYPHYLLINE                   | 35.6 | -38.0 | 27.8  | 4.1   | 9.9  | -16.9 | -2.6  | 9.5   |
| METHIONINE SULFOXIMINE (L)      | 16.7 | 10.7  | 12.8  | 6.7   | 13.2 | -2.5  | -5.4  | 9.8   |
| DIHYDROFOLIC ACID               | 61.8 | 27.3  | 2.3   | -44.6 | 34.3 | 15.0  | -17.5 | -11.6 |
| ARTENIMOL                       | 50.2 | 35.1  | 4.1   | -42.3 | 32.8 | 36.2  | -22.3 | -5.2  |
| CRUSTECDYSONE                   | 48.8 | -9.1  | 14.4  | -43.2 | 43.5 | 25.8  | -13.3 | -13.6 |
| 2,5-DI-t-BUTYL-4-HYDROXYANISOLE | 59.4 | 22.6  | 8.8   | -47.6 | 44.5 | 38.2  | -14.7 | -12.9 |
| MADECASSIC ACID                 | 59.2 | 18.6  | -6.9  | -48.2 | 52.8 | 19.8  | -78.6 | -16.5 |
| L-PHENYLALANINOL                | 53.0 | 10.4  | 10.8  | -46.8 | 45.1 | 24.2  | -20.1 | -12.1 |
| CAMYLOFINE DIHYDROCHLORIDE      | 37.8 | -16.3 | 26.3  | -41.6 | 25.0 | 0.8   | 8.1   | -12.1 |
| SALSOLINOL HYDROBROMIDE         | 51.2 | -6.8  | 24.1  | -45.7 | 32.7 | 14.2  | 0.6   | -14.4 |
| ACETYLGLUTAMIC ACID             | 42.5 | -18.0 | 9.1   | -19.1 | 39.4 | 1.3   | -40.1 | -4.5  |
| GLICLAZIDE                      | 44.8 | 0.5   | 11.5  | -44.0 | 43.9 | 20.5  | -19.4 | -11.1 |
| N,N-HEXAMETHYLENEAMILORIDE      | 53.5 | -8.4  | 11.0  | -30.3 | 36.5 | 11.9  | -29.5 | -2.3  |
| VALINOMYCIN                     | 44.4 | -14.1 | 16.6  | -37.3 | 36.8 | 19.8  | -14.5 | -10.4 |
| AURIN TRICARBOXYLIC ACID        | 20.6 | -22.2 | -26.8 | -25.0 | -0.1 | -10.5 | -54.4 | -13.2 |
| VALERYL SALYCILATE              | -3.1 | -22.7 | 6.9   | -19.4 | 10.6 | -11.3 | -0.7  | 16.6  |
| ETHIONINE                       | 61.6 | 21.9  | 7.6   | -48.6 | 36.0 | 23.2  | -40.5 | -1.6  |
| TRIMETHYLCOLCHICINIC ACID       | 70.0 | 47.1  | -6.4  | -46.2 | 39.2 | 38.5  | -27.2 | -5.5  |
| ETHOXYQUIN                      | 52.6 | -15.8 | 4.2   | -47.7 | 45.3 | 17.6  | -16.3 | -16.2 |

|                                                                                   |      |       |       |       |      |       |       |       |
|-----------------------------------------------------------------------------------|------|-------|-------|-------|------|-------|-------|-------|
| ANCITABINE HYDROCHLORIDE                                                          | 41.5 | 5.7   | 25.2  | -41.2 | 41.1 | 31.3  | -20.5 | -13.1 |
| FENBUTYRAMIDE                                                                     | 58.6 | -2.7  | 5.8   | -43.7 | 40.6 | 8.2   | -7.4  | -11.3 |
| BISPHENOL A                                                                       | 56.4 | 15.6  | 2.4   | -40.8 | 34.9 | 16.7  | -28.3 | -12.3 |
| ACADESINE                                                                         | 40.3 | -18.3 | 15.5  | -44.7 | 24.6 | 4.8   | 0.4   | -2.0  |
| 3,3'-DIINDOLYLMETHANE                                                             | 30.9 | -1.2  | 29.8  | -35.1 | 28.1 | 18.2  | -11.8 | -9.3  |
| 11alpha-HYDROXYPROGESTERONE<br>HEMISUCCINATE                                      | 50.0 | -14.2 | 10.8  | -44.0 | 36.1 | 13.3  | -23.8 | -7.9  |
| THIOGUANOSINE                                                                     | 47.8 | 14.2  | -1.4  | -44.0 | 35.6 | 17.9  | -25.5 | -13.1 |
| O-BENZYL-L-SERINE                                                                 | 50.4 | -9.7  | 23.4  | -42.9 | 36.8 | 10.8  | -27.2 | -15.8 |
| CHOLIC ACID                                                                       | 43.4 | -11.1 | 19.4  | -30.9 | 24.1 | 18.7  | -66.7 | -14.5 |
| 2,3-DIMERCAPTOSUCCINIC ACID                                                       | 33.9 | -40.7 | 28.3  | -32.6 | 12.8 | -22.3 | -5.4  | -9.4  |
| 4-(3-BUTOXY-4-METHOXYBENZYL)IMIDAZOLIDIN-2-ONE                                    | 23.1 | 3.1   | 14.6  | -26.7 | 16.9 | -7.6  | -18.5 | 1.8   |
| 2-METHYL-4-(PIPERIDIN-1-YLCARBOXY)-5-ISOPROPYLPHENYLTRIMETHYLAMMONIUM<br>CHLORIDE | 51.6 | 16.1  | 8.3   | -33.0 | 35.9 | 23.3  | -34.9 | -15.9 |
| ELAIDYLPHOSPHOCHOLINE                                                             | 60.4 | 37.0  | 8.7   | -43.0 | 44.8 | 40.7  | -5.9  | -14.0 |
| DIFLORASONE DIACETATE                                                             | 45.5 | -5.1  | 24.5  | -47.9 | 42.7 | 25.4  | -21.3 | -15.0 |
| MOROXYDINE HYDROCHLORIDE                                                          | 55.4 | 21.4  | 15.6  | -44.8 | 52.7 | 33.7  | -2.7  | -11.5 |
| ACETYLGLUCOSAMINE                                                                 | 47.7 | -0.9  | 14.9  | -43.6 | 43.3 | 13.5  | -23.9 | -11.7 |
| 3-METHYLBENZYLXANTHINE                                                            | 53.5 | 10.1  | -22.1 | -45.5 | 63.7 | 42.3  | 1.5   | -13.2 |
| PUERARIN                                                                          | 34.9 | -7.9  | 33.6  | -40.5 | 28.4 | 5.7   | 13.1  | -15.5 |
| MANGANESE TETRAKIS(4-CARBOXYPHENYL)PORPHYRIN CHLORIDE                             | 46.7 | 5.4   | 22.8  | -39.4 | 28.9 | 15.6  | 5.7   | -11.4 |
| 4,4'-DIISOTHIOCYANOSTILBENE-2,2'-SUFONIC<br>ACID SODIUM SALT                      | 37.5 | -26.6 | 2.7   | -43.8 | 44.0 | 21.2  | -36.6 | -12.5 |
| 7-NITROINDAZOLE                                                                   | 50.1 | -5.2  | 3.1   | -39.1 | 54.7 | 30.8  | -1.7  | -9.6  |
| NIALAMIDE                                                                         | 50.3 | -19.3 | 20.8  | -24.6 | 36.6 | 16.0  | -40.1 | -13.0 |
| TRIMETAZIDINE DIHYDROCHLORIDE                                                     | 44.6 | -0.6  | 17.1  | -35.8 | 46.0 | 14.5  | -15.8 | -9.0  |
| ACETYLPHENYLALANINE                                                               | 34.1 | -33.6 | 21.7  | -25.5 | 24.7 | -11.1 | -19.5 | -12.4 |
| NIMUSTINE                                                                         | 34.5 | 6.2   | 5.0   | -42.8 | 2.1  | 15.1  | -16.3 | 19.0  |
| BETAMIPRON                                                                        | 60.8 | 9.1   | -8.4  | -41.3 | 53.9 | 24.9  | 13.5  | -14.2 |
| PRASTERONE                                                                        | 65.5 | 50.8  | 14.1  | -38.9 | 42.8 | 44.0  | 0.8   | -6.2  |
| 3-ISOBUTYL-1-METHYLBENZYLXANTHINE (IBMX)                                          | 49.3 | -1.9  | 8.5   | -45.3 | 47.5 | 17.1  | 4.0   | -13.5 |
| SINOMENINE                                                                        | 49.6 | 14.4  | 17.6  | -35.7 | 44.9 | 47.4  | -2.1  | -9.0  |
| AMPYRONE                                                                          | 53.0 | -2.8  | -5.3  | -43.3 | 40.8 | 11.8  | -30.7 | -8.1  |
| DIETHYLTOLUAMIDE                                                                  | 58.4 | 14.9  | 7.8   | -47.5 | 47.2 | 39.9  | -0.8  | -11.8 |
| 5,7-DIHYDROXY-4-METHYLCOUMARIN                                                    | 39.2 | -10.5 | 18.4  | -39.9 | 30.5 | -0.5  | -0.7  | -13.5 |
| NORCANTHARIDIN                                                                    | 40.9 | -4.6  | 20.2  | -43.9 | 29.1 | 25.1  | -2.4  | -4.8  |

|                                          |      |       |      |       |       |       |        |       |
|------------------------------------------|------|-------|------|-------|-------|-------|--------|-------|
| 2,3-DIHYDROXY-6,7-DICHLOROQUINOXALINE    | 43.0 | -15.1 | 12.6 | -44.7 | 46.0  | 17.3  | -28.4  | -0.7  |
| 2,3-DICHLORO-5,8-DIHYDROXYNAPHTHOQUINONE | 49.6 | -1.7  | 6.8  | -45.5 | 45.4  | 28.0  | -46.4  | -7.1  |
| BISSALICYL FUMARATE                      | 53.8 | -0.5  | 12.2 | -42.2 | 38.8  | 11.2  | -35.5  | -13.7 |
| PALMATINE                                | 44.1 | -9.6  | 16.1 | -27.8 | 44.4  | 19.8  | 5.5    | 12.5  |
| ASCORBYL PALMITATE                       | 23.2 | -31.3 | 22.0 | -34.0 | 16.2  | -30.5 | 15.9   | 4.5   |
| METHOXYVONE                              | -0.4 | -5.3  | 8.4  | -35.0 | 0.1   | 0.2   | 1.8    | 3.5   |
| ALLOXAN                                  | 45.6 | -3.2  | -4.8 | -46.4 | 36.2  | 17.9  | -37.3  | -12.4 |
| DIPLOSALSALATE                           | 58.6 | 39.1  | 1.8  | -41.7 | 44.8  | 42.1  | -28.9  | -13.9 |
| 3H-1,2-DITHIOLE-3-THIONE                 | 40.6 | -15.1 | 16.6 | -45.7 | 32.9  | 22.4  | -24.3  | -10.1 |
| 2,2'-AZO-bis-2-AMINOPROPANE              | 49.4 | 27.1  | 13.0 | -23.3 | 41.9  | 41.9  | -31.2  | -12.6 |
| PROTONAMIDE                              | 48.6 | -9.1  | 4.4  | -40.9 | 63.7  | 42.5  | 0.3    | -12.6 |
| BICUCULLINE(-) METHIODIDE                | 57.9 | 18.3  | 7.7  | -42.3 | 37.5  | 30.0  | -30.2  | -6.1  |
| FAMPROFAZONE                             | 67.7 | 34.1  | 57.4 | 8.8   | 32.3  | -5.4  | -11.5  | -4.3  |
| FLOPROPIONE                              | 34.6 | -17.4 | 22.5 | -20.1 | 31.3  | 15.3  | -9.2   | -7.8  |
| SODIUM DEOXYCHOLATE                      | 75.4 | 35.5  | 40.0 | -41.7 | 34.0  | 18.4  | -130.2 | -16.5 |
| PHENYLBUTYRATE SODIUM                    | 52.0 | -23.1 | 6.2  | -25.0 | 44.2  | 26.0  | -43.0  | -13.8 |
| TRIMEBUTINE MALEATE                      | 46.3 | -13.6 | 16.7 | -39.1 | 34.7  | 18.1  | -49.2  | -8.6  |
| N-PHENYLANTHRANILIC ACID                 | 50.3 | -9.2  | 7.4  | -24.1 | 20.9  | 14.8  | -17.1  | -11.7 |
| CARMOFUR                                 | 99.1 | 93.6  | 89.6 | 88.6  | 64.8  | 20.4  | 20.5   | 1.4   |
| SR-2640                                  | 26.6 | 0.3   | 6.5  | 1.3   | -15.2 | 33.5  | -80.1  | -8.1  |
| OXELAIDIN CITRATE                        | 35.5 | -5.4  | -0.6 | -41.0 | 31.7  | 7.4   | -47.8  | -9.5  |
| ACEMETACIN                               | 63.6 | 52.3  | -9.8 | -30.8 | 49.8  | 46.8  | -24.9  | -8.8  |
| TOLPERISONE HYDROCHLORIDE                | 38.2 | -1.4  | 13.2 | -39.3 | 34.5  | 27.7  | -37.5  | -7.3  |

<sup>1</sup> Results are expressed as the average percentage of inhibition from two biological replicates.
